# Supplementary material for: Novel 1-(1-Arylimiazolin-2-Yl)-3-Arylalkilurea Derivatives with Modulatory Activity on Opioid MOP Receptors
Source: MDPI journal article supplement (doi:10.3390/molecules29030571), 2024-01-24

# Novel 1-(1-Arylimiazolin-2-Yl)-3-Arylalkilurea Derivatives with Modulatory Activity on Opioid MOP Receptors

Dominik Straszak <sup>1</sup>, Sylwia Woźniak <sup>1</sup>, Agata Siwek <sup>2</sup>, Monika Głuch-Lutwin <sup>2</sup>, Marcin Kołaczkowski <sup>2</sup>, Aldona Pietrzak <sup>3</sup>, Bartłomiej Drop <sup>4</sup> and Dariusz Matosiuk <sup>1,\*</sup>

<sup>1</sup> Department of Synthesis and Chemical Technology of Pharmaceutical Substances, Faculty of Pharmacy, Medical University, Chodzki 4A, 20-093 Lublin, Poland; dominik.straszak@gmail.com (D.S.); sylwia.wozniak@umlub.pl (S.W.)

<sup>2</sup> Faculty of Pharmacy, Jagiellonian University Medical College, Medyczna 9, 30-688 Kraków, Poland; agat.siwek@uj.edu.pl (A.S.); monika.gluch@uj.edu.pl (M.G.-L.); marcin.kolaczkowski@uj.edu.pl (M.K.)

<sup>3</sup> Department of Dermatology, Venereology, and Paediatric Dermatology, Faculty of Medicine, Medical University, Staszica 11, 20-080 Lublin, Poland; aldona.pietrzak@umlub.pl

<sup>4</sup> Department of Medical Informatics and Statistics, Medical University, Jaczewskiego 4, 20-090 Lublin, Poland; bartlomiej.drop@umlub.pl

\* Correspondence: dariusz.matosiuk@umlub.pl

## Supplementary Materials

### Content:

|                                   |             |
|-----------------------------------|-------------|
| 1. Chemical and spectral data     | page 1-17   |
| 2. Pictures of NMR and MS spectra | page 18-100 |

### Chemical part

#### 1-(1-Phenylimidazolin-2-yl)-3-benzylurea (3a)

Compound 3a was prepared according to the general procedure using 1-phenyl-2-iminoimidazolidine, benzylamine and triphosgene; a white solid with 51% yield was obtained. Formula: C<sub>17</sub>H<sub>18</sub>N<sub>4</sub>O (m.m. calc. 295.1553). M.p. 199–200°C. HRMS (ESI) *m/z* [M+H]<sup>+</sup>: 295.1644. <sup>1</sup>H NMR (600 MHz, DMSO-d<sub>6</sub>) δ 8.64 (s, 1H, NH), 7.76 (t, *J* = 2.5 Hz, 1H, NH), 7.35–7.23 (m, 8H, Ar-H), 7.03 (tt, *J* = 7.7, 1.3, 2H, Ar-H), 4.21 (d, *J* = 6.2 Hz, 2H, CH<sub>2</sub>), 3.85 (dd, *J* = 9.5, 7.5 Hz, 2H, CH<sub>2</sub>), 3.55 (dd, *J* = 9.3, 6.9 Hz, 2H, CH<sub>2</sub>). <sup>13</sup>C NMR (151 MHz, DMSO-d<sub>6</sub>) δ 159.5, 154.1, 141.7, 139.2, 129.6 (d), 128.4 (d), 127.7, 127.3 (d), 125.0, 121.1 (d), 50.5, 48.0, 42.8.

#### 1-[1-(2-Methylphenyl)imidazolin-2-yl]-3-benzylurea (3b)

Compound 3b was prepared according to the general procedure using 1-(2-methylphenyl)-2-iminoimidazolidine, benzylamine and triphosgene; a white solid with 31% yield was obtained. Formula: C<sub>18</sub>H<sub>20</sub>N<sub>4</sub>O (m.m. calc. 309.1710). M.p. 119–120°C. HRMS (ESI) *m/z* [M+H]<sup>+</sup>: 309.1364. <sup>1</sup>H NMR (600 MHz, DMSO-d<sub>6</sub>) δ 8.42 (s, 1H, NH), 7.26–7.20 (m, 7H, Ar-H), 7.19–

7.17 (m, 2H, Ar-H), 6.87 (t,  $J = 7.0$  Hz, 1H, NH), 4.20 (d,  $J = 6.5$  Hz, 2H, CH<sub>2</sub>), 3.65 (dd,  $J = 9.0, 7.4$  Hz, 2H, CH<sub>2</sub>), 3.61 (dd,  $J = 8.9, 7.2$  Hz, 2H, CH<sub>2</sub>), 2.23 (s, 3H, CH<sub>3</sub>). <sup>13</sup>C NMR (151 MHz, DMSO-d<sub>6</sub>)  $\delta$  155.2, 154.2, 140.0, 139.2, 133.6, 131.0, 128.9, 128.5 (d), 128.1, 127.6, 127.2 (d), 124.4, 50.5, 48.8, 42.9, 17.8.

#### **1-[1-(3-Methylphenyl)imidazolin-2-yl]-3-benzylurea (3c)**

Compound 3c was prepared according to the general procedure using 1-(3-methylphenyl)-2-iminoimidazolidine, benzylamine and triphosgene; a white solid with 41% yield was obtained. Formula: C<sub>18</sub>H<sub>20</sub>N<sub>4</sub>O (m.m. calc. 309.1710). M.p. 125–127°C. HRMS (ESI)  $m/z$  [M+H]<sup>+</sup>: 309.1370. <sup>1</sup>H NMR (600 MHz, DMSO-d<sub>6</sub>)  $\delta$  8.63 (s, 1H, NH), 7.53 (t,  $J = 2.0$  Hz, 1H, NH), 7.32–7.25 (m, 6H, Ar-H), 7.24–7.18 (m, 2H, Ar-H), 7.18 (ddd,  $J = 8.1, 2.5, 1.0$  Hz, 1H, Ar-H), 4.22 (d,  $J = 6.4$  Hz, 2H, CH<sub>2</sub>), 3.83 (dd,  $J = 9.6, 7.0$  Hz, 2H, CH<sub>2</sub>), 3.54 (dd,  $J = 9.4, 7.1$  Hz, 2H, CH<sub>2</sub>), 2.31 (s, 3H, CH<sub>3</sub>). <sup>13</sup>C NMR (151 MHz, DMSO-d<sub>6</sub>)  $\delta$  159.2, 154.2, 139.8, 139.8, 139.3, 129.6, 128.4 (d), 127.6, 127.2 (d), 123.2, 120.8, 119.9, 50.5, 48.0, 42.8, 21.8.

#### **1-[1-(4-Methylphenyl)imidazolin-2-yl]-3-benzylurea (3d)**

Compound 3d was prepared according to the general procedure using 1-(4-methylphenyl)-2-iminoimidazolidine, benzylamine and triphosgene; a white solid with 48% yield was obtained. Formula: C<sub>18</sub>H<sub>20</sub>N<sub>4</sub>O (m.m. calc. 309.1710). M.p. 146–148°C. HRMS (ESI)  $m/z$  [M+H]<sup>+</sup>: 309.1545. <sup>1</sup>H NMR (600 MHz, DMSO-d<sub>6</sub>)  $\delta$  8.60 (s, 1H, NH), 7.39–7.32 (m, 5H, Ar-H), 7.28–7.27 (m, 2H, Ar-H), 7.27–7.11 (m, 2H, Ar-H), 6.46 (t,  $J = 7.9$  Hz, 1H, NH), 4.22 (d,  $J = 6.6$  Hz, 2H, CH<sub>2</sub>), 3.84 (dd,  $J = 9.5, 7.0$  Hz, 2H, CH<sub>2</sub>), 3.57 (dd,  $J = 9.4, 7.0$  Hz, 2H, CH<sub>2</sub>), 2.25 (s, 3H, CH<sub>3</sub>). <sup>13</sup>C NMR (151 MHz, DMSO-d<sub>6</sub>)  $\delta$  159.6, 154.1, 140.0, 139.2, 135.0, 129.7 (d), 128.5 (d), 127.7, 127.2 (d), 120.7 (d), 50.5, 48.0, 42.9, 20.7.

#### **1-[1-(2-Chlorophenyl)imidazolin-2-yl]-3-benzylurea (3e)**

Compound 3e was prepared according to the general procedure using 1-(2-chlorophenyl)-2-iminoimidazolidine, benzylamine and triphosgene; a white solid with 32% yield was obtained. Formula: C<sub>17</sub>H<sub>17</sub>ClN<sub>4</sub>O (m.m. calc. 329.1164). M.p. 114–116°C. HRMS (ESI)  $m/z$  [M+H]<sup>+</sup>: 329.1158. <sup>1</sup>H NMR (600 MHz, DMSO-d<sub>6</sub>)  $\delta$  8.49 (s, 1H, NH), 7.54 (ddd,  $J = 8.1, 1.6, 0.5$  Hz, 1H, Ar-H), 7.46 (ddd,  $J = 7.7, 1.3, 1.1$  Hz, 1H, Ar-H), 7.44–7.31 (m, 7H, Ar-H), 7.26 (t,  $J = 7.8$  Hz, 1H, NH), 4.10 (d,  $J = 5.9$  Hz, 2H, CH<sub>2</sub>), 3.67 (dd,  $J = 9.4, 7.5$  Hz, 2H, CH<sub>2</sub>), 3.63 (dd,  $J = 9.3, 6.9$  Hz, 2H, CH<sub>2</sub>). <sup>13</sup>C NMR (151 MHz, DMSO-d<sub>6</sub>)  $\delta$  155.2, 154.3, 140.6, 139.3, 131.3, 130.1, 128.7 (d), 128.1 (d), 127.8, 127.3 (d), 124.7, 50.5, 48.8, 42.9.

#### **1-[1-(3-Chlorophenyl)imidazolin-2-yl]-3-benzylurea (3f)**

Compound 3f was prepared according to the general procedure using 1-(3-chlorophenyl)-2-iminoimidazolidine, benzylamine and triphosgene; a white solid with 44% yield was obtained.

Formula: C<sub>17</sub>H<sub>17</sub>ClN<sub>4</sub>O (m.m. calc. 329.1164). M.p. 171–173°C. HRMS (ESI)  $m/z$  [M+H]<sup>+</sup>: 329.1231. <sup>1</sup>H NMR (600 MHz, DMSO-d<sub>6</sub>) δ 8.72 (s, 1H, NH), 7.93 (t,  $J$  = 2.2 Hz, 1H, NH), 7.77 (td,  $J$  = 1.7, 0.5 Hz, 1H, Ar-H), 7.32–7.20 (m, 7H, Ar-H), 7.07 (dt,  $J$  = 8.2, 1.6 Hz, 1H, Ar-H), 4.22 (d,  $J$  = 6.1 Hz, 2H, CH<sub>2</sub>), 3.86 (dd,  $J$  = 9.0, 7.1 Hz, 2H, CH<sub>2</sub>), 3.56 (dd,  $J$  = 9.3, 7.3 Hz, 2H, CH<sub>2</sub>). <sup>13</sup>C NMR (151 MHz, DMSO-d<sub>6</sub>) δ 159.2, 154.0, 140.3, 139.1, 136.5, 128.4 (d), 128.1, 127.7 (d), 127.3 (d), 123.2, 120.0, 50.6, 48.1, 42.9.

### **1-[1-(4-Chlorophenyl)imidazolin-2-yl]-3-benzylurea (3g)**

Compound 3g was prepared according to the general procedure using 1-(4-chlorophenyl)-2-iminoimidazolidine, benzylamine and triphosgene; a white solid with 56% yield was obtained. Formula: C<sub>17</sub>H<sub>17</sub>ClN<sub>4</sub>O (m.m. calc. 329.1164). M.p. 174–175°C. HRMS (ESI)  $m/z$  [M+H]<sup>+</sup>: 329.1158. <sup>1</sup>H NMR (600 MHz, DMSO-d<sub>6</sub>) δ 8.66 (s, 1H, NH), 7.84 (t,  $J$  = 2.9 Hz, 1H, NH), 7.35 (ddd,  $J$  = 8.1, 1.5, 0.5 Hz, 2H, Ar-H), 7.32–7.20 (m, 7H, Ar-H), 4.21 (d,  $J$  = 6.4 Hz, 2H, CH<sub>2</sub>), 3.84 (dd,  $J$  = 9.6, 7.0, 2H, CH<sub>2</sub>), 3.55 (dd,  $J$  = 9.4, 7.1 Hz, 2H, CH<sub>2</sub>). <sup>13</sup>C NMR δ (151 MHz, DMSO-d<sub>6</sub>) δ 159.4, 154.2, 140.4, 139.3, 130.0, 129.4 (d), 128.4 (d), 127.7, 127.2 (d), 123.3 (d), 50.6, 48.0, 42.8.

### **1-(1-Phenylimidazolin-2-yl) -3- (1-phenylethyl) urea (4a)**

Compound 4a was prepared according to the general procedure using 1-phenyl-2-iminoimidazolidine, 1-phenylethylamine and triphosgene; a white solid with 58% yield was obtained. Formula: C<sub>18</sub>H<sub>20</sub>N<sub>4</sub>O (m.m. calc. 309.1710). M.p. 183–185°C. HRMS (ESI)  $m/z$  [M+H]<sup>+</sup>: 309.1667. <sup>1</sup>H NMR (600 MHz, DMSO-d<sub>6</sub>) δ 8.55 (s, 1H, NH), 7.63 (d,  $J$  = 2.0 Hz, 1H, Ar-H), 7.33–7.27 (m, 5H, Ar-H), 7.18–7.10 (m, 4H, Ar-H), 6.88 (d,  $J$  = 8.5 Hz, 1H, NH), 4.80–4.77 (m, 1H, CH), 3.79 (dd,  $J$  = 9.4, 7.1 Hz, 2H, CH<sub>2</sub>), 3.51 (dd,  $J$  = 9.3, 7.5 Hz, 2H, CH<sub>2</sub>), 1.35 (d,  $J$  = 6.9 Hz, 3H, CH<sub>3</sub>). <sup>13</sup>C NMR (151 MHz, DMSO-d<sub>6</sub>) δ 159.7, 154.0, 143.2, 141.7, 129.6 (d), 128.3 (d), 127.4, 126.3 (d), 124.9, 121.0 (d), 50.5, 49.9, 48.1, 22.6.

### **1-[1-(2-Methylphenyl)imidazolin-2-yl]-3-(1-phenylethyl) urea (4b)**

Compound 4b was prepared according to the general procedure using 1-(2-methylphenyl)-2-iminoimidazolidine, 1-phenylethylamine and triphosgene; a white solid with 34% yield was obtained. Formula: C<sub>19</sub>H<sub>22</sub>N<sub>4</sub>O (m.m. calc. 323.1866). M.p. 140–141°C. HRMS (ESI)  $m/z$  [M+H]<sup>+</sup>: 323.1820. <sup>1</sup>H NMR (600 MHz, DMSO-d<sub>6</sub>) δ 8.59 (s, 1H, NH), 7.69–7.27 (m, 7H, Ar-H), 7.22–7.12 (m, 2H, Ar-H), 6.86 (d,  $J$  = 8.4 Hz, 1H, NH), 4.81–4.78 (m, 1H, CH), 3.82 (dd,  $J$  = 9.5, 7.3 Hz, 2H, CH<sub>2</sub>), 3.51 (dd,  $J$  = 9.3, 6.9 Hz, 2H, CH<sub>2</sub>), 2.33 (s, 3H, CH<sub>3</sub>), 1.32 (d,  $J$  =

7.0 Hz, 3H, CH<sub>3</sub>). <sup>13</sup>C NMR (151 MHz, DMSO-d<sub>6</sub>) δ 155.2, 154.0, 143.5, 140.9, 133.5, 131.0, 129.2 (d), 128.5 (d), 128.1, 127.6 (d), 126.3, 120.7 (d), 50.6, 49.9, 48.8, 22.6, 17.8.

**1-[1-(3-Methylphenyl)imidazolin-2-yl]-3-(1-phenylethyl) urea (4c)**

Compound 4c was prepared according to the general procedure using 1-(3-methylphenyl)-2-iminoimidazolidine, 1-phenylethylamine and triphosgene; a white solid with 46% yield was obtained. Formula: C<sub>19</sub>H<sub>22</sub>N<sub>4</sub>O (m.m. calc. 323.1866). M.p. 157–158°C. HRMS (ESI) *m/z* [M+H]<sup>+</sup>: 323.1850. <sup>1</sup>H NMR (600 MHz, DMSO-d<sub>6</sub>) δ 8.57 (s, 1H, NH), 7.70 (ddd, *J* = 8.2, 1.7, 1.3 Hz, 1H, Ar-H), 7.41–7.27 (m, 5H, Ar-H), 7.20–7.18 (m, 2H, Ar-H), 7.13 (ddd, *J* = 8.1, 2.5, 1.0 Hz, 1H, Ar-H), 7.01 (d, *J* = 8.7 Hz, 1H, NH), 4.80–4.77 (m, 1H, CH), 3.82 (dd, *J* = 9.2, 6.9 Hz, 2H, CH<sub>2</sub>), 3.52 (dd, *J* = 8.9, 7.3 Hz, 2H, CH<sub>2</sub>), 2.33 (s, 3H, CH<sub>3</sub>), 1.35 (d, *J* = 7.2 Hz, 3H, CH<sub>3</sub>). <sup>13</sup>C NMR (151 MHz, DMSO-d<sub>6</sub>) δ 159.2, 153.8, 143.5, 139.9, 139.7, 129.5, 128.4 (d), 127.4, 126.3 (d), 123.2, 120.9, 119.8, 50.6, 50.0, 48.0, 22.5, 21.8.

**1-[1-(4-Methylphenyl)imidazolin-2-yl]-3-(1-phenylethyl) urea (4d)**

Compound 4d was prepared according to the general procedure using 1-(4-methylphenyl)-2-iminoimidazolidine, 1-phenylethylamine and triphosgene; a white solid with 39% yield was obtained. Formula: C<sub>19</sub>H<sub>22</sub>N<sub>4</sub>O (m.m. calc. 323.1866). M.p. 154–156°C. HRMS (ESI) *m/z* [M+H]<sup>+</sup>: 323.1545. <sup>1</sup>H NMR (600 MHz, DMSO-d<sub>6</sub>) δ 8.55 (s, 1H, NH), 7.62 (d, *J* = 2.4 Hz, 1H, NH), 7.33–7.28 (m, 4H, Ar-H), 7.18–7.13 (m, 5H, Ar-H), 4.80–4.78 (m, 1H, CH), 3.79 (dd, *J* = 9.5, 7.0 Hz, 2H, CH<sub>2</sub>), 3.51 (dd, *J* = 9.6, 7.3 Hz, 2H, CH<sub>2</sub>), 2.28 (s, 3H, CH<sub>3</sub>), 1.34 (d, *J* = 7.0 Hz, 3H). <sup>13</sup>C NMR (151 MHz, DMSO-d<sub>6</sub>) δ 159.6, 153.9, 143.5, 139.9, 135.1, 129.7 (d), 128.4 (d), 127.4, 126.2 (d), 120.7 (d), 50.5, 49.9, 48.0, 22.5, 20.6.

**1-[1-(2-Chlorophenyl)imidazolin-2-yl]-3-(1-phenylethyl) urea (4e)**

Compound 4e was prepared according to the general procedure using 1-(2-chlorophenyl)-2-iminoimidazolidine, 1-phenylethylamine and triphosgene; a white solid with 46% yield was obtained. Formula: C<sub>18</sub>H<sub>19</sub>ClN<sub>4</sub>O (m.m. calc. 343.1320). M.p. 172–174°C. HRMS (ESI) *m/z* [M+H]<sup>+</sup>: 343.2094. <sup>1</sup>H NMR (600 MHz, DMSO-d<sub>6</sub>) δ 8.69 (s, 1H, NH), 7.87 (ddd, *J* = 8.1, 1.6, 0.5 Hz, 1H, Ar-H), 7.80 (d, *J* = 2.6 Hz, 1H, NH), 7.34 (ddd, *J* = 7.7, 1.3, 1.1 Hz, 1H, Ar-H), 7.32–7.07 (m, 7H, Ar-H), 4.82–4.80 (m, 1H, CH), 3.84 (dd, *J* = 9.4, 7.5 Hz, 2H, CH<sub>2</sub>), 3.52 (dd, *J* = 9.0, 7.3 Hz, 2H, CH<sub>2</sub>), 1.34 (d, *J* = 7.2 Hz, 3H, CH<sub>3</sub>). <sup>13</sup>C NMR δ (151 MHz, DMSO-d<sub>6</sub>) δ 155.0, 153.9, 143.4, 140.6, 131.3, 130.1, 128.4 (d), 128.2, 128.1 (d), 127.4, 126.2 (d), 124.6, 50.5, 49.9, 48.8, 22.6.

**1-[1-(3-Chlorophenyl)imidazolin-2-yl]-3-(1-phenylethyl) urea (4f)**

Compound 4f was prepared according to the general procedure using 1-(3-chlorophenyl)-2-iminoimidazolidine, 1-phenylethylamine and triphosgene; a white solid with 42% yield was

obtained. Formula:  $C_{18}H_{19}ClN_4O$  (m.m. calc. 343.1320). M.p. 174–176°C. HRMS (ESI)  $m/z$   $[M+H]^+$ : 343.1365.  $^1H$  NMR (600 MHz, DMSO- $d_6$ )  $\delta$  8.68 (s, 1H, NH), 7.87 (d,  $J$  = 1.9 Hz, 1H, NH), 7.77 (td,  $J$  = 1.7, 0.5 Hz, 1H, Ar-H), 7.35–7.18 (m, 7H, Ar-H), 7.07 (dt,  $J$  = 8.2, 1.6 Hz, 1H, Ar-H), 4.82–4.81 (m, 1H, CH), 3.85 (dd,  $J$  = 9.2, 7.1 Hz, 2H,  $CH_2$ ), 3.52 (dd,  $J$  = 9.1, 7.0 Hz, 2H,  $CH_2$ ), 1.36 (d,  $J$  = 7.1 Hz, 3H,  $CH_3$ ).  $^{13}C$  NMR  $\delta$  (151 MHz, DMSO- $d_6$ )  $\delta$  159.2, 154.0, 143.5, 140.5, 136.5, 128.4 (d), 128.1, 127.7, 127.4, 126.2 (d), 123.2, 120.0, 50.6, 50.0, 48.1, 22.5.

#### **1-[1-(4-Chlorophenyl)imidazolin-2-yl]-3-(1-phenylethyl) urea (4g)**

Compound 4g was prepared according to the general procedure using 1-(4-chlorophenyl)-2-iminoimidazolidine, 1-phenylethylamine and triphosgene; a white solid with 51% yield was obtained. Formula:  $C_{18}H_{19}ClN_4O$  (m.m. calc. 343.1320). M.p. 162–164°C. HRMS (ESI)  $m/z$   $[M+H]^+$ : 343.1291.  $^1H$  NMR (600 MHz, DMSO- $d_6$ )  $\delta$  8.62 (s, 1H, NH), 7.85 (ddd,  $J$  = 8.1, 1.5, 0.5 Hz, 2H, Ar-H), 7.36–7.18 (m, 7H, Ar-H), 7.24 (d,  $J$  = 8.8 Hz, 1H, NH), 4.81–4.78 (m, 1H, CH), 3.82 (dd,  $J$  = 9.4, 6.9 Hz, 2H,  $CH_2$ ), 3.52 (dd,  $J$  = 9.4, 7.2 Hz, 2H,  $CH_2$ ), 1.35 (d,  $J$  = 7.0 Hz, 3H,  $CH_3$ ).  $^{13}C$  NMR  $\delta$  (151 MHz, DMSO- $d_6$ )  $\delta$  159.6, 153.8, 143.5, 140.4, 130.1, 129.4 (d), 128.5 (d), 127.4, 126.3 (d), 123.4 (d), 50.6, 49.9, 48.0, 22.5.

#### **1-(1-Phenylimidazolin-2-yl)-3-(2-phenylethyl)urea (5a)**

Compound 5a was prepared according to the general procedure using 1-phenyl-2-iminoimidazolidine, 2-phenylethylamine and triphosgene; a white solid with 49% yield was obtained. Formula  $C_{18}H_{20}N_4O$  (m.m. calc. 309.1710). M.p. 121–122°C. HRMS (ESI)  $m/z$   $[M+H]^+$ : 309.1688.  $^1H$  NMR (600 MHz, DMSO)  $\delta$  8.66 (s, 1H, NH), 7.34–7.25 (m, 6H, Ar-H), 7.21 (tt,  $J$  = 7.7, 1.3 Hz, 1H, Ar-H), 7.08–7.00 (m, 3H, Ar-H), 6.78 (t,  $J$  = 5.8 Hz, 1H, NH), 3.82 (dd,  $J$  = 9.2, 6.9 Hz, 2H,  $CH_2$ ), 3.62 (dd,  $J$  = 8.9, 7.1 Hz, 2H,  $CH_2$ ), 3.27–3.20 (m, 2H,  $CH_2$ ), 2.76–2.69 (m, 2H,  $CH_2$ ).  $^{13}C$  NMR  $\delta$  (151 MHz, DMSO- $d_6$ )  $\delta$  159.6, 155.1, 141.7, 139.2, 129.6 (d), 128.9 (2 x d), 128.8, 126.1, 124.9, 121.0 (d), 50.6, 48.0, 41.6, 34.9.

#### **1-[1-(2-Methylphenyl)imidazolin-2-yl]-3-(2-phenylethyl)urea (5b)**

Compound 5b was prepared according to the general procedure using 1-(2-methylphenyl)-2-iminoimidazolidine, 2-phenylethylamine and triphosgene; a white solid with 49% yield was obtained. Formula  $C_{19}H_{22}N_4O$  (m.m. calc. 323.1866). M.p. 148–150°C. HRMS (ESI)  $m/z$   $[M+H]^+$ : 323.2229.  $^1H$  NMR (600 MHz, DMSO)  $\delta$  8.69 (s, 1H, NH), 7.39–7.28 (m, 6H, Ar-H), 7.26–7.22 (m, 3H, Ar-H), 6.90 (t,  $J$  = 5.5 Hz, 1H, NH), 4.11 (dd,  $J$  = 8.9, 7.1 Hz, 2H,  $CH_2$ ), 4.01 (dd,  $J$  = 9.4, 6.9 Hz, 2H,  $CH_2$ ), 3.91–3.87 (m, 2H,  $CH_2$ ), 2.82–2.79 (m, 2H,  $CH_2$ ), 2.25 (s,

3H, CH<sub>3</sub>). <sup>13</sup>C NMR δ (151 MHz, DMSO-d<sub>6</sub>) δ 155.2, 155.1, 140.9, 139.2, 133.5, 131.0, 129.0, 128.9 (2 x d), 128.8, 128.1, 126.5, 124.4, 50.5, 48.8, 41.6, 34.9, 17.8.

#### **1-[1-(3-Methylphenyl)imidazolin-2-yl]-3-(2-phenylethyl)urea (5c)**

Compound 5c was prepared according to the general procedure using 1-(3-methylphenyl)-2-iminoimidazolidine, 2-phenylethylamine and triphosgene; a white solid with 45% yield was obtained. Formula C<sub>19</sub>H<sub>22</sub>N<sub>4</sub>O (m.m. calc. 323.1866). M.p. 115–117°C. HRMS (ESI) *m/z* [M+H]<sup>+</sup>: 323.1535. <sup>1</sup>H NMR (600 MHz, DMSO) δ 8.83 (s, 1H, NH), 7.92 (ddd, *J* = 5.8 Hz, 1H, Ar-H), 7.62 (ddd, *J* = 8.4, 2.2, 0.9 Hz, 1H, Ar-H), 7.34–7.28 (m, 3H, Ar-H), 7.26–7.18 (m, 4H, Ar-H), 6.88 (t, *J* = 2.1 Hz, 1H, NH), 3.89 (dd, *J* = 9.5, 7.0 Hz, 2H, CH<sub>2</sub>), 3.64 (dd, *J* = 9.3, 7.2 Hz, 2H, CH<sub>2</sub>), 3.26–3.22 (m, 2H, CH<sub>2</sub>), 2.75–2.71 (m, 2H, CH<sub>2</sub>), 2.29 (s, 3H, CH<sub>3</sub>). <sup>13</sup>C NMR δ (151 MHz, DMSO-d<sub>6</sub>) δ 159.2, 155.2, 139.9, 139.7, 139.2, 129.5, 129.0, 128.8 (2 x d), 126.6, 123.2, 120.9, 119.8, 50.6, 48.0, 41.6, 34.9, 21.8.

#### **1-[1-(4-Methylphenyl)imidazolin-2-yl]-3-(2-phenylethyl)urea (5d)**

Compound 5d was prepared according to the general procedure using 1-(4-methylphenyl)-2-iminoimidazolidine, 2-phenylethylamine and triphosgene; a white solid with 51% yield was obtained. Formula C<sub>19</sub>H<sub>22</sub>N<sub>4</sub>O (m.m. calc. 323.1866). M.p. 97–99°C. HRMS (ESI) *m/z* [M+H]<sup>+</sup> oznaczono: 323.1534. <sup>1</sup>H NMR (600 MHz, DMSO) δ 8.67 (s, 1H, NH), 7.85–7.84 (m, 3H, Ar-H), 7.30–7.28 (m, 3H, Ar-H), 7.21–7.19 (m, 3H, Ar-H), 6.68 (t, *J* = 5.9 Hz, 1H, NH), 4.45 (dd, *J* = 9.2, 7.3 Hz, 2H, CH<sub>2</sub>), 3.53 (dd, *J* = 9.4, 6.9 Hz, 2H CH<sub>2</sub>), 3.22–3.20 (m, 2H, CH<sub>2</sub>), 2.67–2.65 (m, 2H, CH<sub>2</sub>), 2.29 (s, 3H, CH<sub>3</sub>). <sup>13</sup>C NMR δ (151 MHz, DMSO-d<sub>6</sub>) δ 159.6, 155.1, 140.0, 139.2, 135.1, 129.7 (d), 128.9 (2 x d), 128.8, 126.5, 120.7 (d), 50.6, 48.0, 41.5, 34.9, 20.7.

#### **1-[1-(2-Chlorophenyl)imidazolin-2-yl]-3-(2-phenylethyl)urea (5e)**

Compound 5e was prepared according to the general procedure using 1-(2-chlorophenyl)-2-iminoimidazolidine, 2-phenylethylamine and triphosgene; a white solid with 32% yield was obtained. Formula C<sub>18</sub>H<sub>19</sub>ClN<sub>4</sub>O (m.m. calc. 343.1320). M.p. 113–115°C. HRMS (ESI) *m/z* [M+H]<sup>+</sup>: 343.1271. <sup>1</sup>H NMR (600 MHz, DMSO) δ 8.70 (s, 1H, NH), 7.58–7.53 (m, 2H, Ar-H), 7.29–7.21 (m, 5H, Ar-H), 7.21–7.20 (m, 2H, Ar-H), 7.09 (t, *J* = 6.2 Hz, 1H, NH), 3.82 (dd, *J* = 9.2, 7.2 Hz, 2H, CH<sub>2</sub>), 3.55 (dd, *J* = 8.9, 7.1 Hz, 2H, CH<sub>2</sub>), 3.29–3.20 (m, 2H, CH<sub>2</sub>), 2.68–2.65 (m, 2H, CH<sub>2</sub>). <sup>13</sup>C NMR δ (151 MHz, DMSO-d<sub>6</sub>) δ 155.1, 155.0, 140.6, 139.3, 131.3, 130.1, 128.9, 128.8 (d), 128.2, 128.1, 126.6, 124.6, 50.5, 48.8, 41.5, 34.9.

#### **1-[1-(3-Chlorophenyl)imidazolin-2-yl]-3-(2-phenylethyl)urea (5f)**

Compound 5f was prepared according to the general procedure using 1-(3-chlorophenyl)-2-iminoimidazolidine, 2-phenylethylamine and triphosgene; a white solid with 41% yield was obtained. Formula C<sub>18</sub>H<sub>19</sub>ClN<sub>4</sub>O (m.m. calc. 343.1320). M.p. 105–107°C. HRMS (ESI) *m/z*

[M+H]<sup>+</sup>: 343.1297. <sup>1</sup>H NMR (600 MHz, DMSO) δ 8.73 (s, 1H, NH), 7.91 (td, *J* = 1.7, 0.5 Hz, 2H, Ar-H), 7.72 (dt, *J* = 8.4, 2.2, 0.9 Hz, 1H, Ar-H), 7.35–7.17 (m, 5H, Ar-H), 7.11–7.08 (m, 1H, Ar-H), 6.88 (t, *J* = 5.5 Hz, 1H, NH), 3.87 (dd, *J* = 9.3, 7.0 Hz, 2H, CH<sub>2</sub>), 3.56 (dd, *J* = 9.0, 7.2 Hz, 2H, CH<sub>2</sub>), 3.25–3.21 (m, 2H, CH<sub>2</sub>), 2.74–2.69 (m, 2H, CH<sub>2</sub>). <sup>13</sup>C NMR δ (151 MHz, DMSO-d<sub>6</sub>) δ 159.2, 155.1, 140.3, 139.3, 136.5, 128.9 (d), 128.1, 127.7, 126.5, 123.2, 120.0, 50.6, 48.0, 41.6, 35.0.

#### **1-[1-(4-Chlorophenyl)imidazolin-2-yl]-3-(2-phenylethyl)urea (5g)**

Compound 5g was prepared according to the general procedure using 1-(4-chlorophenyl)-2-iminoimidazolidine, 2-phenylethylamine and triphosgene; a white solid with 48% yield was obtained. Formula C<sub>18</sub>H<sub>19</sub>ClN<sub>4</sub>O (m.m. calc. 343.1320). M.p. 122–123°C. HRMS (ESI) *m/z* [M+H]<sup>+</sup>: 343.1316. <sup>1</sup>H NMR (600 MHz, DMSO) δ 8.67 (s, 1H, NH), 7.85 (ddd, *J* = 7.8, 1.5, 0.5 Hz, 2H, Ar-H), 7.37 (ddd, *J* = 8.1, 1.7, 0.5 Hz, 2H, Ar-H), 7.23–7.16 (m, 5H, Ar-H), 6.84 (t, *J* = 6.1 Hz, 1H, NH), 3.86 (dd, *J* = 9.1, 7.0 Hz, 2H, CH<sub>2</sub>), 3.57 (dd, *J* = 9.2, 7.1 Hz, 2H, CH<sub>2</sub>), 3.24–3.18 (m, 2H, CH<sub>2</sub>), 2.76–2.68 (m, 2H, CH<sub>2</sub>). <sup>13</sup>C NMR δ (151 MHz, DMSO-d<sub>6</sub>) δ 159.6, 155.1, 140.4, 139.2, 130.1, 129.4 (d), 128.9 (2 x d), 128.8, 126.6, 123.4 (d), 50.6, 48.0, 41.6, 34.9.

#### **1-[1-(4-Methylphenyl)imidazolin-2-yl]-3-(1-phenylprop-2-yl)urea (6a)**

Compound 6a was prepared according to the general procedure using 1-(4-methylphenyl)-2-iminoimidazolidine, 1-phenylpropyl-2-amine and triphosgene; a white solid with 41% yield was obtained. Formula C<sub>20</sub>H<sub>24</sub>N<sub>4</sub>O (m.m. calc. 337.2023). M.p. 152–153°C. HRMS (ESI) *m/z* [M+H]<sup>+</sup>: 337.1959. <sup>1</sup>H NMR (600 MHz, DMSO-d<sub>6</sub>) δ 8.42 (s, 1H, NH), 7.83–7.79 (m, 1H, Ar-H), 7.46–7.28 (m, 5H, Ar-H), 7.28–7.16 (m, 3H, Ar-H), 6.70 (d, *J* = 8.2 Hz, 1H, NH), 4.32 (dd, *J* = 9.0, 7.2 Hz, 2H, CH<sub>2</sub>), 4.03–3.98 (m, 1H, CH), 3.77 (dd, *J* = 9.1, 7.0 Hz, 2H, CH<sub>2</sub>), 2.75 (dd, *J* = 12.8, 5.0 Hz, 1H, CH<sub>2</sub>), 2.62 (dd, *J* = 12.8, 8.0 Hz, 1H, CH<sub>2</sub>), 2.32 (s, 3H, CH<sub>3</sub>), 1.12 (d, *J* = 6.2 Hz, 3H, CH<sub>3</sub>). <sup>13</sup>C NMR δ (151 MHz, DMSO-d<sub>6</sub>) δ 159.2, 154.4, 140.0, 138.6, 135.1, 129.7 (d), 129.1 (d), 128.8 (d), 127.2, 120.7 (d), 50.5, 48.1, 47.5, 42.0, 20.8, 20.7.

#### **1-[1-(4-Chlorophenyl)imidazolin-2-yl]-3-(1-phenylprop-2-yl)urea (6b)**

Compound 6b was prepared according to the general procedure using 1-(4-chlorophenyl)-2-iminoimidazolidine, 1-phenylpropyl-2-amine and triphosgene; a white solid with 38% yield was obtained. Formula C<sub>19</sub>H<sub>21</sub>ClN<sub>4</sub>O (m.m. calc. 357.1477). M.p. 141–142°C. HRMS (ESI) *m/z* [M+H]<sup>+</sup>: 357.1048. <sup>1</sup>H NMR (600 MHz, DMSO-d<sub>6</sub>) δ 8.56 (s, 1H, NH), 7.56–7.51 (m, 1H, Ar-H), 7.44–7.41 (m, 1H, Ar-H), 7.40–7.37 (m, 1H, Ar-H), 7.36–7.31 (m, 1H, Ar-H), 7.25–

7.20 (m, 2H, Ar-H), 7.19–7.08 (m, 3H, Ar-H), 6.92 (d,  $J = 8.0$  Hz, 1H, NH), 4.05 (dd,  $J = 8.9$ , 6.9 Hz, 2H, CH<sub>2</sub>), 3.88–3.84 (m, 1H, CH), 3.60 (dd,  $J = 9.0$ , 6.9 Hz, 2H, CH<sub>2</sub>), 2.81 (dd,  $J = 13.0$ , 5.4 Hz, 1H, CH<sub>2</sub>), 2.68 (dd,  $J = 12.5$ , 8.0 Hz, 1H, CH<sub>2</sub>), 1.11 (d,  $J = 6.5$  Hz, 3H, CH<sub>3</sub>). <sup>13</sup>C NMR  $\delta$  (151 MHz, DMSO-d<sub>6</sub>)  $\delta$  159.2, 154.4, 140.4, 138.6, 130.1, 129.4 (d), 129.2 (d), 128.8 (d), 127.2, 123.4 (d), 50.6, 48.0, 47.6, 41.9, 20.8.

**1-[1-(4-Methylphenyl)imidazolin-2-yl]-3-[1-(4-chlorophenyl)prop-2-yl]urea (6c)**

Compound 6c was prepared according to the general procedure using 1-(4-methylphenyl)-2-iminoimidazolidine, 1-(4-chlorophenyl)propyl-2-amine and triphosgene; a white solid with 46% yield was obtained. Formula C<sub>20</sub>H<sub>23</sub>ClN<sub>4</sub>O (m.m. calc. 371.1633). M.p. 121–122°C. HRMS (ESI)  $m/z$  [M+H]<sup>+</sup>: 371.1621. <sup>1</sup>H NMR (600 MHz, DMSO-d<sub>6</sub>)  $\delta$  8.37 (s, 1H, NH), 7.66–7.58 (m, 1H, Ar-H), 7.49–7.40 (m, 2H, Ar-H), 7.38–7.30 (m, 2H, Ar-H), 7.28–7.19 (m, 3H, Ar-H), 7.05 (d,  $J = 8.0$  Hz, 1H, NH), 4.29 (dd,  $J = 9.1$ , 7.4 Hz, 2H, CH<sub>2</sub>), 4.03–3.99 (m, 1H, CH), 3.70 (dd,  $J = 9.2$ , 7.1 Hz, 2H, CH<sub>2</sub>), 2.67–2.54 (m, 2H, CH<sub>2</sub>), 2.33 (s, CH<sub>3</sub>), 1.08 (d,  $J = 6.3$  Hz, 3H, CH<sub>3</sub>). <sup>13</sup>C NMR  $\delta$  (151 MHz, DMSO-d<sub>6</sub>)  $\delta$  159.3, 154.5, 140.0, 136.9, 135.0, 132.1, 130.7 (d), 129.8 (d), 128.6 (d), 120.6 (d), 50.5, 48.0, 47.5, 42.1, 21.0, 20.7.

**1-[1-(4-Chlorophenyl)imidazolin-2-yl]-3-[1-(4-chlorophenyl)prop-2-yl]urea (6d)**

Compound 6d was prepared according to the general procedure using 1-(4-chlorophenyl)-2-iminoimidazolidine, 1-(4-chlorophenyl)propyl-2-amine and triphosgene; a white solid with 46% yield was obtained. Formula C<sub>19</sub>H<sub>20</sub>Cl<sub>2</sub>N<sub>4</sub>O (m.m. calc. 391.1087). M.p. 133–134°C. HRMS (ESI)  $m/z$  [M+H]<sup>+</sup>: 391.1052. <sup>1</sup>H NMR (600 MHz, DMSO-d<sub>6</sub>)  $\delta$  8.46 (s, 1H, NH), 7.57–7.46 (m, 2H, Ar-H), 7.29–7.21 (m, 2H, Ar-H), 7.20–7.10 (m, 4H, Ar-H), 7.00 (d,  $J = 8.4$  Hz, 1H, NH), 4.18 (dd,  $J = 9.2$ , 7.3 Hz, 2H, CH<sub>2</sub>), 3.98–3.91 (m, 1H, CH), 3.64 (dd,  $J = 9.0$ , 6.9 Hz, 2H, CH<sub>2</sub>), 2.65–2.57 (m, 2H, CH<sub>2</sub>), 1.13 (d,  $J = 6.0$  Hz, 3H, CH<sub>3</sub>). <sup>13</sup>C NMR  $\delta$  (151 MHz, DMSO-d<sub>6</sub>)  $\delta$  159.2, 154.4, 140.5, 136.9, 132.1, 130.6 (d), 130.1, 129.4 (d), 128.6 (d), 123.4 (d), 50.6, 48.0, 47.4, 42.1, 20.8.

**1-[1-(4-Methylphenyl)imidazolin-2-yl]-3-[1-(4-fluorophenyl)prop-2-yl]urea (6e)**

Compound 6e was prepared according to the general procedure using 1-(4-methylphenyl)-2-iminoimidazolidine, 1-(4-fluorophenyl)propyl-2-amine and triphosgene; a white solid with 54% yield was obtained. Formula C<sub>20</sub>H<sub>23</sub>FN<sub>4</sub>O (m.m. calc. 355.1929). M.p. 149–150°C. HRMS (ESI)  $m/z$  [M+H]<sup>+</sup>: 355.1891. <sup>1</sup>H NMR (600 MHz, DMSO-d<sub>6</sub>)  $\delta$  8.47 (s, 1H, NH), 7.54–7.48 (m, 2H, Ar-H), 7.29–7.19 (m, 3H, Ar-H), 7.18–7.11 (m, 3H, Ar-H), 6.98 (d,  $J = 8.6$  Hz, 1H, NH), 4.13 (dd,  $J = 9.2$ , 6.9 Hz, 2H, CH<sub>2</sub>), 3.88–3.82 (m, 1H, CH), 3.68 (dd,  $J = 9.0$ , 7.2 Hz, 2H, CH<sub>2</sub>), 2.64–2.53 (m, 2H, CH<sub>2</sub>), 2.25 (s, 3H, CH<sub>3</sub>), 1.12 (d,  $J = 5.9$  Hz, 3H, CH<sub>3</sub>). <sup>13</sup>C NMR  $\delta$

(151 MHz, DMSO- $d_6$ )  $\delta$  161.0, 159.2, 154.4, 140.0, 134.9, 130.9 (d), 129.7 (d), 120.6 (d), 115.6, 114.4, 50.5, 48.0, 47.5, 41.8, 21.0, 20.7.

**1-[1-(4-Chlorophenyl)imidazolin-2-yl]-3-[1-(4-fluorophenyl)prop-2-yl]urea (6f)**

Compound 6f was prepared according to the general procedure using 1-(4-chlorophenyl)-2-iminoimidazolidine, 1-(4-fluorophenyl)propyl-2-amine and triphosgene; a white solid with 44% yield was obtained. Formula  $C_{19}H_{20}ClFN_4O$  (m.m. calc. 375.1382). M.p. 125–126°C. HRMS (ESI)  $m/z$   $[M+H]^+$ : 375.1360.  $^1H$  NMR (600 MHz, DMSO- $d_6$ )  $\delta$  8.66 (s, 1H, NH), 7.92–7.87 (m, 2H, Ar-H), 7.43–7.32 (m, 4H, Ar-H), 7.20–7.15 (m, 2H, Ar-H), 7.01 (d,  $J$  = 7.8 Hz, 1H, NH), 4.09 (dd,  $J$  = 9.1, 7.4 Hz, 2H,  $CH_2$ ), 3.80–3.77 (m, 1H, CH), 3.59 (dd,  $J$  = 9.2, 7.3 Hz, 2H,  $CH_2$ ), 2.68–2.61 (m, 2H,  $CH_2$ ), 1.14 (d,  $J$  = 6.1 Hz, 3H,  $CH_3$ ).  $^{13}C$  NMR  $\delta$  (151 MHz, DMSO- $d_6$ )  $\delta$  163.0, 159.3, 154.5, 140.3, 134.9, 130.9 (d), 130.1, 129.5 (d), 123.3 (d), 115.4, 50.6, 48.1, 47.4, 41.6, 21.0.

**1-[1-(4-Methylphenyl)imidazolin-2-yl]-3-[1-(4-methylphenyl)prop-2-yl]urea (6g)**

Compound 6g was prepared according to the general procedure using 1-(4-methylphenyl)-2-iminoimidazolidine, 1-(4-methylphenyl)propyl-2-amine and triphosgene; a white solid with 39% yield was obtained. Formula  $C_{21}H_{26}N_4O$  (m.m. calc. 351.2179). M.p. 133–134°C. HRMS (ESI)  $m/z$   $[M+H]^+$ : 351.2234.  $^1H$  NMR (600 MHz, DMSO- $d_6$ )  $\delta$  8.59 (s, 1H, NH), 7.77 (d,  $J$  = 8.1 Hz, 1H, NH), 7.43–7.32 (m, 6H, Ar-H), 7.27–7.21 (m, 2H, Ar-H), 4.29 (dd,  $J$  = 9.3, 7.1 Hz, 2H,  $CH_2$ ), 4.04–4.01 (m, 1H, CH), 3.65 (dd,  $J$  = 8.9, 7.1 Hz, 2H,  $CH_2$ ), 2.64–2.52 (m, 2H,  $CH_2$ ), 2.31 (s, 3H,  $CH_3$ ), 2.22 (s, 3H,  $CH_3$ ), 1.03 (d,  $J$  = 6.2 Hz, 3H,  $CH_3$ ).  $^{13}C$  NMR  $\delta$  (151 MHz, DMSO- $d_6$ )  $\delta$  159.2, 154.3, 141.1, 136.3, 136.1, 135.1, 129.7 (d), 129.3, 129.2 (2 x d), 120.7 (d), 50.5, 48.0, 47.6, 41.9, 21.0, 20.9, 20.7.

**1-[1-(4-Chlorophenyl)imidazolin-2-yl]-3-[1-(4-methylphenyl)prop-2-yl]urea (6h)**

Compound 6h was prepared according to the general procedure using 1-(4-chlorophenyl)-2-iminoimidazolidine, 1-(4-methylphenyl)propyl-2-amine and triphosgene; a white solid with 36% yield was obtained. Formula  $C_{20}H_{23}ClN_4O$  (m.m. calc. 371.1633). M.p. 139–140°C. HRMS (ESI)  $m/z$   $[M+H]^+$ : 371.2033.  $^1H$  NMR (600 MHz, DMSO- $d_6$ )  $\delta$  8.48 (s, 1H, NH), 7.52–7.49 (m, 1H, Ar-H), 7.45–7.41 (m, 1H, Ar-H), 7.39–7.34 (m, 1H, Ar-H), 7.34–7.30 (m, 1H, Ar-H), 7.28–7.20 (m, 2H, Ar-H), 7.19–7.11 (m, 2H, Ar-H), 6.98 (d,  $J$  = 8.2 Hz, 1H, NH), 4.07 (d,  $J$  = 8.9, 7.0 Hz, 2H,  $CH_2$ ), 3.72–3.69 (m, 1H, CH), 3.59 (dd,  $J$  = 8.8, 7.0 Hz, 2H,  $CH_2$ ), 2.61–2.53 (m, 2H,  $CH_2$ ), 2.30 (s, 3H,  $CH_3$ ), 1.12 (d,  $J$  = 6.4 Hz, 3H,  $CH_3$ ).  $^{13}C$  NMR  $\delta$  (151 MHz, DMSO- $d_6$ )  $\delta$  159.3, 154.5, 140.4, 136.2, 136.2, 130.1, 129.4 (d), 129.2 (2 x d), 123.4 (d), 50.5, 48.0, 47.5, 42.0, 21.0, 20.8.

**1-[1-(4-Methylphenyl)imidazolin-2-yl]-3-[1-(4-methoxyphenyl)prop-2-yl]urea (6i)**

Compound 6i was prepared according to the general procedure using 1-(4-methylphenyl)-2-iminoimidazolidine, 1-(4-methoxyphenyl)propyl-2-amine and triphosgene; a white solid with 32% yield was obtained. Formula  $C_{21}H_{26}N_4O_2$  (m.m. calc. 367.2128). M.p. 147–148°C. HRMS (ESI)  $m/z$   $[M+H]^+$ : 367.2132.  $^1H$  NMR (600 MHz, DMSO- $d_6$ )  $\delta$  8.62 (s, 1H, NH), 7.59 (d,  $J$  = 8.1 Hz, 1H, NH), 7.53–7.47 (m, 3H, Ar-H), 7.44–7.38 (m, 3H, Ar-H), 7.32–7.27 (m, 2H, Ar-H), 4.19 (dd,  $J$  = 9.0, 7.0 Hz, 2H, CH<sub>2</sub>), 3.99–3.88 (m, 1H, CH), 3.67 (s, 3H, OCH<sub>3</sub>), 3.63 (dd,  $J$  = 9.1, 7.0 Hz, 2H, CH<sub>2</sub>), 2.87–2.75 (m, 2H, CH<sub>2</sub>), 2.30 (s, 3H, CH<sub>3</sub>) 1.07 (d,  $J$  = 6.3 Hz, 3H, CH<sub>3</sub>).  $^{13}C$  NMR  $\delta$  (151 MHz, DMSO- $d_6$ )  $\delta$  159.2, 158.5, 154.4, 140.0, 135.3, 132.4, 130.2 (d), 129.6 (d), 120.8 (d), 113.8 (d), 55.4, 50.7, 48.0, 47.8, 42.1, 21.1, 20.8.

**1-[1-(4-Methylphenyl)imidazolin-2-yl]-3-[1-(3,4-dichlorophenyl)prop-2-yl]urea (6j)**

Compound 6j was prepared according to the general procedure using 1-(4-methylphenyl)-2-iminoimidazolidine, 1-(3,4-dichlorophenyl)propyl-2-amine and triphosgene; a white solid with 44% yield was obtained. Formula  $C_{20}H_{22}Cl_2N_4O$  (m.m. calc. 405.1243). M.p. 117–118°C. HRMS (ESI)  $m/z$   $[M+H]^+$ : 405.1271.  $^1H$  NMR (600 MHz, DMSO- $d_6$ )  $\delta$  8.72 (s, 1H, NH), 7.38–7.20 (m, 4H, Ar-H), 7.19–7.08 (m, 3H, Ar-H), 6.77 (d,  $J$  = 7.8 Hz, 1H, NH), 4.19 (dd,  $J$  = 9.0, 7.0 Hz, 2H, CH<sub>2</sub>), 3.90–3.85 (m, 1H, CH), 3.53 (dd,  $J$  = 9.1, 6.9 Hz, 2H, CH<sub>2</sub>), 2.65–2.53 (m, 2H, CH<sub>2</sub>), 2.30 (m, 3H, CH<sub>3</sub>), 1.14 (d,  $J$  = 6.0 Hz, 3H, CH<sub>3</sub>).  $^{13}C$  NMR  $\delta$  (151 MHz, DMSO- $d_6$ )  $\delta$  159.3, 154.5, 140.0, 138.2, 135.0, 133.6, 131.9, 130.4 (d), 129.7, 127.7 (d), 120.6 (d), 50.6, 48.0, 47.5, 42.0, 21.0, 20.6.

**1-[1-(4-Chlorophenyl)imidazolin-2-yl]-3-[1-(3,4-dichlorophenyl)prop-2-yl]urea (6k)**

Compound 6k was prepared according to the general procedure using 1-(4-chlorophenyl)-2-iminoimidazolidine, 1-(3,4-dichlorophenyl)propyl-2-amine and triphosgene; a white solid with 45% yield was obtained. Formula  $C_{19}H_{19}Cl_3N_4O$  (m.m. calc. 425.0670). M.p. 109–110°C. HRMS (ESI)  $m/z$   $[M+H]^+$ : 425.0679.  $^1H$  NMR (600 MHz, DMSO- $d_6$ )  $\delta$  8.68 (s, 1H, NH), 7.84–7.76 (m, 4H, Ar-H), 7.76–7.68 (m, 3H, Ar-H), 7.18 (d,  $J$  = 8.8 Hz, 1H, NH), 4.25 (dd,  $J$  = 9.1, 6.9 Hz, 2H, CH<sub>2</sub>), 3.67–3.51 (m, 1H, CH), 3.51 (dd,  $J$  = 9.5, 7.3 Hz, 2H, CH<sub>2</sub>), 2.67–2.51 (m, 2H, CH<sub>2</sub>), 1.12 (d,  $J$  = 6.0 Hz, 3H, CH<sub>3</sub>).  $^{13}C$  NMR  $\delta$  (151 MHz, DMSO- $d_6$ )  $\delta$  159.1, 154.3, 140.4, 138.2, 133.6, 131.8, 130.5 (d), 130.1, 129.5 (d), 127.8, 123.4 (d), 50.6, 48.1, 47.5, 42.1, 21.1.

**1-[1-(4-Methylphenyl)imidazolin-2-yl]-3-[1-(furan-2-yl)prop-2-yl]urea (6l)**

Compound 6l was prepared according to the general procedure using 1-(4-methylphenyl)-2-iminoimidazolidine, 1-(furan-2-yl)propyl-2-amine and triphosgene; a white solid with 37% yield was obtained. Formula  $C_{18}H_{22}N_4O_2$  (m.m. calc. 327.1816). M.p. 170–171°C. HRMS (ESI)  $m/z$   $[M+H]^+$ : 327.2054.  $^1H$  NMR (600 MHz, DMSO- $d_6$ )  $\delta$  8.18 (s, 1H, NH), 7.41–7.19

(m, 5H, Ar-H), 6.70–6.65 (m, 2H, Ar-H), 6.42 (d,  $J = 8.7$  Hz, 1H, NH), 4.39 (dd,  $J = 9.0$ , 7.5 Hz, 2H, CH<sub>2</sub>), 4.23–4.19 (m, 1H, CH), 4.04 (dd,  $J = 8.8$ , 7.0 Hz, 2H, CH<sub>2</sub>), 2.71–2.61 (m, 2H, CH<sub>2</sub>), 2.30 (s, 3H, CH<sub>3</sub>), 1.14 (d,  $J = 5.8$  Hz, 3H, CH<sub>3</sub>). <sup>13</sup>C NMR  $\delta$  159.2, 154.3, 152.9, 141.9, 140.0, 135.0, 129.8 (d), 120.7 (d), 110.8, 108.4, 50.6, 48.1, 45.9, 34.2, 20.9, 20.7.

**1-[1-(4-Chlorophenyl)imidazolin-2-yl]-3-[1-(furan-2-yl)prop-2-yl]urea (6m)**

Compound 6m was prepared according to the general procedure using 1-(4-chlorophenyl)-2-iminoimidazolidine, 1-(furan-2-yl)propyl-2-amine and triphosgene; a white solid with 42% yield was obtained. Formula C<sub>17</sub>H<sub>19</sub>ClN<sub>4</sub>O<sub>2</sub> (m.m. calc. 347.1269). M.p. 162–163°C. HRMS (ESI)  $m/z$  [M+H]<sup>+</sup>: 347.1232. <sup>1</sup>H NMR (600 MHz, DMSO-d<sub>6</sub>)  $\delta$  8.20 (s, 1H, NH), 7.29–7.07 (m, 5H, Ar-H), 6.71–6.62 (m, 2H, Ar-H), 6.42 (d,  $J = 8.1$  Hz, 1H, NH), 4.29 (dd,  $J = 9.8$ , 7.3 Hz, 2H, CH<sub>2</sub>), 4.11–4.09 (m, 1H, CH), 3.93 (dd,  $J = 9.7$ , 7.5 Hz, 2H, CH<sub>2</sub>), 3.31–3.22 (m, 2H, CH<sub>2</sub>), 1.13 (d,  $J = 5.1$  Hz, 3H, CH<sub>3</sub>). <sup>13</sup>C NMR  $\delta$  159.2, 154.4, 152.8, 141.9, 140.4, 130.1, 129.4 (d), 123.4 (d), 110.8, 108.4, 50.6, 48.0, 46.0, 34.3, 20.8.

**1-[1-(4-Methylphenyl)imidazolin-2-yl]-3-[1-(thiophen-2-yl)prop-2-yl]urea (6n)**

Compound 6n was prepared according to the general procedure using 1-(4-methylphenyl)-2-iminoimidazolidine, 1-(thiophen-2-yl)propyl-2-amine and triphosgene; a white solid with 33% yield was obtained. Formula C<sub>18</sub>H<sub>22</sub>N<sub>4</sub>OS (m.m. calc. 343.1587). M.p. 144–145°C. HRMS (ESI)  $m/z$  [M+H]<sup>+</sup>: 343.1728. <sup>1</sup>H NMR (600 MHz, DMSO-d<sub>6</sub>)  $\delta$  8.22 (s, 1H, NH), 7.48–7.31 (m, 4H, Ar-H), 7.08–7.04 (m, 2H, Ar-H), 6.81–6.77 (m, 1H, Ar-H), 6.62 (d,  $J = 7.9$  Hz, 1H, NH), 4.14 (dd,  $J = 9.2$ , 7.4 Hz, 2H, CH<sub>2</sub>), 4.02–3.97 (m, 1H, CH), 3.81 (dd,  $J = 9.0$ , 7.1 Hz, 2H, CH<sub>2</sub>), 3.19–3.07 (m, 2H, CH<sub>2</sub>), 2.31 (s, 3H, CH<sub>3</sub>), 1.11 (d,  $J = 5.8$  Hz, 3H, CH<sub>3</sub>). <sup>13</sup>C NMR  $\delta$  159.3, 154.5, 140.2, 140.0, 135.1, 129.8 (d), 127.4, 126.6, 125.3, 120.7 (d), 50.9, 48.1, 46.4, 37.0, 21.0, 20.7.

**1-[1-(4-Chlorophenyl)imidazolin-2-yl]-3-[1-(thiophen-2-yl)prop-2-yl]urea (6o)**

Compound 6o was prepared according to the general procedure using 1-(4-chlorophenyl)-2-iminoimidazolidine, 1-(thiophen-2-yl)propyl-2-amine and triphosgene; a white solid with 39% yield was obtained. Formula C<sub>17</sub>H<sub>19</sub>ClN<sub>4</sub>OS (m.m. calc. 363.1041). M.p. 151–152°C. HRMS (ESI)  $m/z$  [M+H]<sup>+</sup>: 363.1733. <sup>1</sup>H NMR (600 MHz, DMSO-d<sub>6</sub>)  $\delta$  8.29 (s, 1H, NH), 7.46–7.28 (m, 4H, Ar-H), 7.10–7.06 (m, 2H, Ar-H), 6.78 (t,  $J = 7.0$  Hz, 1H, Ar-H), 6.59 (d,  $J = 8.2$  Hz, 1H, NH), 4.19 (dd,  $J = 9.0$ , 7.3 Hz, 2H, CH<sub>2</sub>), 4.03–3.99 (m, 2H, CH), 3.79 (dd,  $J = 9.1$ , 7.6 Hz, 2H, CH<sub>2</sub>), 3.18–3.10 (m, 2H, CH<sub>2</sub>), 1.21 (d,  $J = 5.3$  Hz, 3H, CH<sub>3</sub>). <sup>13</sup>C NMR  $\delta$  159.2, 154.4, 140.4, 140.3, 130.0, 129.5 (d), 127.3, 126.6, 125.2, 123.5 (d), 50.7, 48.1, 46.6, 37.1, 21.1.

**1-[1-(4-Methylphenyl)imidazolin-2-yl]-3-[1-(5-methylthiophen-2-yl)prop-2-yl]urea (6p)**

Compound 6p was prepared according to the general procedure using 1-(4-methylphenyl)-2-iminoimidazolidine, 1-(5-methylthiophen-2-yl)propyl-2-amine and triphosgene; a white solid with 29% yield was obtained. Formula C<sub>19</sub>H<sub>24</sub>N<sub>4</sub>OS (m.m. calc. 357.1744). M.p. 146–147°C. HRMS (ESI) *m/z* [M+H]<sup>+</sup>: 357.2069. <sup>1</sup>H NMR (600 MHz, DMSO-d<sub>6</sub>) δ 8.20 (s, 1H, NH), 7.21–7.12 (m, 4H, Ar-H), 6.81 (d, *J* = 7.6 Hz, 1H, NH), 6.74–6.67 (m, 2H, Ar-H), 4.11 (dd, *J* = 9.1, 6.9 Hz, 2H, CH<sub>2</sub>), 3.96–3.92 (m, 1H, CH), 3.58 (dd, *J* = 9.0, 7.5 Hz, 2H, CH<sub>2</sub>), 3.12–3.08 (m, 2H, CH<sub>2</sub>), 2.32 (s, 3H, CH<sub>3</sub>), 2.25 (s, 3H, CH<sub>3</sub>), 1.11 (d, *J* = 5.4 Hz, 3H, CH<sub>3</sub>). <sup>13</sup>C NMR δ 159.2, 154.4, 140.0, 139.4, 137.1, 135.1, 129.8 (d), 126.6, 125.6, 120.7 (d), 50.7, 48.1, 46.4, 38.3, 21.0, 20.7, 15.2.

#### **1-[1-(4-Chlorophenyl)imidazolin-2-yl]-3-[1-(5-methylthiophen-2-yl)prop-2-yl]urea (6r)**

Compound 6r was prepared according to the general procedure using 1-(4-chlorophenyl)-2-iminoimidazolidine, 1-(5-methylthiophen-2-yl)propyl-2-amine and triphosgene; a white solid with 31% yield was obtained. Formula C<sub>18</sub>H<sub>21</sub>ClN<sub>4</sub>OS (m.m. calc. 377.1197). M.p. 139–140°C. HRMS (ESI) *m/z* [M+H]<sup>+</sup>: 377.1178. <sup>1</sup>H NMR (600 MHz, DMSO-d<sub>6</sub>) δ 8.24 (s, 1H, NH), 7.38–7.17 (m, 4H, Ar-H), 6.81 (d, *J* = 7.1 Hz, 1H, NH), 6.63–6.59 (m, 2H, Ar-H), 4.19 (dd, *J* = 9.2, 7.4 Hz, 2H, CH<sub>2</sub>), 3.91–3.88 (m, 1H, CH), 3.61 (dd, *J* = 9.2, 7.5 Hz, 2H, CH<sub>2</sub>), 3.21–3.12 (m, 2H, CH<sub>2</sub>), 2.24 (s, 3H, CH<sub>3</sub>), 1.21 (d, *J* = 5.1 Hz, 3H, CH<sub>3</sub>). <sup>13</sup>C NMR δ 159.3, 154.4, 140.5, 139.4, 137.1, 130.1, 129.5 (d), 126.5, 125.6, 123.3 (d), 50.6, 48.1, 46.4, 38.4, 21.0, 15.2.

#### **1-[1-(4-Methoxyphenyl)imidazolin-2-yl]-3-(4-phenylbut-2-yl)urea (7a)**

Compound 7a was prepared according to the general procedure using 1-(4-methoxyphenyl)-2-iminoimidazolidine, 4-phenylbutyl-2-amine and triphosgene; a white solid with 34% yield was obtained. Formula C<sub>21</sub>H<sub>26</sub>N<sub>4</sub>O<sub>2</sub> (m.m. calc. 367.2128). M.p. 156–157°C. HRMS (ESI) *m/z* [M+H]<sup>+</sup>: 367.2181. <sup>1</sup>H NMR (600 MHz, DMSO-d<sub>6</sub>) δ 8.64 (s, 1H, NH), 7.87–7.84 (m, 2H, Ar-H), 7.38–7.34 (m, 2H, Ar-H), 7.29–7.27 (m, 1H, Ar-H), 7.21–7.10 (m, 4H, Ar-H), 6.63 (d, *J* = 8.1 Hz, 1H, NH), 3.87 (dd, *J* = 9.0, 7.2 Hz, 2H, CH<sub>2</sub>), 3.68–3.64 (m, 1H, CH), 3.75 (s, 3H, OCH<sub>3</sub>), 3.55 (dd, *J* = 9.4, 7.2 Hz, 2H, CH<sub>2</sub>), 2.60–2.53 (m, 2H, CH<sub>2</sub>), 1.74–1.63 (m, 1H, CH<sub>2</sub>), 1.62–1.52 (m, 1H, CH<sub>2</sub>), 1.07 (d, *J* = 6.5 Hz, 3H, CH<sub>3</sub>). <sup>13</sup>C NMR δ (151 MHz, DMSO-d<sub>6</sub>) δ 159.2, 155.8, 154.6, 141.6, 137.0, 128.6 (d), 128.5 (d), 126.5, 122.3 (d), 115.3 (d), 55.4, 50.6, 48.1, 45.6, 37.1, 32.5, 21.0.

#### **1-[1-(4-Chlorophenyl)imidazolin-2-yl]-3-(4-phenylbut-2-yl)urea (7b)**

Compound 7b was prepared according to the general procedure using 1-(4-chlorophenyl)-2-iminoimidazolidine, 4-phenylbutyl-2-amine and triphosgene; a white solid with 42% yield was obtained. Formula C<sub>20</sub>H<sub>23</sub>ClN<sub>4</sub>O (m.m. calc. 371.1633). M.p. 167–168°C. HRMS (ESI) *m/z* [M+H]<sup>+</sup>: 371.1720. <sup>1</sup>H NMR (600 MHz, DMSO-d<sub>6</sub>) δ 8.68 (s, 1H, NH), 7.62–7.51 (m, 2H, Ar-

H), 7.56–7.50 (m, 2H, Ar-H), 7.44 (d,  $J = 8.6$  Hz, 1H, NH), 7.38–7.11 (m, 5H, Ar-H), 3.86 (dd,  $J = 9.4, 7.5$  Hz, 2H, CH<sub>2</sub>), 3.71–3.62 (m, 1H, CH), 3.59 (dd,  $J = 9.0, 7.1$  Hz, 2H, CH<sub>2</sub>), 2.63–2.52 (m, 2H, CH<sub>2</sub>), 1.78–1.67 (m, 1H, CH<sub>2</sub>), 1.66–1.56 (m, 1H, CH<sub>2</sub>), 1.09 (d,  $J = 6.4$  Hz, 3H, CH<sub>3</sub>). <sup>13</sup>C NMR  $\delta$  (151 MHz, DMSO-d<sub>6</sub>)  $\delta$  159.1, 154.7, 141.5, 140.4, 130.2, 129.4 (d), 128.6 (d), 128.5 (d), 126.5, 123.4 (d), 50.4, 48.1, 45.6, 37.2, 32.7, 20.9.

#### **1-[1-(4-Methylphenyl)imidazolin-2-yl]-3-(4-phenylbut-2-yl)urea (7c)**

Compound 7c was prepared according to the general procedure using 1-(4-methylphenyl)-2-iminoimidazolidine, 4-phenylbutyl-2-amine and triphosgene; a white solid with 38% yield was obtained. Formula C<sub>21</sub>H<sub>26</sub>N<sub>4</sub>O (m.m. calc. 351.2179). M.p. 134–134°C. HRMS (ESI)  $m/z$  [M+H]<sup>+</sup>: 351.2234. <sup>1</sup>H NMR (600 MHz, DMSO-d<sub>6</sub>)  $\delta$  8.67 (s, 1H, NH), 7.66–7.62 (m, 2H, Ar-H), 7.58–7.52 (m, 1H, Ar-H), 7.49 (d,  $J = 8.5$  Hz, 1H, NH), 7.38–7.35 (m, 2H, Ar-H), 7.23–7.19 (m, 4H, Ar-H), 4.08 (dd,  $J = 9.0, 6.9$  Hz, 2H, CH<sub>2</sub>), 3.75–3.71 (m, 1H, CH), 3.56 (dd,  $J = 9.3, 7.1$  Hz, 2H, CH<sub>2</sub>), 2.69–2.60 (m, 2H, CH<sub>2</sub>), 2.31 (s, 3H, CH<sub>3</sub>), 1.63–1.55 (m, 2H, CH<sub>2</sub>), 1.08 (d,  $J = 6.8$  Hz, 3H, CH<sub>3</sub>). <sup>13</sup>C NMR  $\delta$  159.2, 154.0, 141.0, 140.0, 135.0, 129.8 (d), 128.8 (d), 128.4 (d), 126.4, 120.7 (d), 50.2, 48.2, 45.7, 37.0, 32.5, 20.8, 20.8.

#### **1-[1-(4-Methoxyphenyl)imidazolin-2-yl]-3[4-(4-methylphenyl)but-2-yl]urea (7d)**

Compound 7d was prepared according to the general procedure using 1-(4-methoxyphenyl)-2-iminoimidazolidine, 4-(4-methylphenyl)butyl-2-amine and triphosgene; a white solid with 32% yield was obtained. Formula C<sub>22</sub>H<sub>28</sub>N<sub>4</sub>O<sub>2</sub> (m.m. calc. 381.2285). M.p. 131–132°C. HRMS (ESI)  $m/z$  [M+H]<sup>+</sup>: 381.1758. <sup>1</sup>H NMR (600 MHz, DMSO-d<sub>6</sub>)  $\delta$  8.55 (s, 1H, NH), 7.68–7.51 (m, 2H, Ar-H), 7.28–7.16 (m, 6H, Ar-H), 6.53 (d,  $J = 7.9$  Hz, 1H, NH), 4.08 (dd,  $J = 9.3, 7.4$  Hz, 2H, CH<sub>2</sub>), 3.87–3.82 (m, 1H, CH), 3.77 (dd,  $J = 9.4, 7.2$  Hz, 2H, CH<sub>2</sub>), 3.57 (s, 3H, OCH<sub>3</sub>), 2.64–2.52 (m, 2H, CH<sub>2</sub>), 2.34 (s, 3H, CH<sub>3</sub>), 1.72–1.61 (m, 1H, CH<sub>2</sub>), 1.60–1.56 (m, 1H, CH<sub>2</sub>), 1.08 (d,  $J = 6.3$  Hz, 3H, CH<sub>3</sub>). <sup>13</sup>C NMR  $\delta$  159.1, 155.9, 154.5, 138.6, 137.5, 137.0, 129.0 (d), 128.8 (d), 122.4 (d), 115.6 (d), 55.4, 50.4, 48.2, 45.7, 37.0, 32.1, 21.0, 20.8.

#### **1-[1-(4-Methylphenyl)imidazolin-2-yl]-3[4-(4-methylphenyl)but-2-yl]urea (7e)**

Compound 7e was prepared according to the general procedure using 1-(4-methylphenyl)-2-iminoimidazolidine, 4-(4-methylphenyl)butyl-2-amine and triphosgene; a white solid with 30% yield was obtained. Formula C<sub>22</sub>H<sub>28</sub>N<sub>4</sub>O (m.m. calc. 365.2336). M.p. 120–121°C. HRMS (ESI)  $m/z$  [M+H]<sup>+</sup>: 365.2142. <sup>1</sup>H NMR (600 MHz, DMSO-d<sub>6</sub>)  $\delta$  8.67 (s, 1H, NH), 7.71 (d,  $J = 7.5$  Hz, 2H, Ar-H), 7.63–7.44 (m, 4H, Ar-H), 7.43–7.35 (m, 2H, Ar-H), 6.51 (d,  $J = 8.1$  Hz, 1H, NH), 3.98 (dd,  $J = 9.0, 7.5$  Hz, 2H, CH<sub>2</sub>), 3.87–3.82 (m, 1H, CH), 3.67 (dd,  $J = 9.2, 7.5$  Hz, 2H, CH<sub>2</sub>), 2.63–2.58 (m, 2H, CH<sub>2</sub>), 2.36 (s, 3H, CH<sub>3</sub>), 2.29 (s, 3H, CH<sub>3</sub>), 1.67–1.58 (m, 2H, CH<sub>2</sub>),

1.08 (d,  $J = 6.0$  Hz, 3H).  $^{13}\text{C}$  NMR  $\delta$  159.2, 154.7, 139.9, 138.6, 137.4, 135.0, 129.8 (d), 129.0 (d), 128.9 (d), 120.7 (d), 50.5, 48.1, 45.6, 37.1, 32.1, 21.1, 21.0, 20.8.

**1-[1-(4-Methoxyphenyl)imidazolin-2-yl]-3[4-(4-chlorophenyl)but-2-yl]urea (7f)**

Compound 7f was prepared according to the general procedure using 1-(4-methoxyphenyl)-2-iminoimidazolidine, 4-(4-chlorophenyl)butyl-2-amine and triphosgene; a white solid with 39% yield was obtained. Formula  $\text{C}_{21}\text{H}_{25}\text{ClN}_4\text{O}_2$  (m.m. calc. 401.1739). M.p. 168–169°C. HRMS (ESI)  $m/z$   $[\text{M}+\text{H}]^+$ : 401.1365.  $^1\text{H}$  NMR (600 MHz,  $\text{DMSO}-d_6$ )  $\delta$  8.18 (s, 1H, NH), 7.68–7.49 (m, 6H, Ar-H), 7.39–7.35 (m, 2H, Ar-H), 6.67 (d,  $J = 8.6$  Hz, 1H, NH), 4.14 (dd,  $J = 8.8$ , 7.1 Hz, 2H,  $\text{CH}_2$ ), 3.90–3.86 (m, 1H, CH), 3.71 (s, 3H,  $\text{OCH}_3$ ), 3.58 (dd,  $J = 9.5$ , 7.4 Hz, 2H,  $\text{CH}_2$ ), 2.71–2.63 (m, 2H,  $\text{CH}_2$ ), 1.94–1.90 (m, 1H,  $\text{CH}_2$ ), 1.89–1.86 (m, 1H,  $\text{CH}_2$ ), 1.18 (d,  $J = 6.9$  Hz, 3H,  $\text{CH}_3$ ).  $^{13}\text{C}$  NMR  $\delta$  159.1, 155.9, 154.4, 139.6, 137.1, 132.6, 130.3 (d), 128.6 (d), 122.4 (d), 115.4 (d), 55.5, 50.4, 48.1, 45.4, 37.0, 32.6, 21.1.

**1-[1-(4-Methylphenyl)imidazolin-2-yl]-3[4-(4-chlorophenyl)but-2-yl]urea (7g)**

Compound 7g was prepared according to the general procedure using 1-(4-methylphenyl)-2-iminoimidazolidine, 4-(4-chlorophenyl)butyl-2-amine and triphosgene; a white solid with 45% yield was obtained. Formula  $\text{C}_{21}\text{H}_{25}\text{ClN}_4\text{O}$  (m.m. calc. 385.1790). M.p. 176–177°C. HRMS (ESI)  $m/z$   $[\text{M}+\text{H}]^+$ : 385.1604.  $^1\text{H}$  NMR (600 MHz,  $\text{DMSO}-d_6$ )  $\delta$  ppm 8.68 (s, 1H, NH), 7.81–7.53 (m, 8H, Ar-H), 6.82 (d,  $J = 7.8$  Hz, 1H, NH), 4.22 (dd,  $J = 8.8$ , 6.9 Hz, 2H,  $\text{CH}_2$ ), 3.84–3.78 (m, 1H, CH), 3.59 (dd,  $J = 9.0$ , 7.0 Hz, 2H,  $\text{CH}_2$ ), 2.76–2.70 (m, 2H,  $\text{CH}_2$ ), 2.32 (s, 3H,  $\text{CH}_3$ ), 1.94–1.87 (m, 2H,  $\text{CH}_2$ ), 1.22 (d,  $J = 5.9$  Hz, 3H,  $\text{CH}_3$ ).  $^{13}\text{C}$  NMR  $\delta$  159.3, 154.6, 139.9, 139.5, 135.0, 132.6, 130.3 (d), 129.7 (d), 128.6 (d), 120.7 (d), 50.5, 48.0, 45.6, 37.2, 32.5, 21.0, 20.6.

**1-[1-(4-Methoxyphenyl)imidazolin-2-yl]-3[4-(4-fluorophenyl)but-2-yl]urea (7h)**

Compound 7h was prepared according to the general procedure using 1-(4-methoxyphenyl)-2-iminoimidazolidine, 4-(4-fluorophenyl)butyl-2-amine and triphosgene; a white solid with 42% yield was obtained. Formula  $\text{C}_{21}\text{H}_{25}\text{FN}_4\text{O}_2$  (m.m. calc. 385.2034). M.p. 183–184°C. HRMS (ESI)  $m/z$   $[\text{M}+\text{H}]^+$ : 385.2501.  $^1\text{H}$  NMR (600 MHz,  $\text{DMSO}-d_6$ )  $\delta$  8.93 (s, 1H, NH), 7.77–7.55 (m, 2H, Ar-H), 7.48–7.32 (m, 4H, Ar-H), 7.30–6.28 (m, 2H, Ar-H), 6.75 (d,  $J = 7.7$  Hz, 1H, NH), 3.98 (dd,  $J = 9.1$ , 7.4 Hz, 2H,  $\text{CH}_2$ ), 3.83–3.80 (m, 1H, CH), 3.71 (s, 3H,  $\text{OCH}_3$ ), 3.43 (dd,  $J = 9.0$ , 7.5 Hz, 2H,  $\text{CH}_2$ ), 2.68–2.61 (m, 2H,  $\text{CH}_2$ ), 1.42–1.35 (m, 2H,  $\text{CH}_2$ ), 1.11 (d,  $J = 6.7$  Hz, 3H,  $\text{CH}_3$ ).  $^{13}\text{C}$  NMR  $\delta$  162.4, 159.1, 155.7, 154.5, 137.4, 137.4, 137.0, 130.6 (d), 130.5, 122.3 (d), 115.4 (2 x d), 115.3, 55.3, 50.5, 48.0, 45.8, 37.0, 31.7, 20.8.

**1-[1-(4-Methylphenyl)imidazolin-2-yl]-3[4-(4-fluorophenyl)but-2-yl]urea (7i)**

Compound 7i was prepared according to the general procedure using 1-(4-methylphenyl)-2-iminoimidazolidine, 4-(4-fluorophenyl)butyl-2-amine and triphosgene; a white solid with 41%

yield was obtained. Formula  $C_{21}H_{25}FN_4O$  (m.m. calc. 369.2085). M.p. 189–190°C. HRMS (ESI)  $m/z$   $[M+H]^+$ : 369.2069.  $^1H$  NMR (600 MHz, DMSO- $d_6$ )  $\delta$  8.12 (s, 1H, NH), 7.87–7.83 (m, 2H, Ar-H), 7.50–7.38 (m, 4H, Ar-H), 7.03–6.96 (m, 2H, Ar-H), 6.62 (d,  $J$  = 8.9 Hz, 1H, NH), 4.13 (dd,  $J$  = 9.6, 7.5 Hz, 2H, CH<sub>2</sub>), 3.88–3.84 (m, 1H, CH) 3.55 (dd,  $J$  = 9.4, 7.5 Hz, 2H, CH<sub>2</sub>), 2.81–2.78 (m, 2H, CH<sub>2</sub>), 2.28 (s, 3H, CH<sub>3</sub>), 1.69–1.54 (m, 2H, CH<sub>2</sub>), 1.12 (d,  $J$  = 6.7 Hz, 3H, CH<sub>3</sub>).  $^{13}C$  NMR  $\delta$  160.4, 159.2, 154.6, 140.0, 137.4, 135.1, 130.7 (d), 130.5, 129.7 (d), 120.7 (d), 115.3, 50.4, 48.2, 45.5, 37.1, 31.7, 21.0, 20.7.

#### **1-[1-(4-Methylphenyl)imidazolin-2-yl]-3[4-(4-methoxyphenyl)but-2-yl]urea (7j)**

Compound 7j was prepared according to the general procedure using 1-(4-methylphenyl)-2-iminoimidazolidine, 4-(4-methoxyphenyl)butyl-2-amine and triphosgene; a white solid with 37% yield was obtained. Formula  $C_{22}H_{28}N_4O_2$  (m.m. calc. 381.2285). M.p. 139–140°C. HRMS (ESI)  $m/z$   $[M+H]^+$ : 381.234.  $^1H$  NMR (600 MHz, DMSO- $d_6$ )  $\delta$  8.92 (s, 1H, NH), 7.68–7.40 (m, 6H, Ar-H), 7.35 (d,  $J$  = 8.3 Hz, 2H, Ar-H), 6.72 (d,  $J$  = 8.3 Hz, 1H, NH), 4.08 (dd,  $J$  = 9.4, 7.5 Hz, 2H, CH<sub>2</sub>), 3.87–3.85 (m, 1H, CH), 3.74 (s, 3H, OCH<sub>3</sub>), 3.56 (dd,  $J$  = 9.4, 7.5 Hz, 2H, CH<sub>2</sub>), 2.58–2.53 (m, 2H, CH<sub>2</sub>), 2.31 (s, 3H, CH<sub>3</sub>), 1.76–1.61 (m, 2H, CH<sub>2</sub>), 1.08 (d,  $J$  = 6.5 Hz, 3H, CH<sub>3</sub>).  $^{13}C$  NMR  $\delta$  159.3, 158.0, 154.6, 139.9, 135.0, 134.7, 129.7 (2 x d), 129.6, 120.6 (d), 114.0 (d), 55.3, 50.6, 48.0, 45.5, 37.0, 32.3, 21.0, 20.7.

#### **1-[1-(4-Methylphenyl)imidazolin-2-yl]-3[4-(furan-2-yl)but-2-yl]urea (7k)**

Compound 7k was prepared according to the general procedure using 1-(4-methylphenyl)-2-iminoimidazolidine, 4-(furan-2-yl)butyl-2-amine and triphosgene; a white solid with 37% yield was obtained. Formula  $C_{19}H_{24}N_4O_2$  (m.m. calc. 341.1972). M.p. 166–167°C. HRMS (ESI)  $m/z$   $[M+H]^+$ : 341.2591.  $^1H$  NMR (600 MHz, DMSO- $d_6$ )  $\delta$  8.61 (s, 1H, NH), 7.46–7.28 (m, 6H, Ar-H), 6.81 (t,  $J$  = 6.0 Hz, 1H, Ar-H), 6.38 (d,  $J$  = 8.2 Hz, 1H, NH), 4.35 (dd,  $J$  = 9.2, 7.0 Hz, 2H, CH<sub>2</sub>), 4.08–4.00 (m, 1H, CH), 3.81 (dd,  $J$  = 9.0, 7.7 Hz, 2H, CH<sub>2</sub>), 2.94–2.89 (m, 2H, CH<sub>2</sub>), 2.30 (s, 3H, CH<sub>3</sub>), 1.96–1.87 (m, 2H, CH<sub>2</sub>), 1.22 (d,  $J$  = 5.5 Hz, 3H, CH<sub>3</sub>).  $^{13}C$  NMR  $\delta$  159.3, 155.5, 154.5, 141.6, 139.9, 135.1, 129.7 (d), 120.7 (d), 110.0, 107.8, 50.6, 48.1, 46.2, 33.8, 25.5, 20.8, 20.6.

#### **1-[1-(4-Chlorophenyl)imidazolin-2-yl]-3[4-(furan-2-yl)but-2-yl]urea (7l)**

Compound 7l was prepared according to the general procedure using 1-(4-chlorophenyl)-2-iminoimidazolidine, 4-(furan-2-yl)butyl-2-amine and triphosgene; a white solid with 39% yield was obtained. Formula  $C_{18}H_{21}ClN_4O_2$  (m.m. calc. 361.1426). M.p. 149–150°C. HRMS (ESI)  $m/z$   $[M+H]^+$ : 361.2080.  $^1H$  NMR (600 MHz, DMSO- $d_6$ )  $\delta$  8.78 (s, 1H, NH), 7.49–7.28 (m, 6H,

Ar-H), 6.97–6.93 (m, 1H, Ar-H), 6.53 (d,  $J = 8.0$  Hz, 1H, NH), 4.38 (dd,  $J = 9.4, 6.9$  Hz, 2H, CH<sub>2</sub>), 4.14–4.11 (m, 1H, CH), 3.91 (dd,  $J = 8.9, 7.1$  Hz, 2H, CH<sub>2</sub>), 2.98–2.91 (m, 2H, CH<sub>2</sub>), 1.83–1.76 (m, 2H, CH<sub>2</sub>) 1.11 (d,  $J = 5.6$  Hz, 3H, CH<sub>3</sub>). <sup>13</sup>C NMR  $\delta$  159.3, 155.6, 154.5, 141.5, 140.4, 130.0 (d), 129.4, 123.3 (d), 110.0, 107.8, 50.5, 48.1, 46.1, 33.9, 25.6, 20.8.

**1-[1-(4-Methylphenyl)imidazolin-2-yl]-3[4-(thiophen-2-yl)but-2-yl]urea (7m)**

Compound 7m was prepared according to the general procedure using 1-(4-methylphenyl)-2-iminoimidazolidine, 4-(thiophen-2-yl)butyl-2-amine and triphosgene; a white solid with 31% yield was obtained. Formula C<sub>19</sub>H<sub>28</sub>N<sub>4</sub>OS (m.m. calc. 357.1744). M.p. 171–172°C. HRMS (ESI)  $m/z$  [M+H]<sup>+</sup>: 357.1744. <sup>1</sup>H NMR (600 MHz, DMSO-d<sub>6</sub>)  $\delta$  8.39 (s, 1H, NH), 7.96–7.92 (m, 2H, Ar-H), 7.62–7.53 (m, 4H, Ar-H), 7.21–7.17 (m, 1H, Ar-H), 6.52 (d,  $J = 7.4$  Hz, 1H, NH), 4.18 (dd,  $J = 9.2, 7.4$  Hz, 2H, CH<sub>2</sub>), 3.88–3.84 (m, 1H, CH), 3.54 (dd,  $J = 9.0, 7.8$  Hz, 2H, CH<sub>2</sub>), 2.76–2.69 (m, 2H, CH<sub>2</sub>), 1.84–1.79 (m, 2H, CH<sub>2</sub>), 1.21 (d,  $J = 4.4$  Hz, 3H, CH<sub>3</sub>). <sup>13</sup>C NMR  $\delta$  159.2, 154.5, 143.6, 140.0, 140.0, 135.0, 129.8 (d), 127.2, 125.8, 125.2, 120.7 (d), 50.5, 48.1, 46.0, 36.2, 29.5, 20.9, 20.6.

**1-[1-(4-Chlorophenyl)imidazolin-2-yl]-3[4-(thiophen-2-yl)but-2-yl]urea (7n)**

Compound 7n was prepared according to the general procedure using 1-(4-chlorophenyl)-2-iminoimidazolidine, 4-(thiophen-2-yl)butyl-2-amine and triphosgene; a white solid with 42% yield was obtained. Formula C<sub>18</sub>H<sub>21</sub>ClN<sub>4</sub>OS (m.m. calc. 377.1197). M.p. 154–155°C. HRMS (ESI)  $m/z$  [M+H]<sup>+</sup>: 377.1122. <sup>1</sup>H NMR (600 MHz, DMSO-d<sub>6</sub>)  $\delta$  8.07 (s, 1H, NH), 7.83–7.79 (m, 2H, Ar-H), 7.54–7.52 (m, 2H, Ar-H), 7.13–7.09 (m, 2H, Ar-H), 6.61 (t,  $J = 5.3$  Hz, 1H, Ar-H), 6.39 (d,  $J = 7.9$  Hz, 1H, NH), 4.18 (dd,  $J = 9.2, 7.7$  Hz, 2H, CH<sub>2</sub>), 3.88–3.85 (m, 1H, CH), 3.58 (dd,  $J = 9.2, 7.5$  Hz, 2H, CH<sub>2</sub>), 2.67–2.56 (m, 2H, CH<sub>2</sub>), 1.93–1.88 (m, 2H, CH<sub>2</sub>), 1.21 (d,  $J = 6.1$  Hz, 3H, CH<sub>3</sub>). <sup>13</sup>C NMR  $\delta$  159.1, 154.6, 143.7, 140.4, 130.0, 129.4 (d), 127.1, 125.8, 125.8, 125.3, 123.3 (d), 50.5, 48.1, 46.0, 36.2, 29.4, 21.0.

**1-[1-(4-Methylphenyl)imidazolin-2-yl]-3[4-(5-methylthiophen-2-yl)but-2-yl]urea (7o)**

Compound 7o was prepared according to the general procedure using 1-(4-methylphenyl)-2-iminoimidazolidine, 4-(5-methylthiophen-2-yl)butyl-2-amine and triphosgene; a white solid with 33% yield was obtained. Formula C<sub>20</sub>H<sub>26</sub>N<sub>4</sub>OS (m.m. calc. 371.1900). M.p. 173–174°C. HRMS (ESI)  $m/z$  [M+H]<sup>+</sup>: 371.1632. <sup>1</sup>H NMR (600 MHz, DMSO-d<sub>6</sub>)  $\delta$  8.44 (s, 1H, NH), 7.74–7.67 (m, 2H, Ar-H), 7.48–7.41 (m, 2H, Ar-H), 7.04–6.98 (m, 2H, Ar-H), 6.51 (d,  $J = 7.7$  Hz, 1H, NH), 4.48 (dd,  $J = 9.2, 7.4$  Hz, 2H, CH<sub>2</sub>), 4.16–4.13 (m, 1H, CH), 3.92 (dd,  $J = 9.2, 7.5$  Hz, 2H, CH<sub>2</sub>), 3.08–2.97 (m, 2H, CH<sub>2</sub>), 2.34 (s, 3H, CH<sub>3</sub>) 2.22 (s, 3H, CH<sub>3</sub>), 1.81–1.73 (m, 2H, CH<sub>2</sub>), 1.21 (d,  $J = 5.0$  Hz, 3H, CH<sub>3</sub>). <sup>13</sup>C NMR  $\delta$  159.3, 154.5, 143.0, 139.9, 137.5, 135.0, 129.7 (d), 126.0, 125.6, 120.7 (d), 50.5, 48.0, 46.0, 36.0, 30.6, 20.9, 20.6, 15.5.

**1-[1-(4-Chlorophenyl)imidazolin-2-yl]-3[4-(5-methylthiophen-2-yl)but-2-yl]urea (7p)**

Compound 7p was prepared according to the general procedure using 1-(4-chlorophenyl)-2-iminoimidazolidine, 4-(5-methylthiophen-2-yl)butyl-2-amine and triphosgene; a white solid with 29% yield was obtained. Formula C<sub>19</sub>H<sub>23</sub>ClN<sub>4</sub>OS (m.m. calc. 391.1354). M.p. 119–120°C. HRMS (ESI)  $m/z$  [M+H]<sup>+</sup>: 391.1201. <sup>1</sup>H NMR (600 MHz, DMSO-d<sub>6</sub>) δ 8.51 (s, 1H, NH), 7.55–7.49 (m, 4H, Ar-H), 7.12–7.06 (m, 2H, Ar-H), 6.49 (d,  $J$  = 7.6 Hz, 1H, NH), 4.11 (dd,  $J$  = 9.2, 7.1 Hz, 2H, CH<sub>2</sub>), 3.79–3.72 (m, 1H, CH), 3.61 (dd,  $J$  = 9.0, 7.3 Hz, 2H, CH<sub>2</sub>), 2.92–2.84 (m, 2H, CH<sub>2</sub>), 2.29 (s, 3H, CH<sub>3</sub>), 1.93–1.85 (m, 2H, CH<sub>2</sub>), 1.24 (d,  $J$  = 5.8 Hz, 3H, CH<sub>3</sub>). <sup>13</sup>C NMR δ 159.2, 154.8, 142.9, 140.4, 137.4, 130.0, 129.5 (d), 125.9, 125.6, 123.3 (d), 50.5, 48.0, 45.8, 36.0, 30.5, 20.9, 15.4.

## Compound 3a

### $^{13}\text{C}$ NMR spectrum

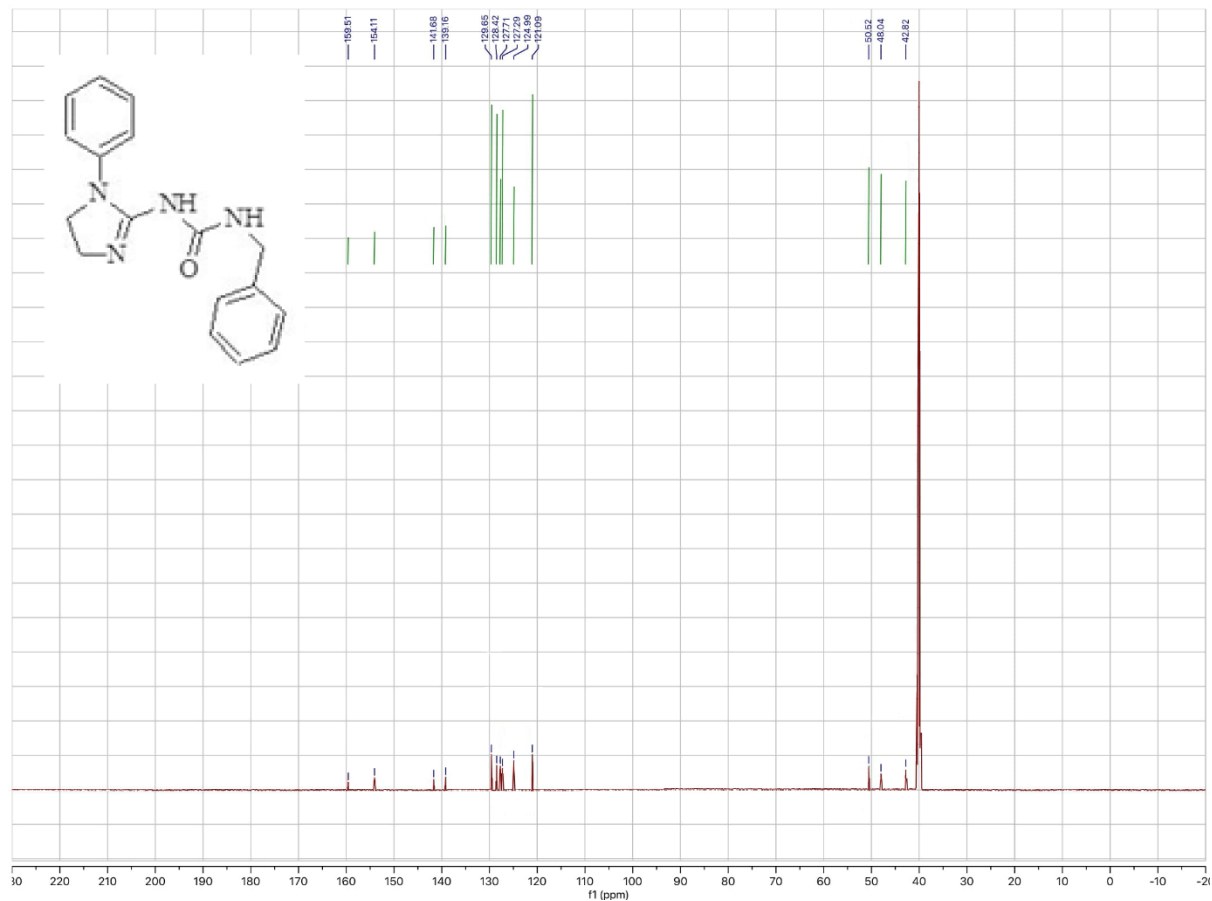

MS spectrum:  $\text{C}_{17}\text{H}_{18}\text{N}_4\text{O}$  (m.m. calc. 295.1553). HRMS (ESI)  $m/z$   $[\text{M}+\text{H}]^+$ : 295.1644.

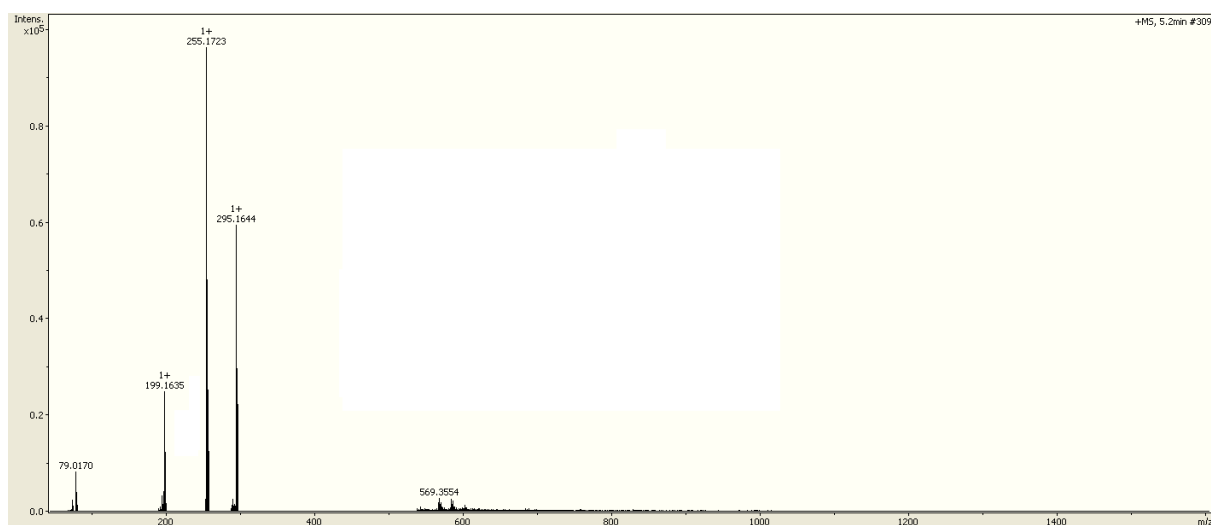

# <sup>1</sup>H NMR spectrum

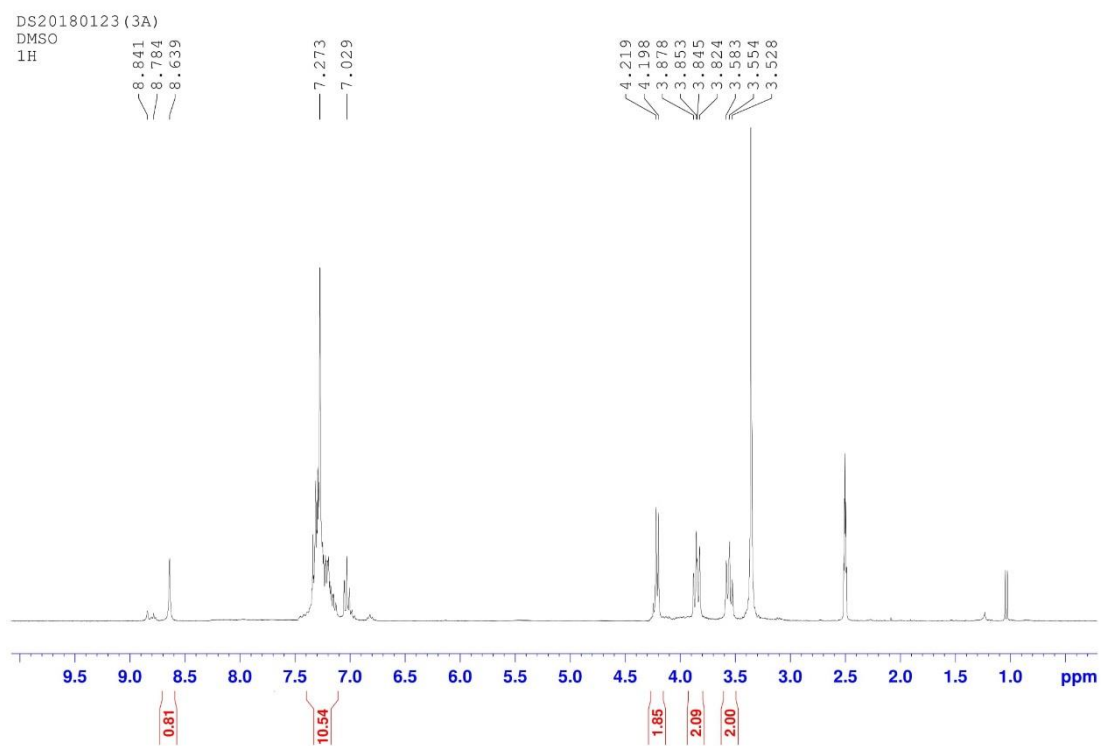

## Compound 3b

### <sup>13</sup>C NMR spectrum

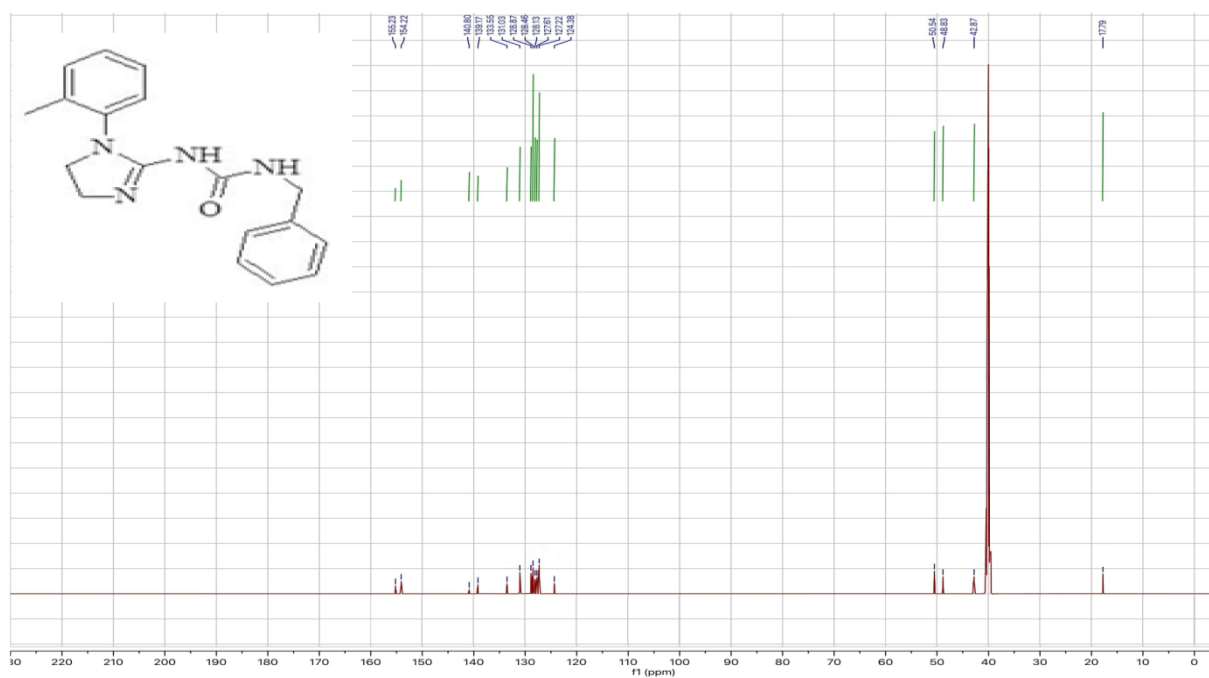

MS spectrum: C<sub>18</sub>H<sub>20</sub>N<sub>4</sub>O (m.m. calc. 309.1710). HRMS (ESI) *m/z* [M+H]<sup>+</sup>: 309.1364

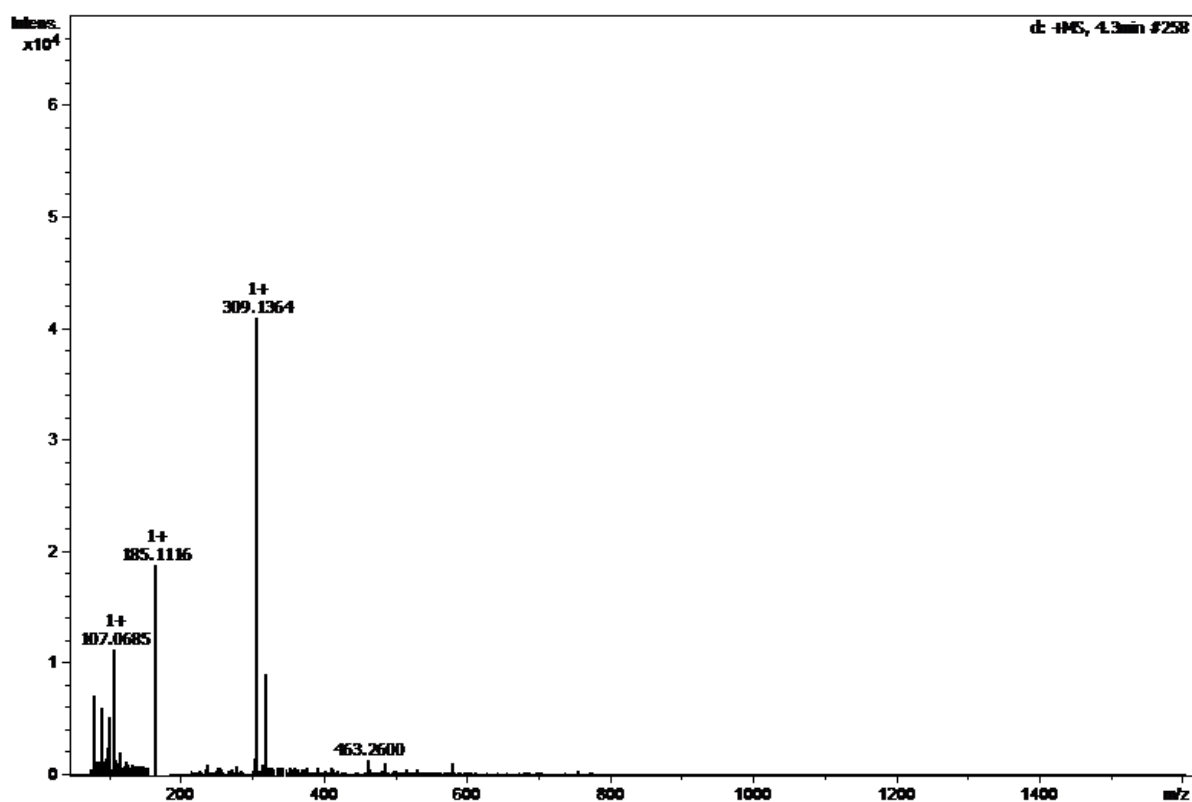

<sup>1</sup>H NMR spectrum

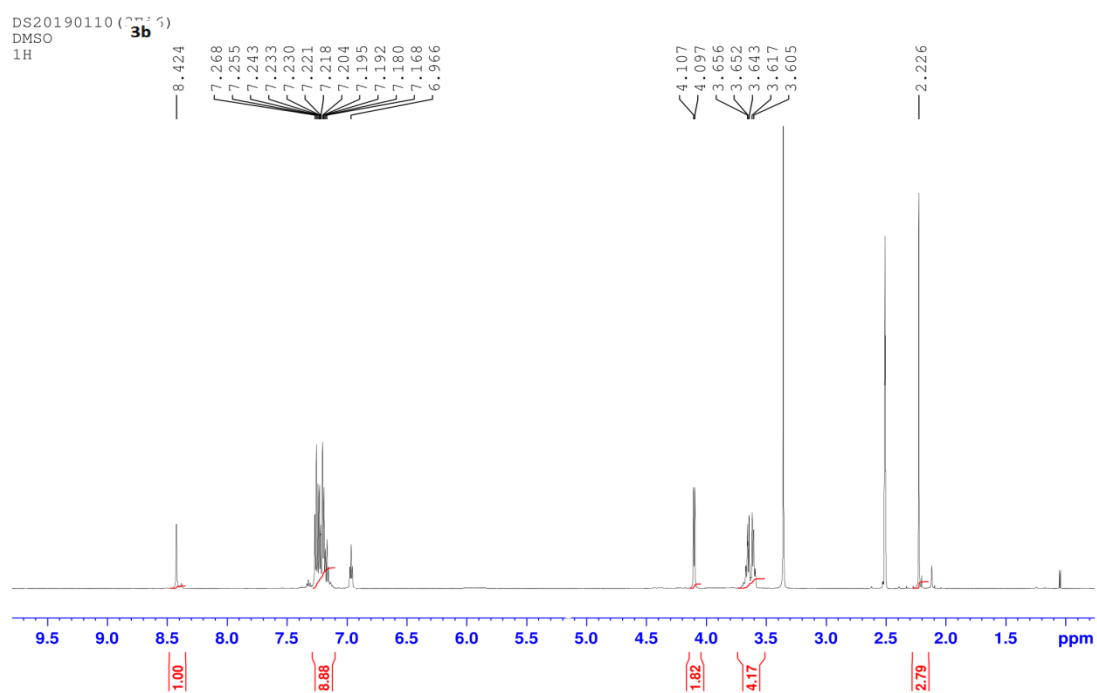

## Compound 3c

### <sup>13</sup>C NMR spectrum

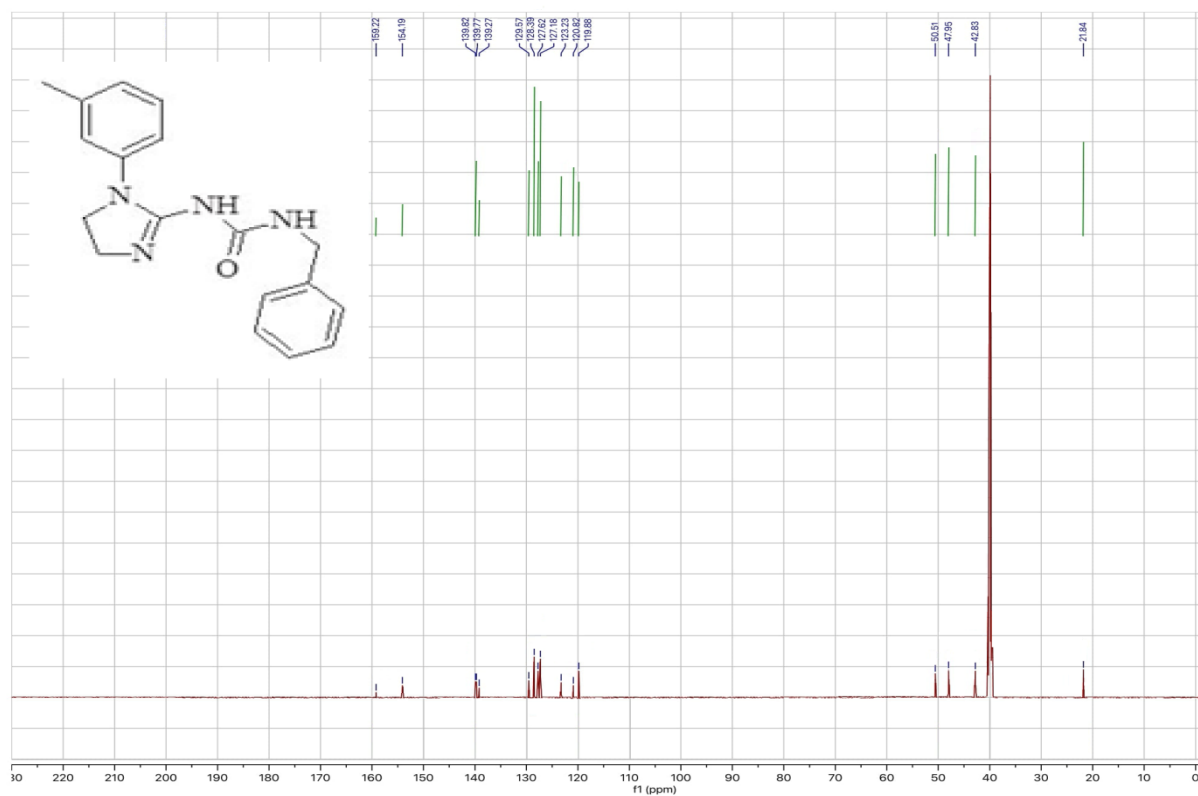

**MS spectrum:** C<sub>18</sub>H<sub>20</sub>N<sub>4</sub>O (m.m. calc. 309.1710). HRMS (ESI) *m/z* [M+H]<sup>+</sup>: 309.1370

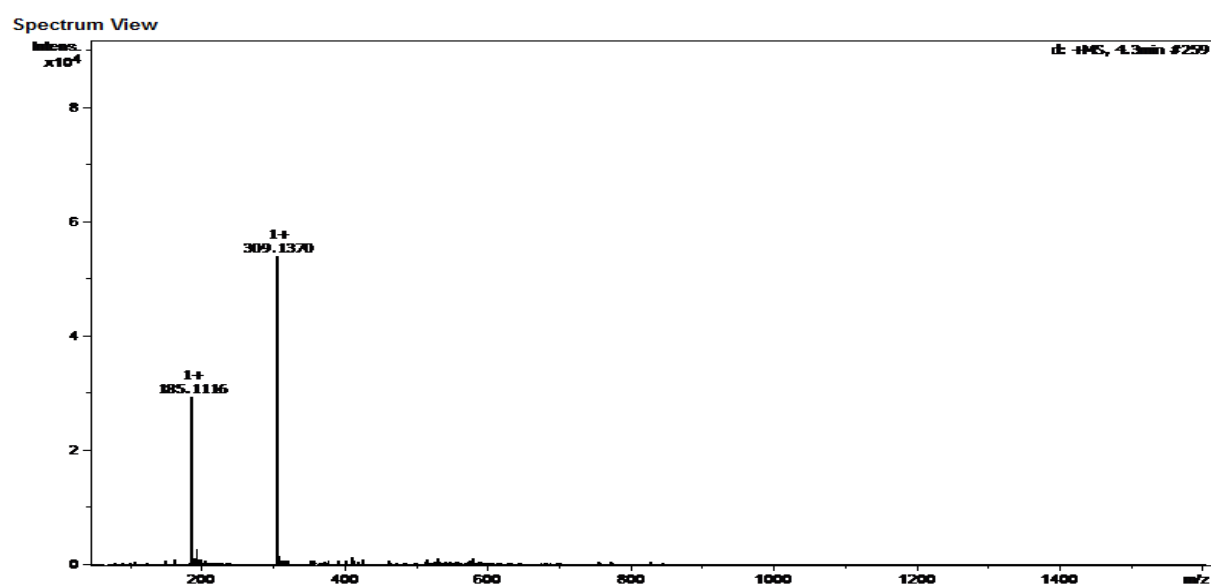

**<sup>1</sup>H NMR spectrum**

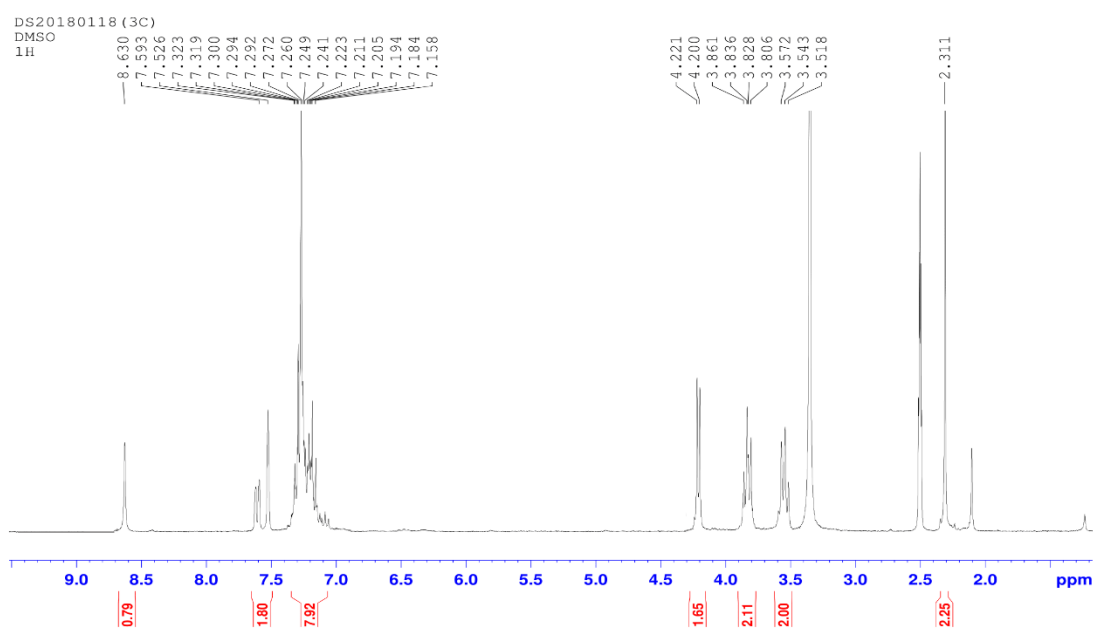

**Compound 3d**

### $^{13}\text{C}$ NMR spectrum

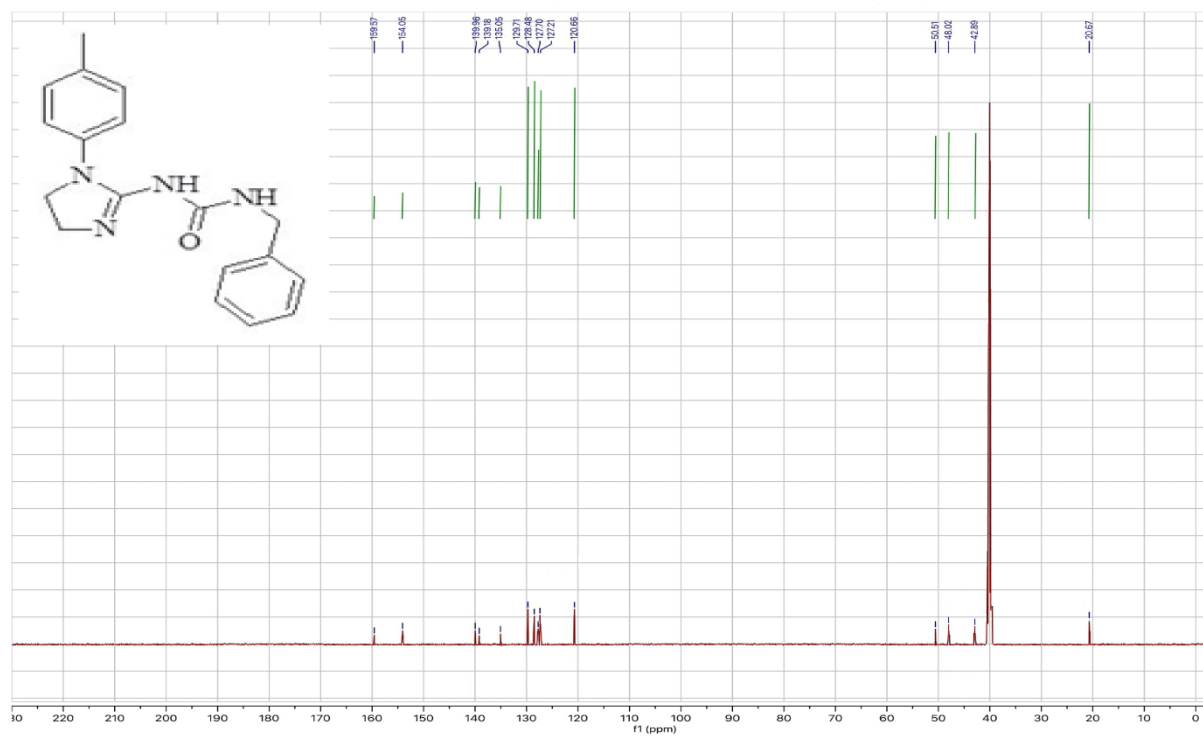

MS spectrum:  $\text{C}_{18}\text{H}_{20}\text{N}_4\text{O}$  (m.m. calc. 309.1710). HRMS (ESI)  $m/z$   $[\text{M}+\text{H}]^+$ : 309.1545.

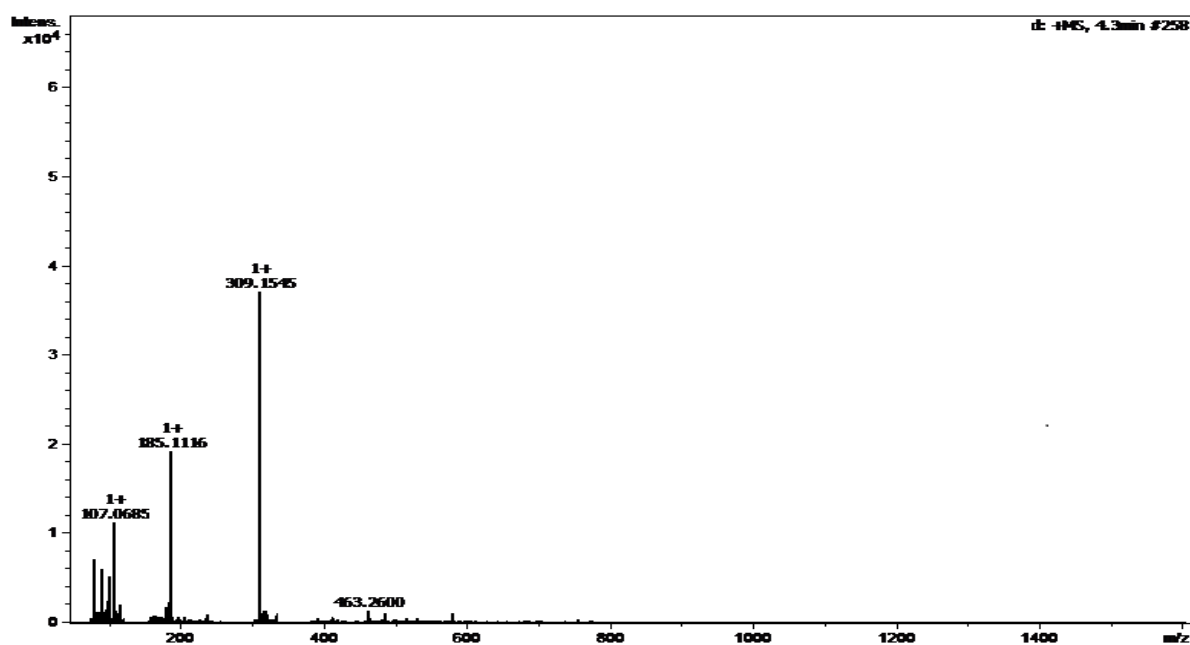

### $^1\text{H}$ NMR spectrum

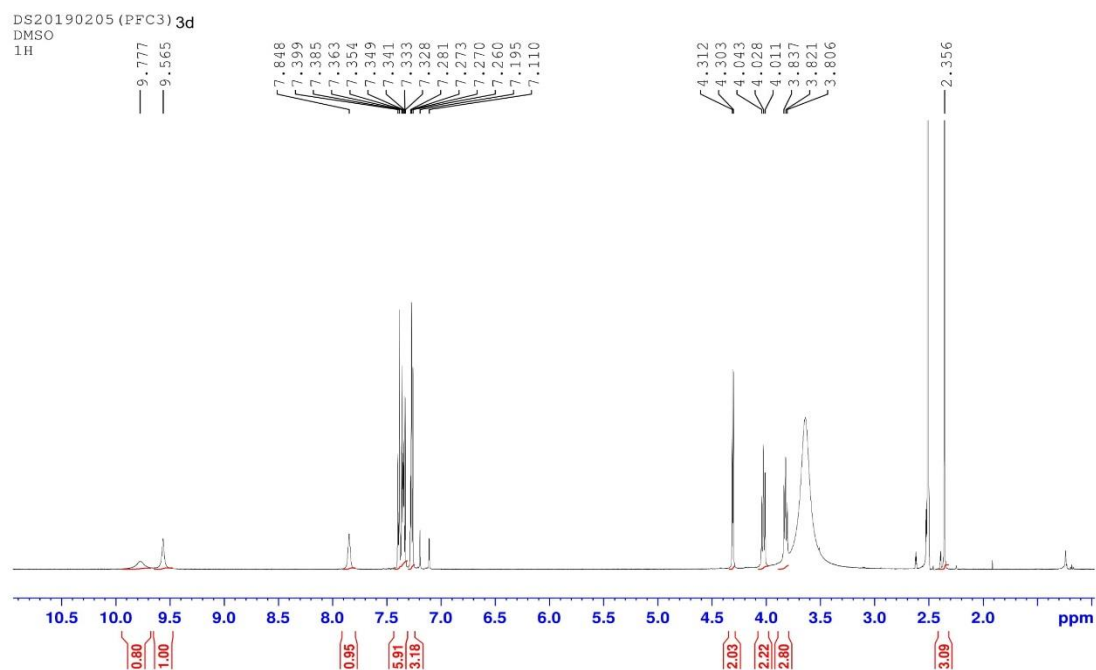

### Compound 3e

#### <sup>13</sup>C NMR spectrum

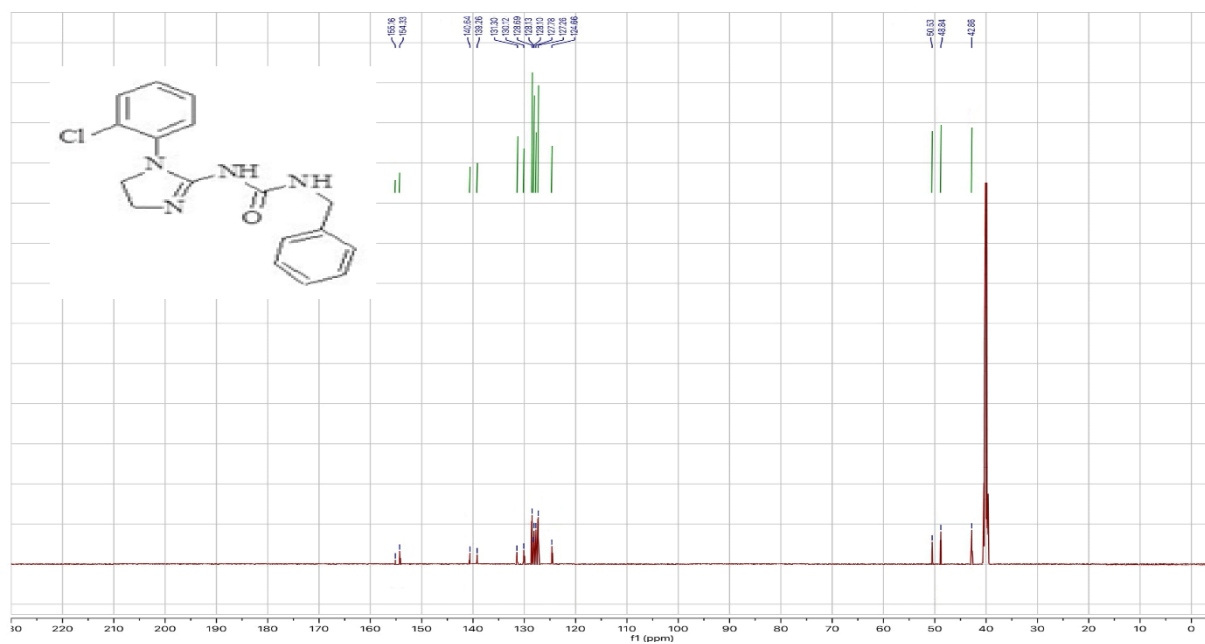

MS spectrum: C<sub>17</sub>H<sub>17</sub>ClN<sub>4</sub>O (m.m. calc. 329.1164). HRMS (ESI)  $m/z$  [M+H]<sup>+</sup>: 329.1158.

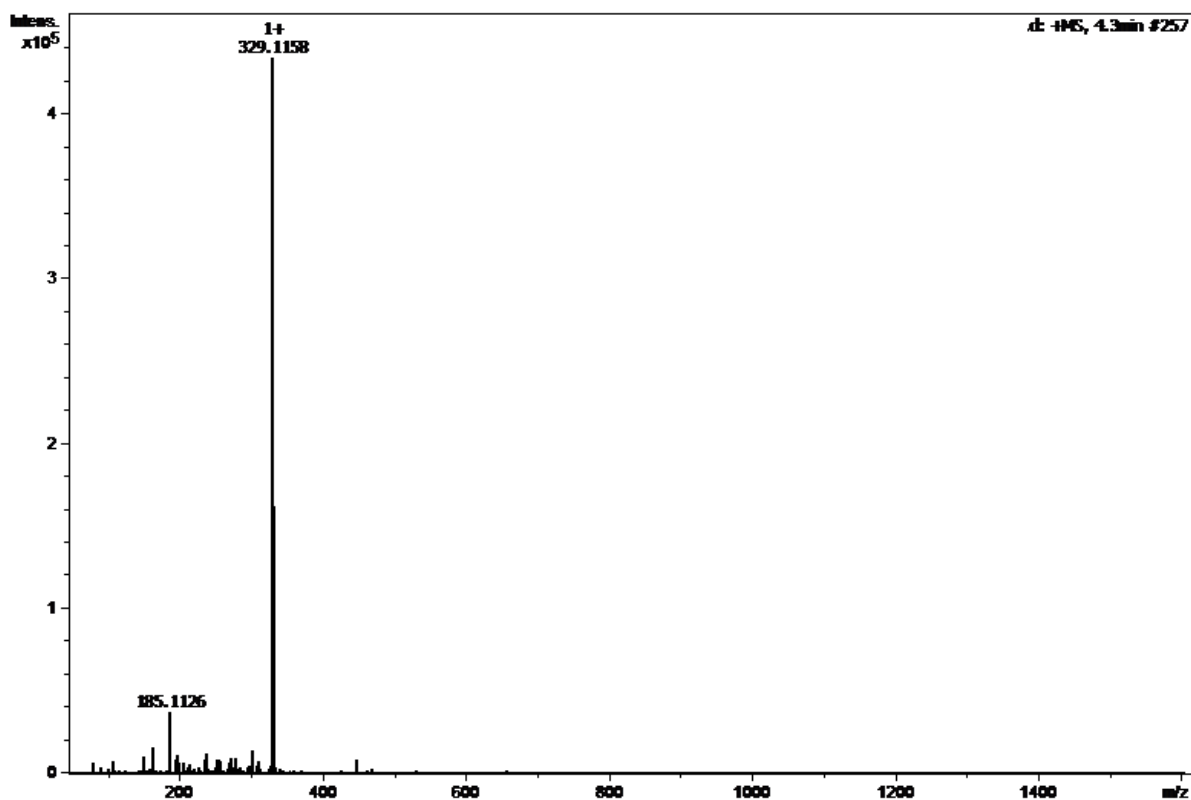

<sup>1</sup>H NMR spectrum

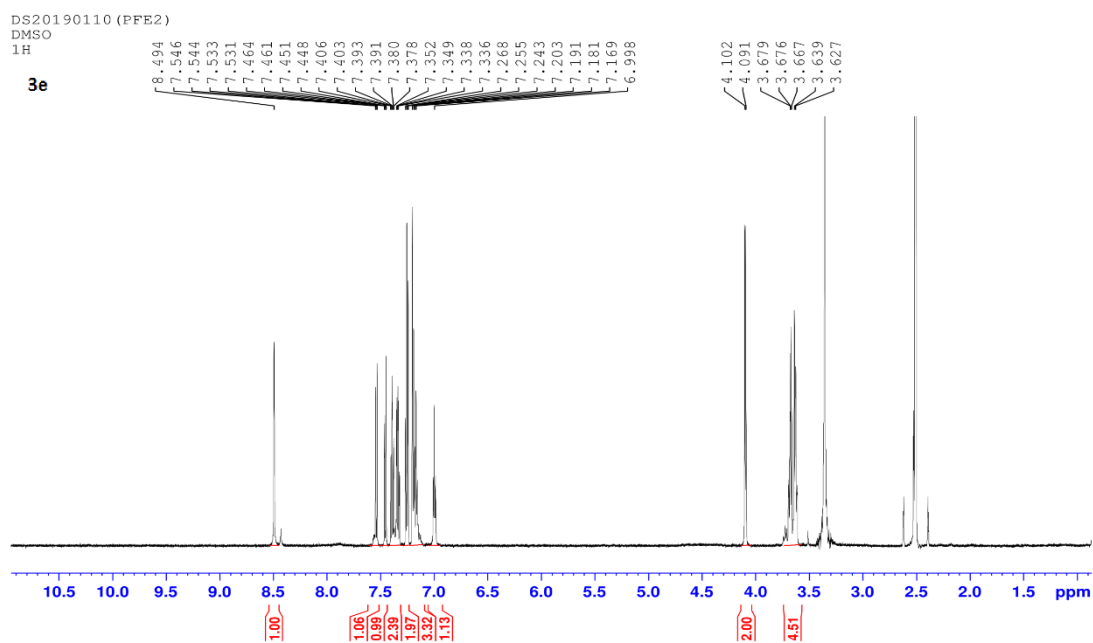

Compound 3f

<sup>13</sup>C NMR spectrum

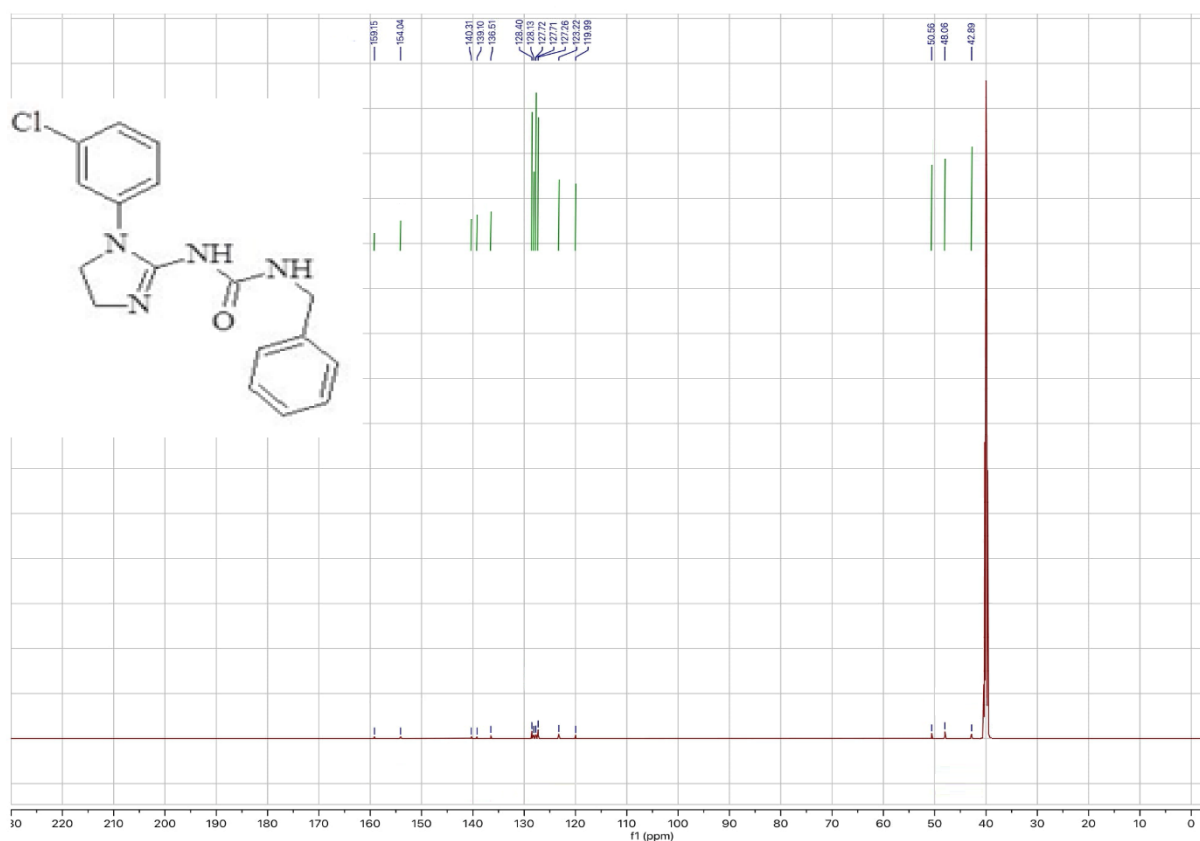

MS spectrum: C<sub>17</sub>H<sub>17</sub>ClN<sub>4</sub>O (m.m. calc. 329.1164). HRMS (ESI) *m/z* [M+H]<sup>+</sup>: 329.1231.

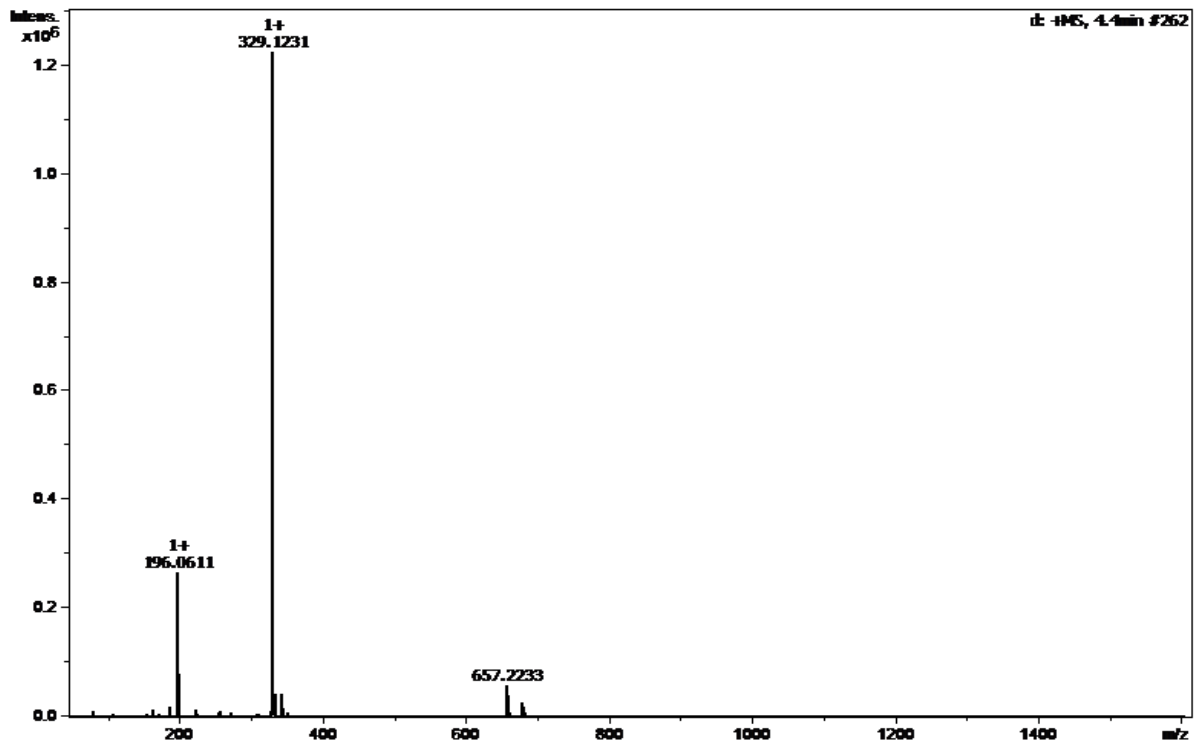

<sup>1</sup>H NMR spectrum

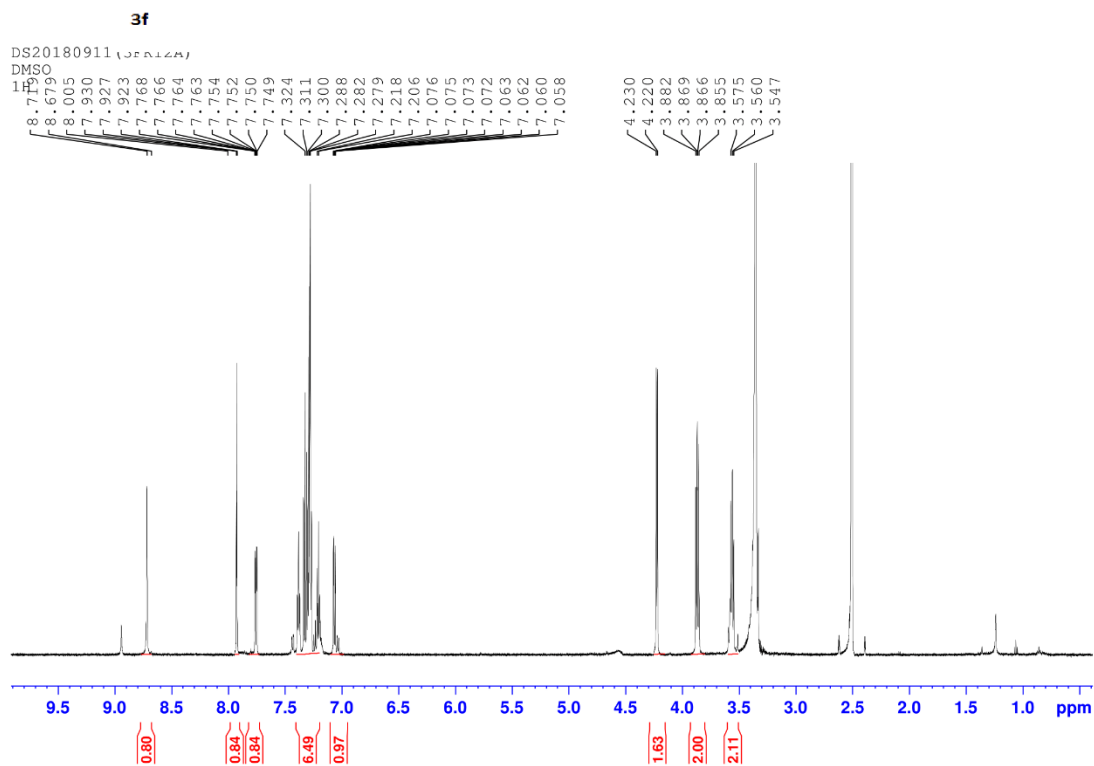

### Compound 3g

#### <sup>13</sup>C NMR spectrum

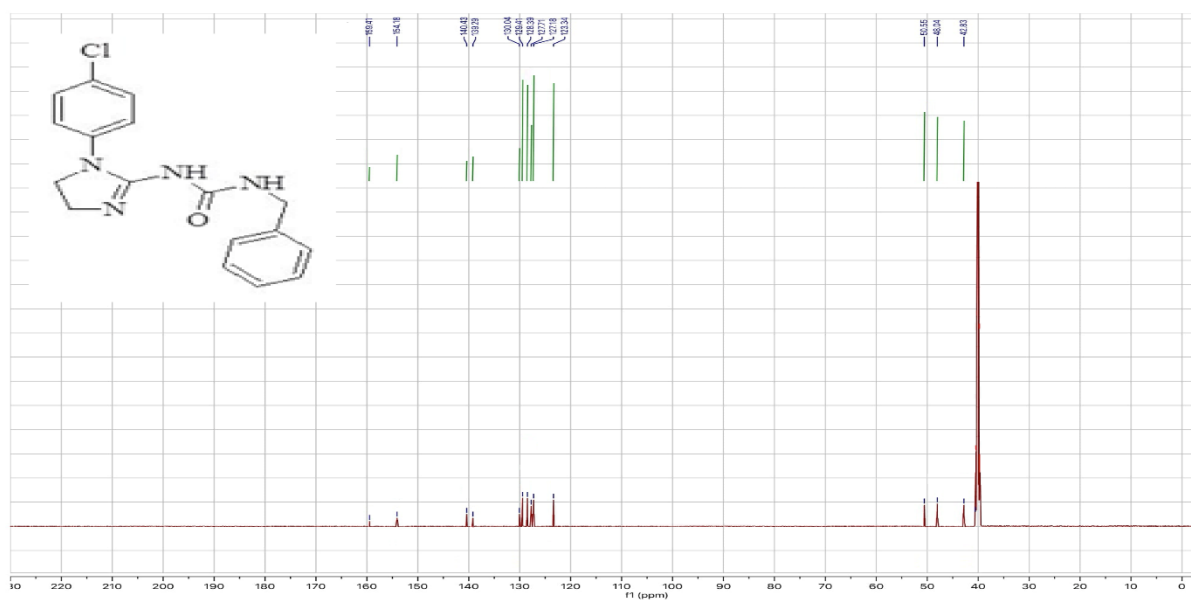

**MS spectrum:** C<sub>17</sub>H<sub>17</sub>ClN<sub>4</sub>O (m.m. calc. 329.1164). HRMS (ESI) *m/z* [M+H]<sup>+</sup>: 329.1158.

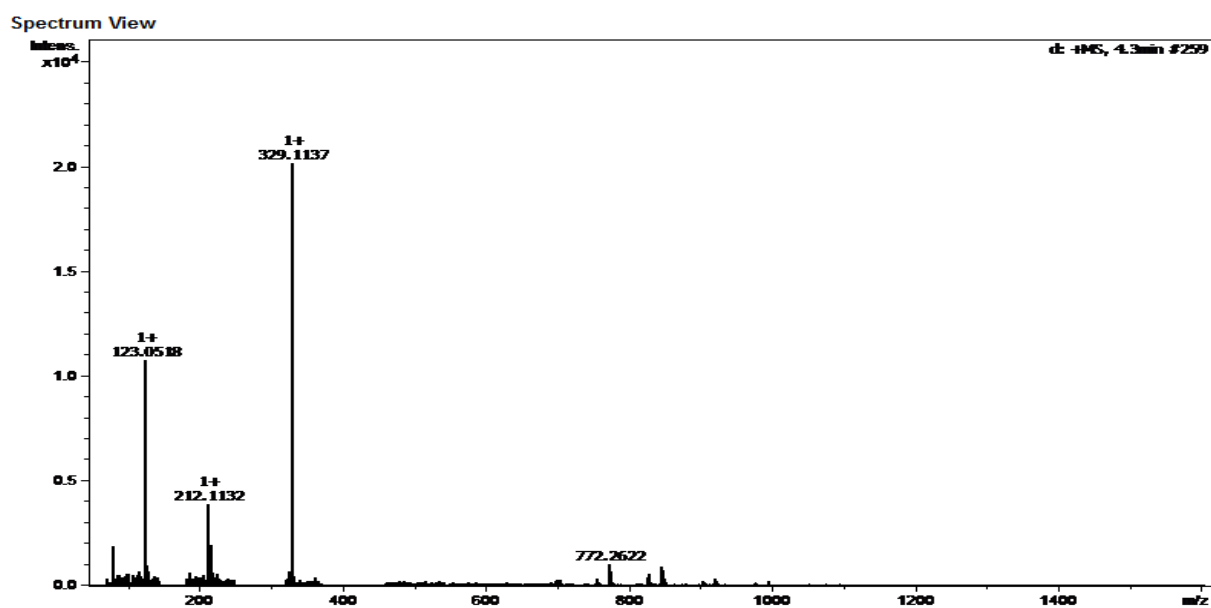

<sup>1</sup>H NMR spectrum

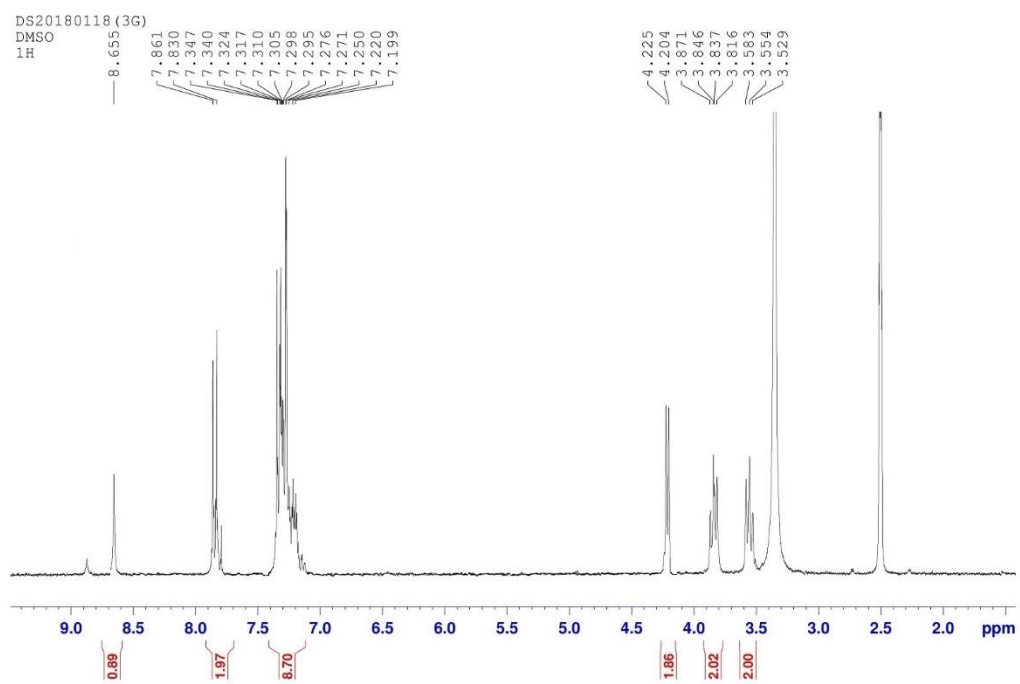

## Compound 4a

### <sup>13</sup>C NMR spectrum

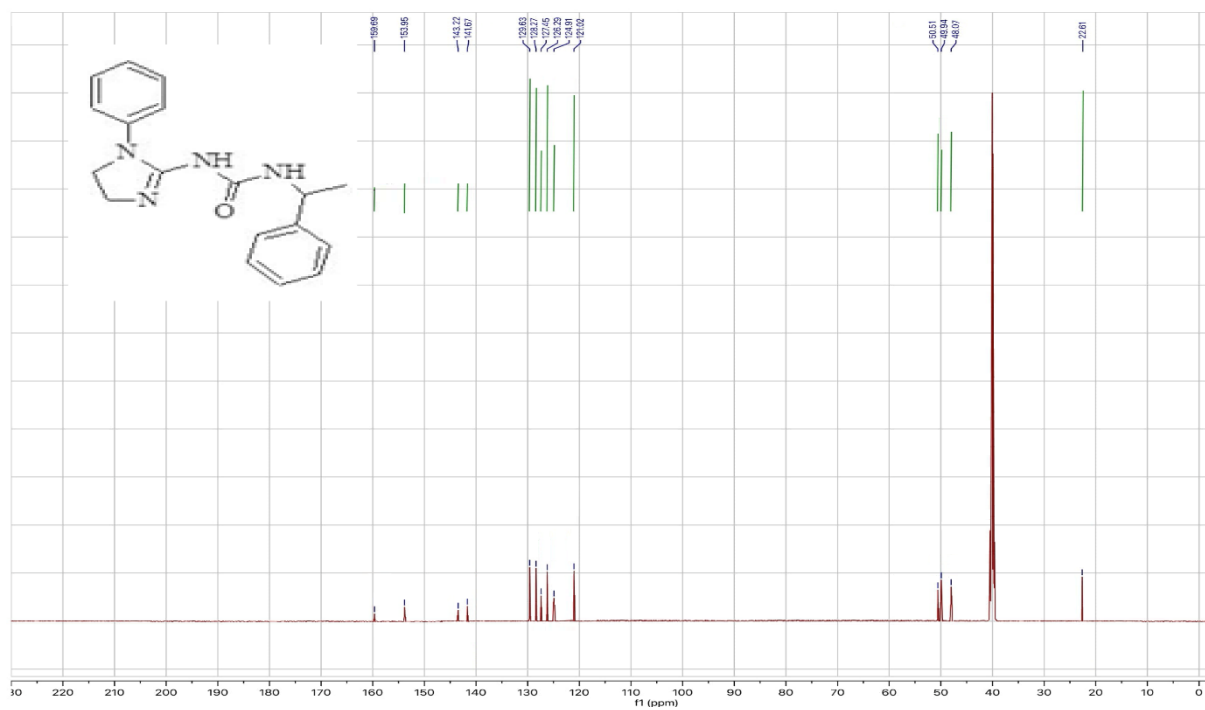

**MS spectrum:** C<sub>18</sub>H<sub>20</sub>N<sub>4</sub>O (m.m. calc. 309.1710). HRMS (ESI) *m/z* [M+H]<sup>+</sup>: 309.1667.

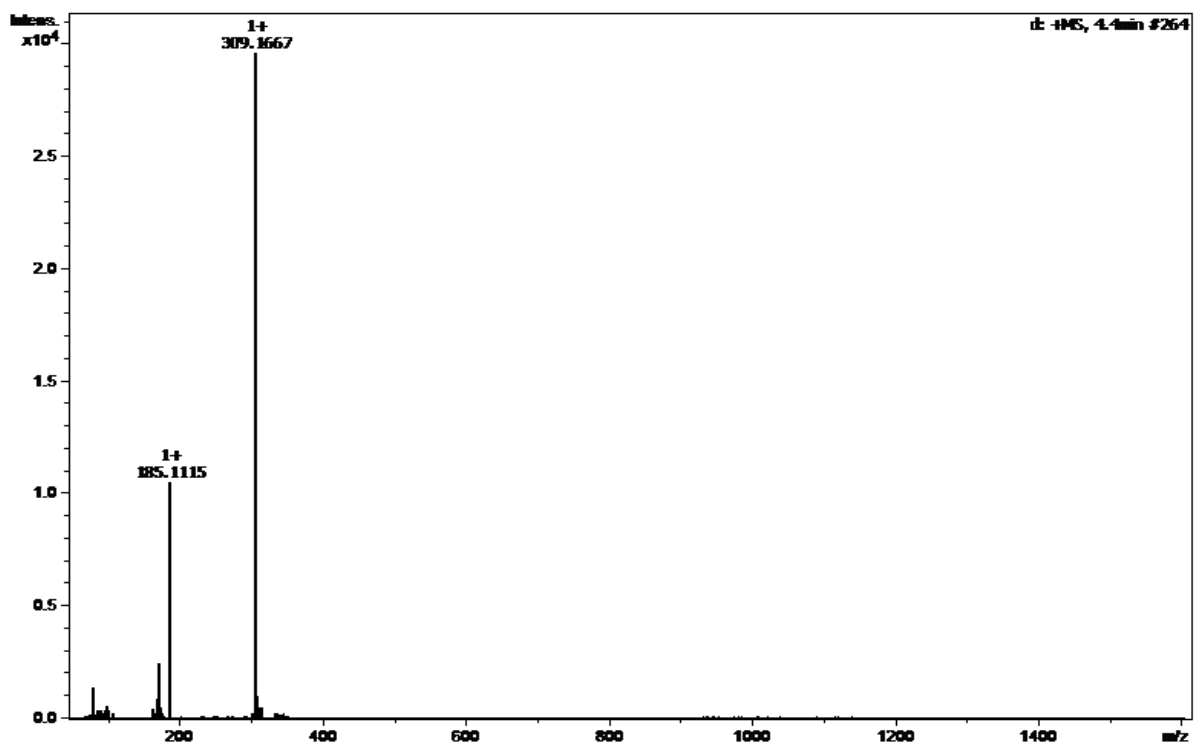

<sup>1</sup>H NMR spectrum

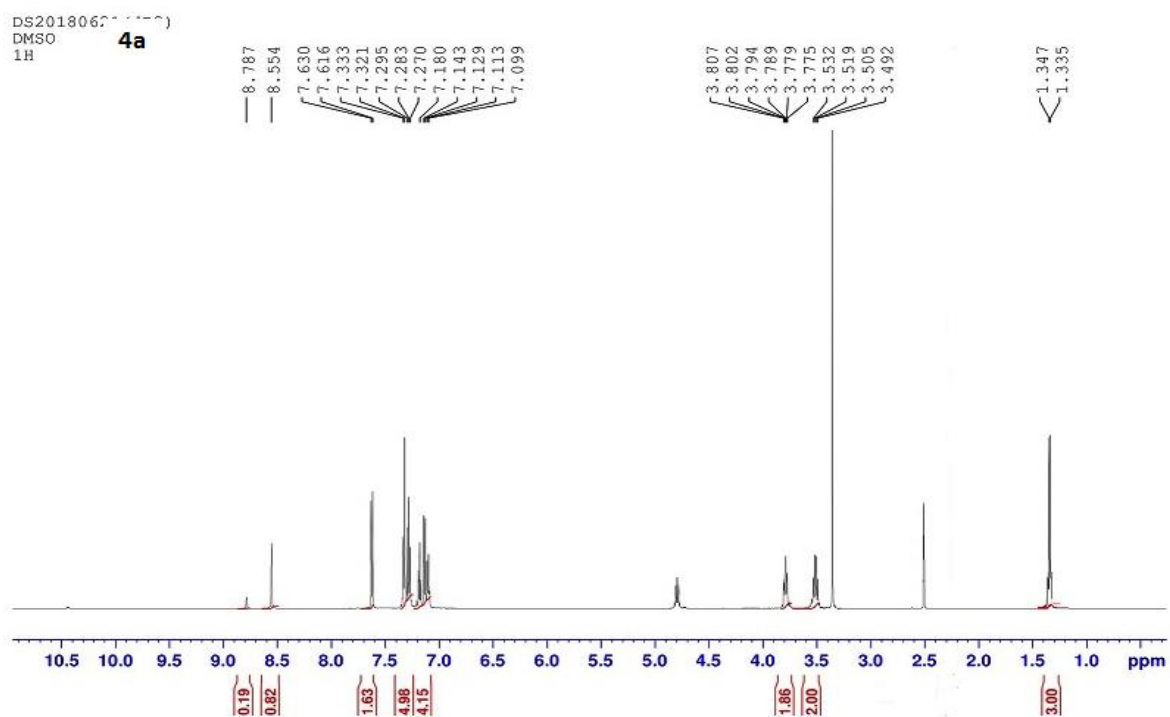

Compound 4b

### <sup>13</sup>C NMR spectrum

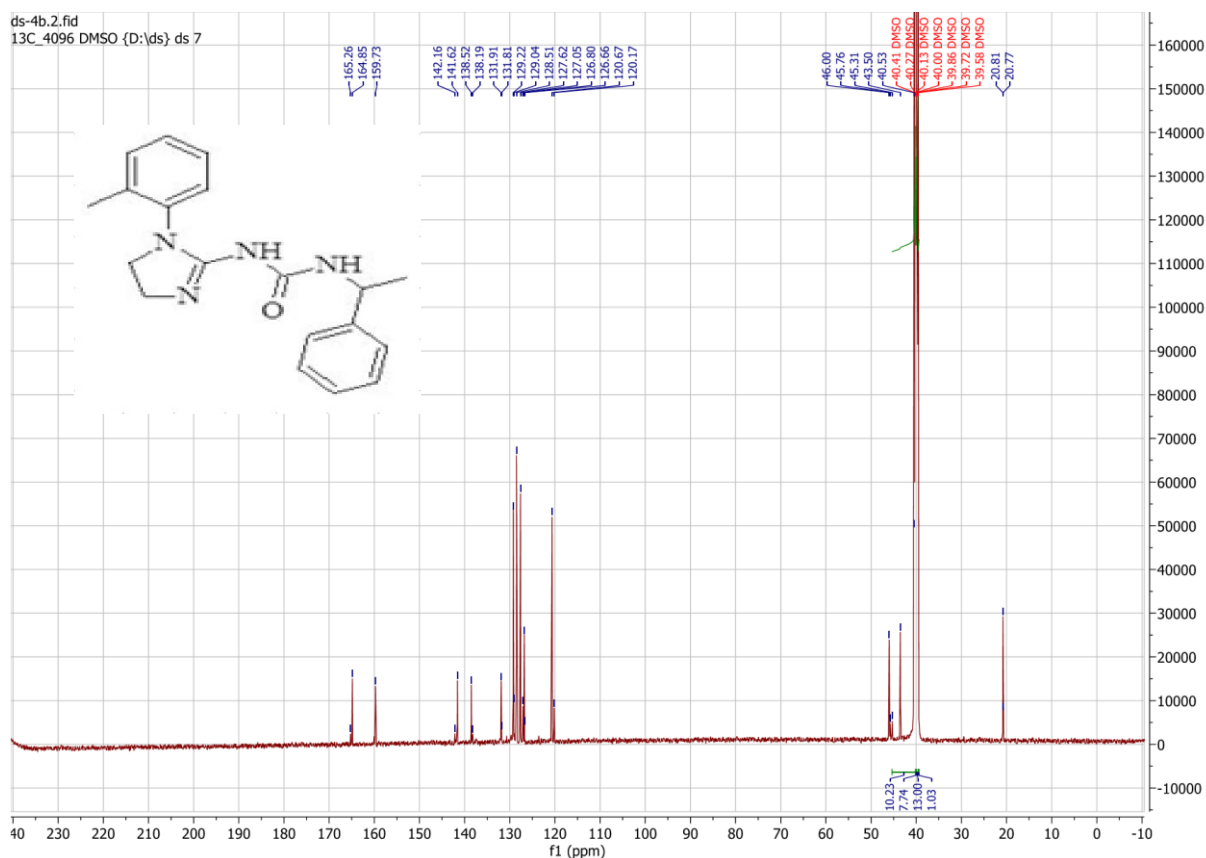

MS spectrum: C<sub>19</sub>H<sub>22</sub>N<sub>4</sub>O (m.m. calc. 323.1866). HRMS (ESI)  $m/z$  [M+H]<sup>+</sup>: 323.1820.

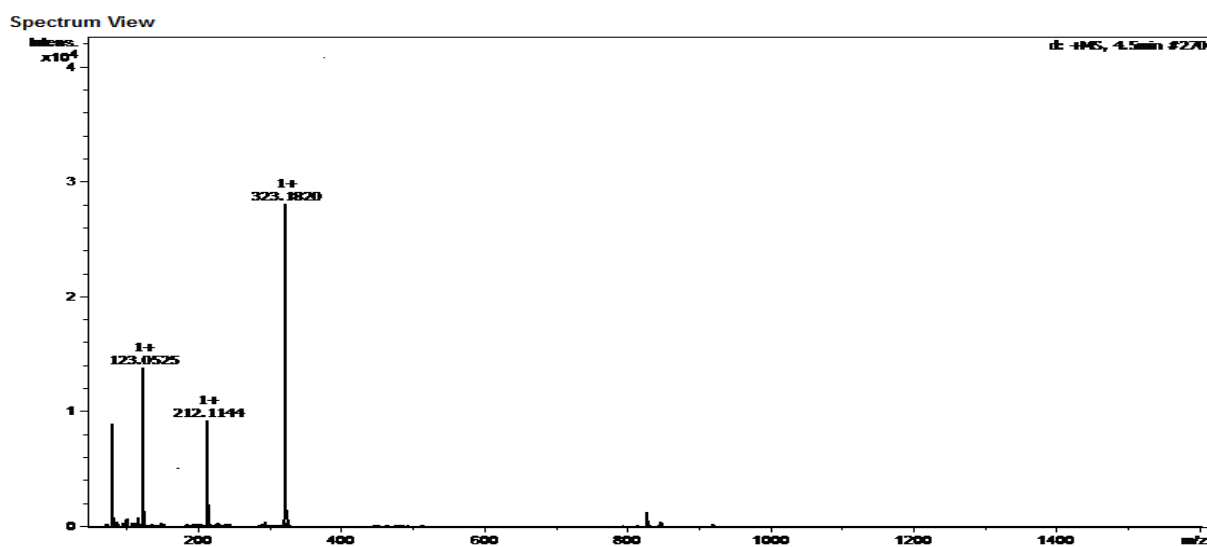

### <sup>1</sup>H NMR spectrum

DS2018072  
DMSO  
1H

**4b**

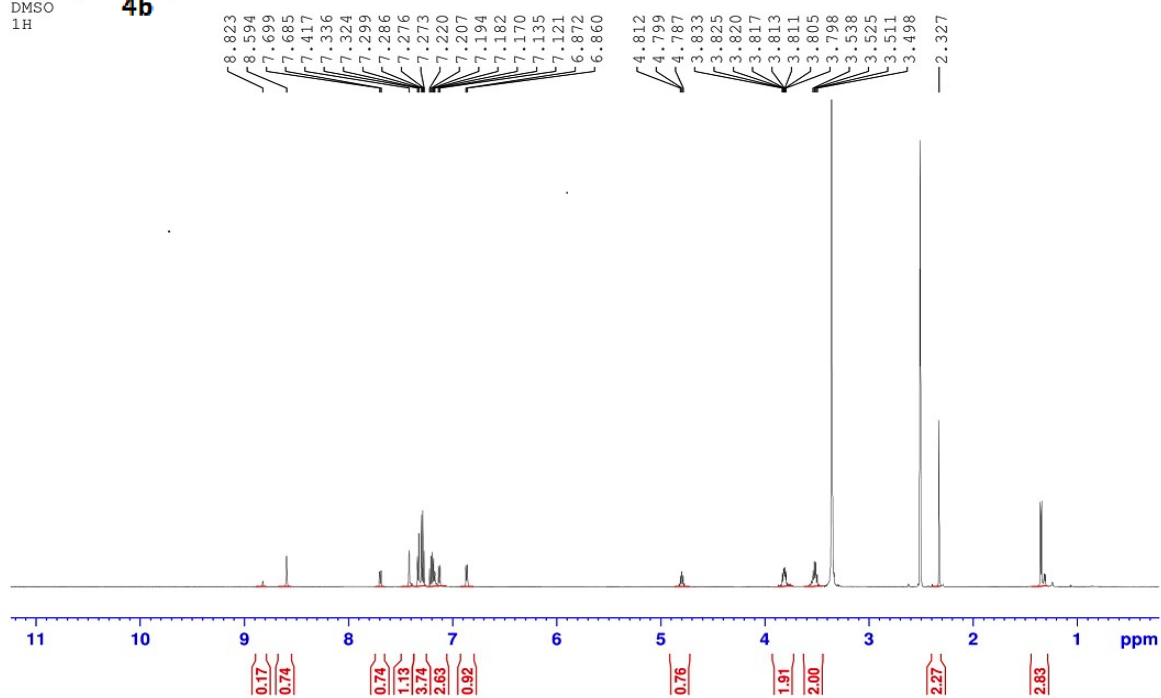

**Compound 4c**

<sup>13</sup>C NMR spectrum

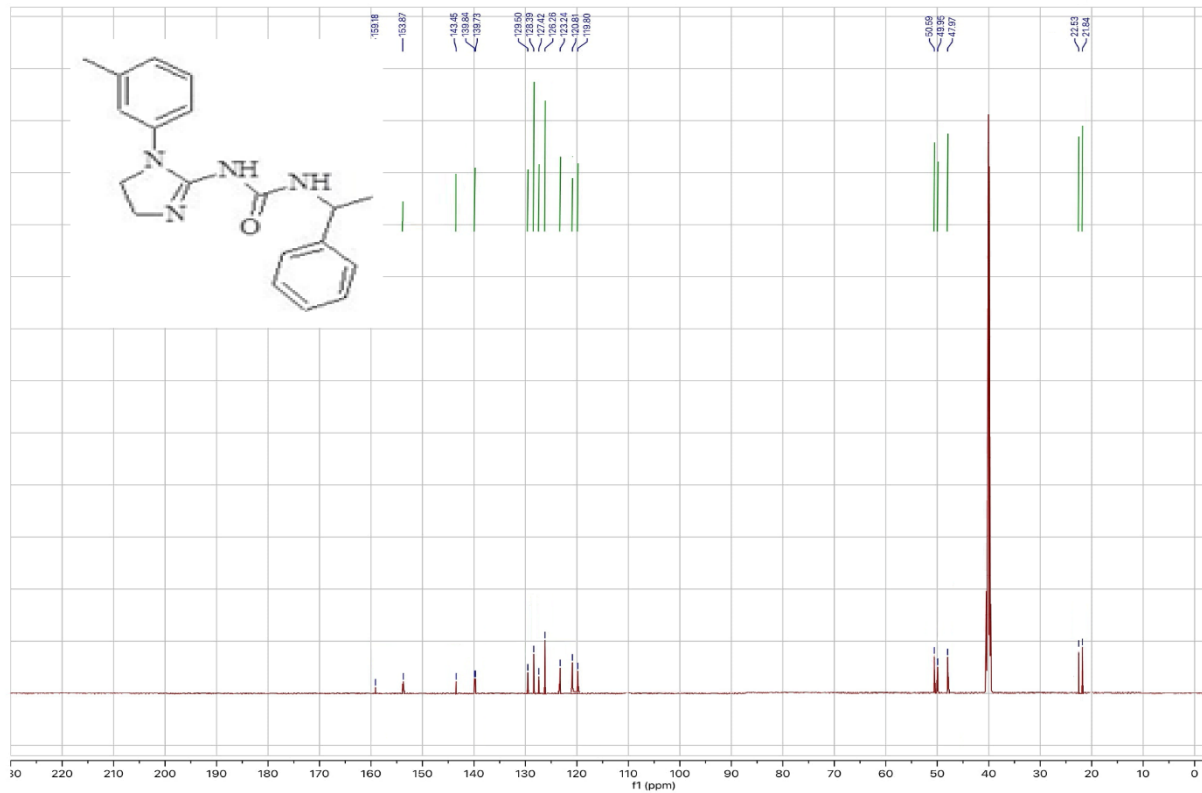

**MS spectrum:** C<sub>19</sub>H<sub>22</sub>N<sub>4</sub>O (m.m. calc. 323.1866). HRMS (ESI) *m/z* [M+H]<sup>+</sup>: 323.1850.

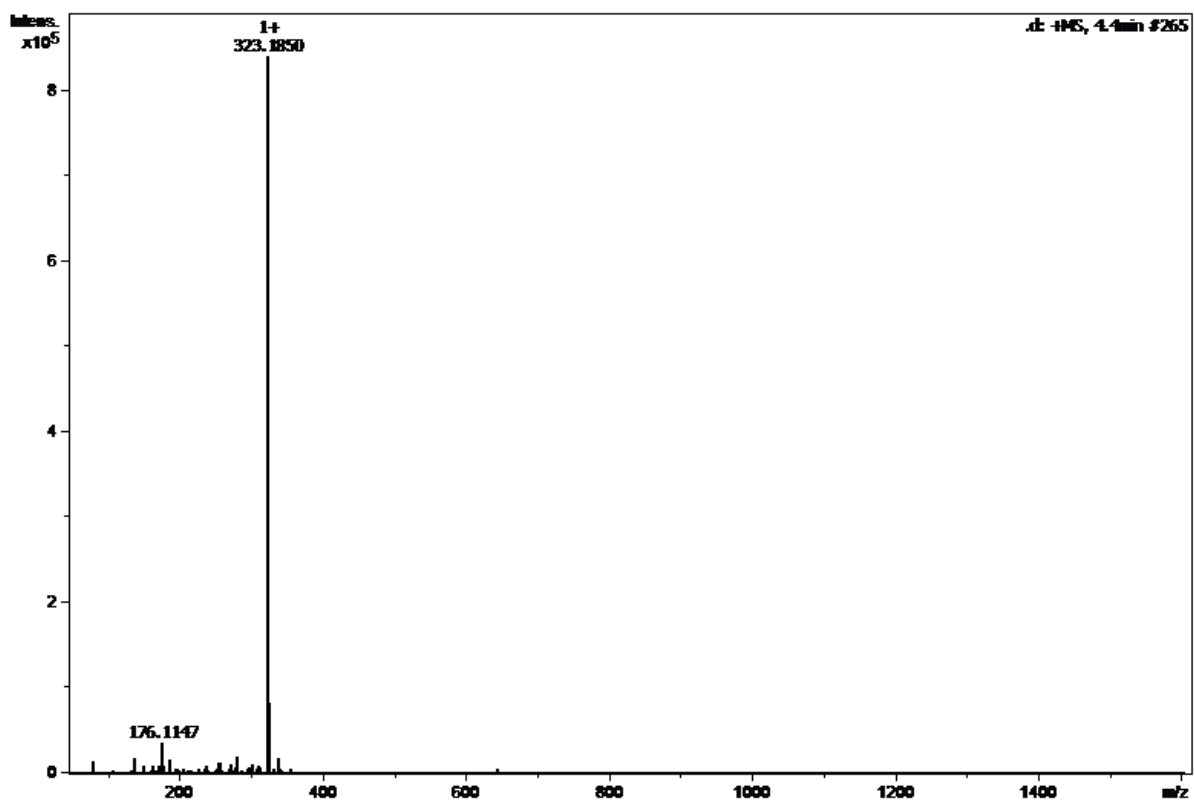

<sup>1</sup>H NMR spectrum

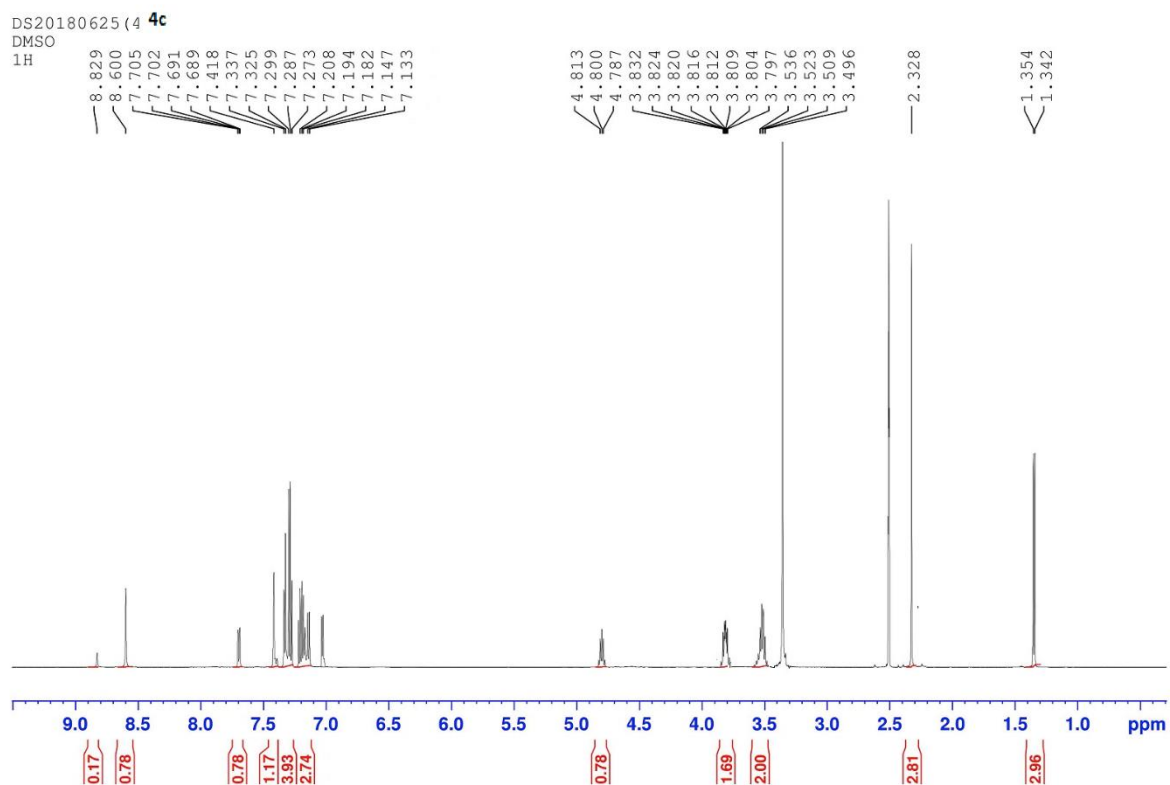

Compound 4d

<sup>13</sup>C NMR spectrum

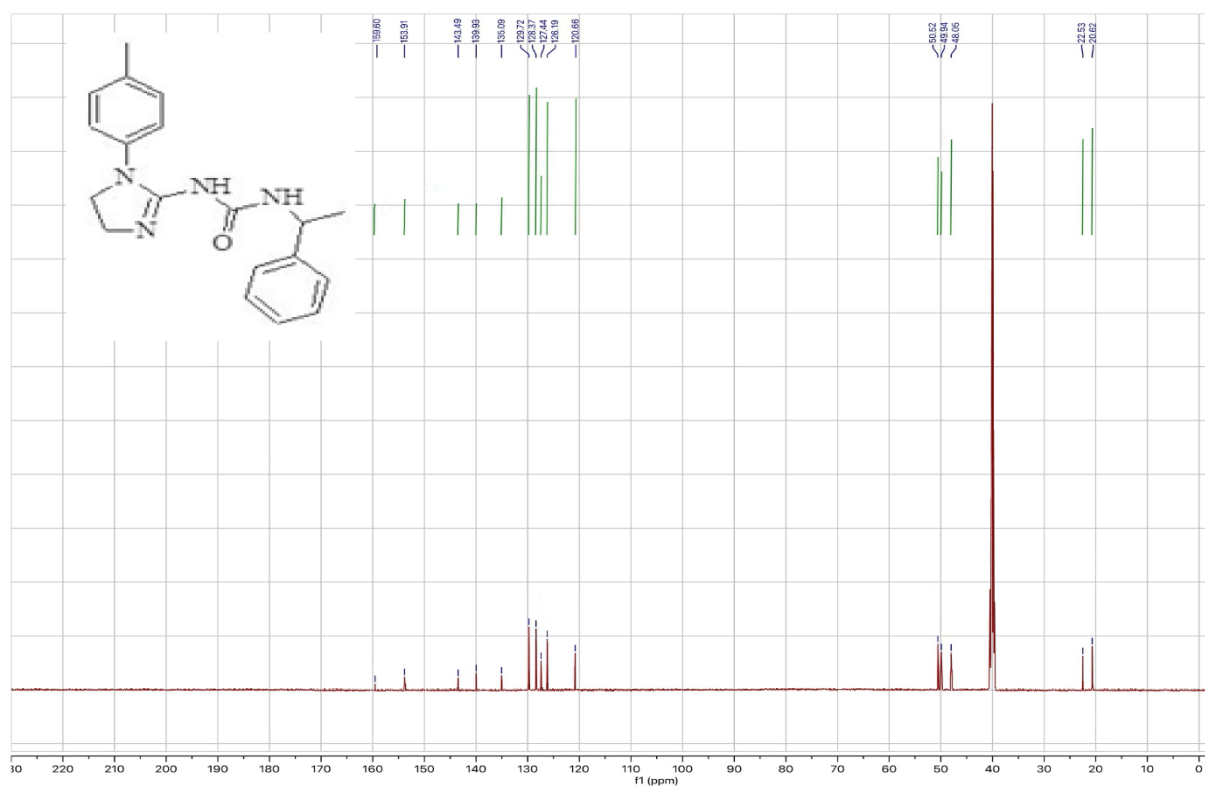

MS spectrum: C<sub>19</sub>H<sub>22</sub>N<sub>4</sub>O (m.m. calc. 323.1866). HRMS (ESI)  $m/z$  [M+H]<sup>+</sup>: 323.1545.

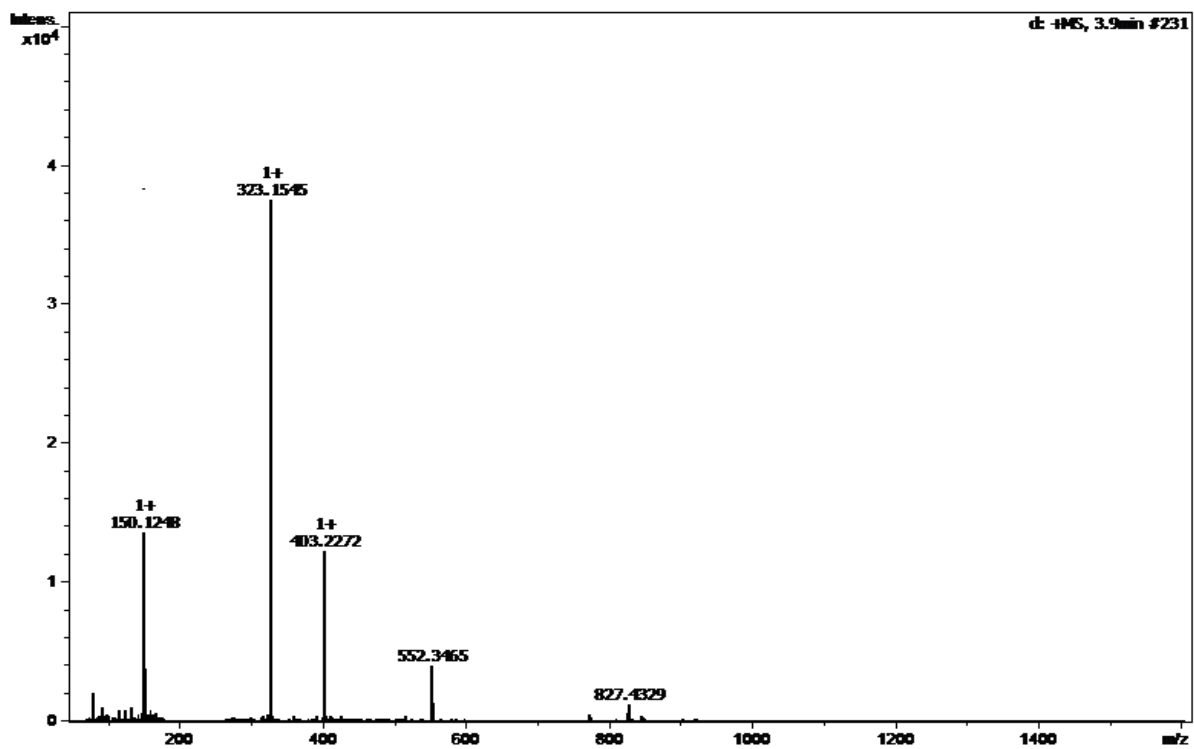

<sup>1</sup>H NMR spectrum



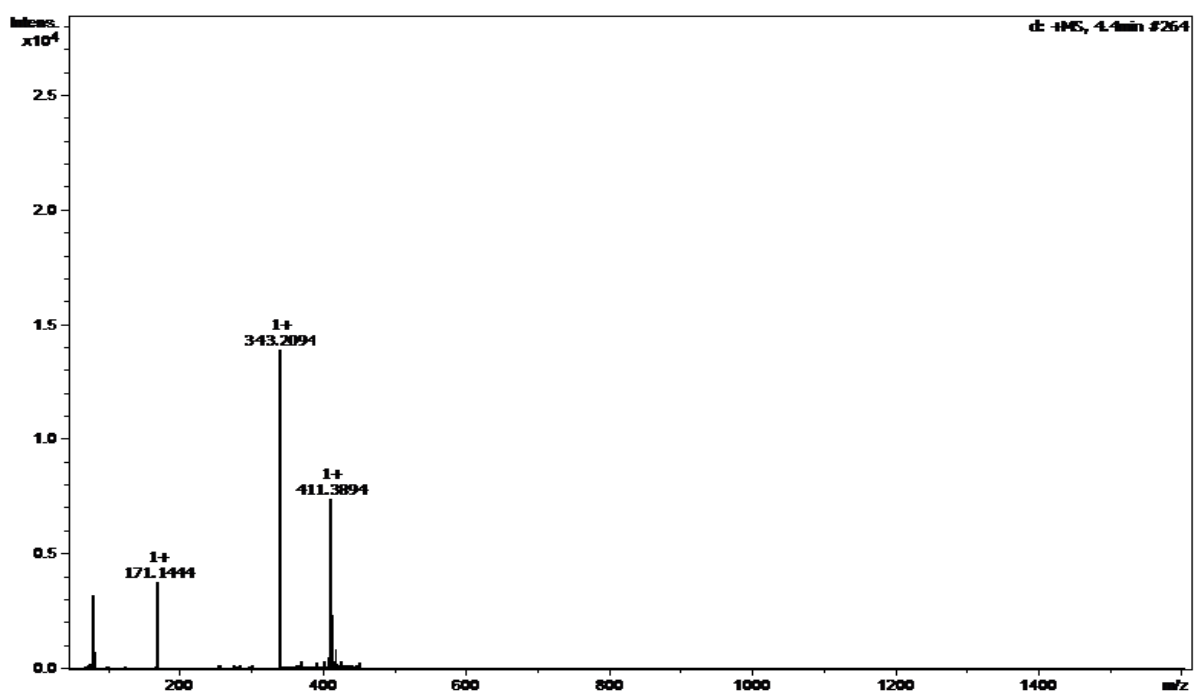

<sup>1</sup>H NMR spectrum

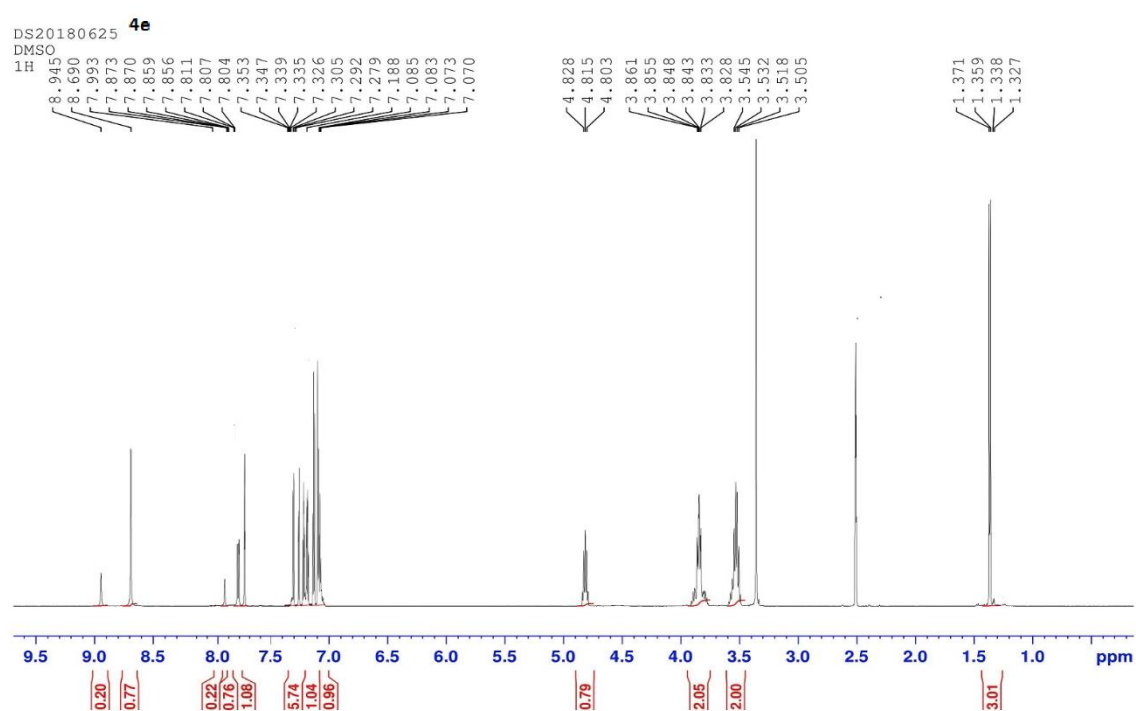

Compound 4f

<sup>13</sup>C NMR spectrum

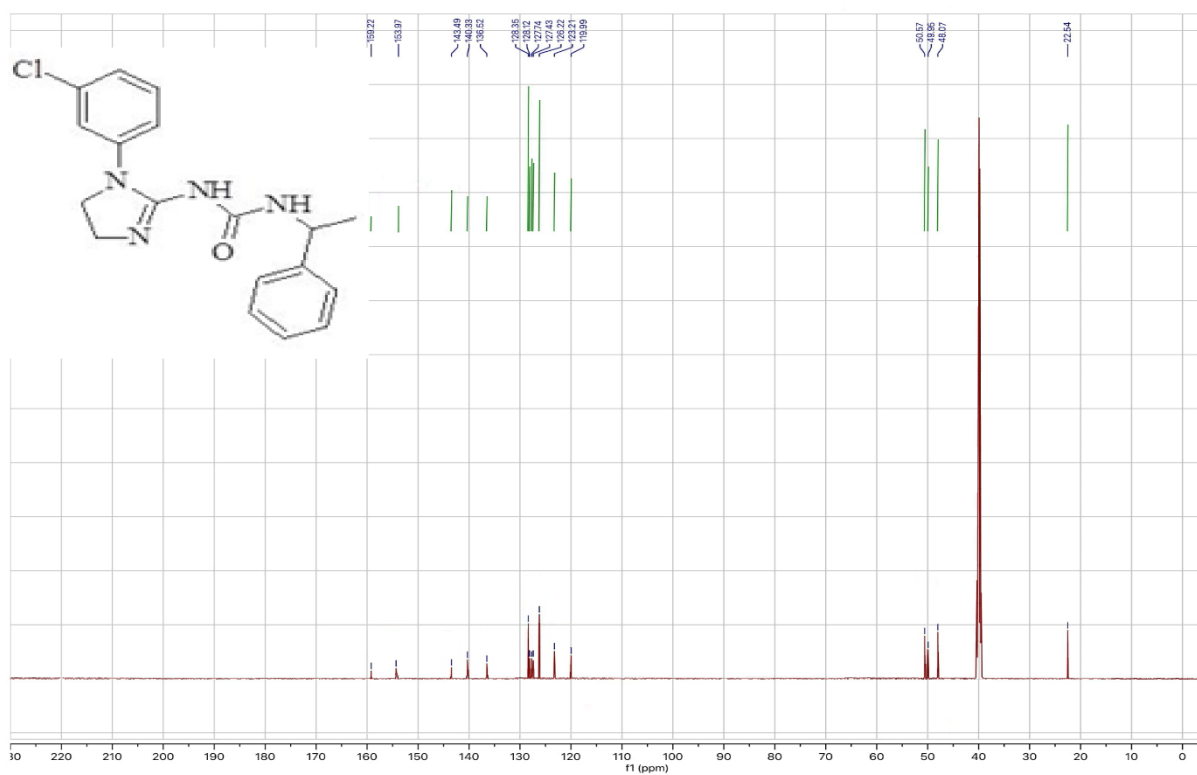

MS spectrum: C<sub>18</sub>H<sub>19</sub>ClN<sub>4</sub>O (m.m. calc. 343.1320). HRMS (ESI) *m/z* [M+H]<sup>+</sup>: 343.1365.

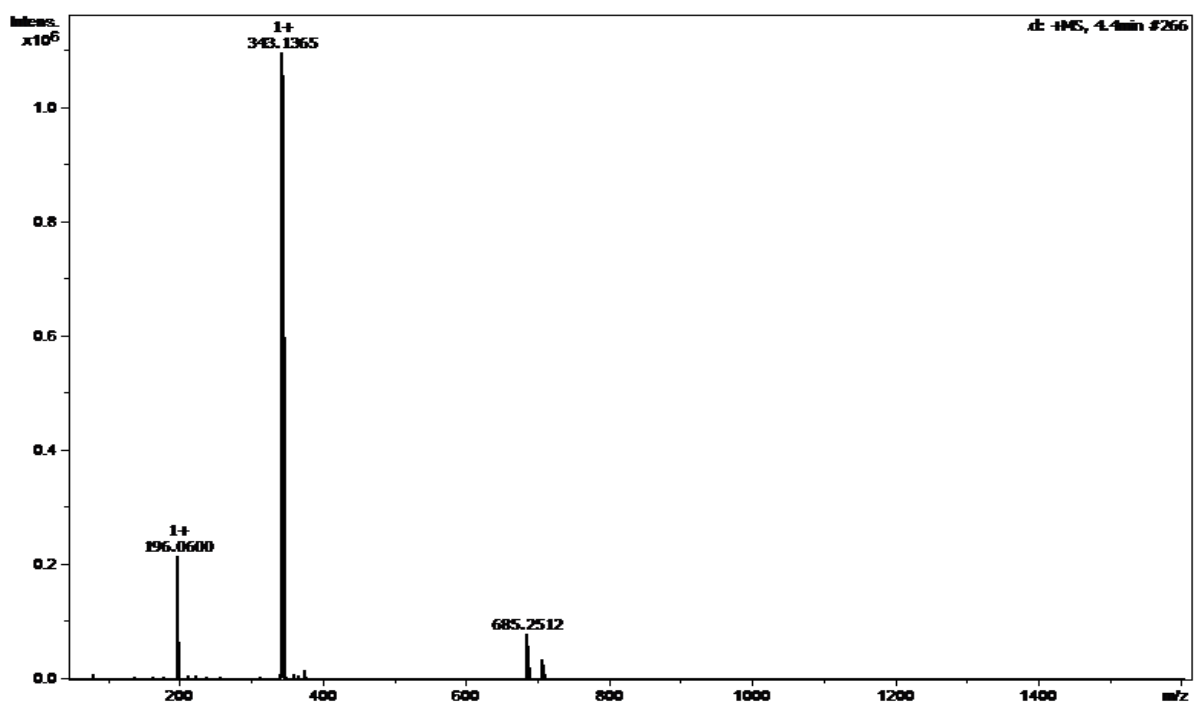

<sup>1</sup>H NMR spectrum

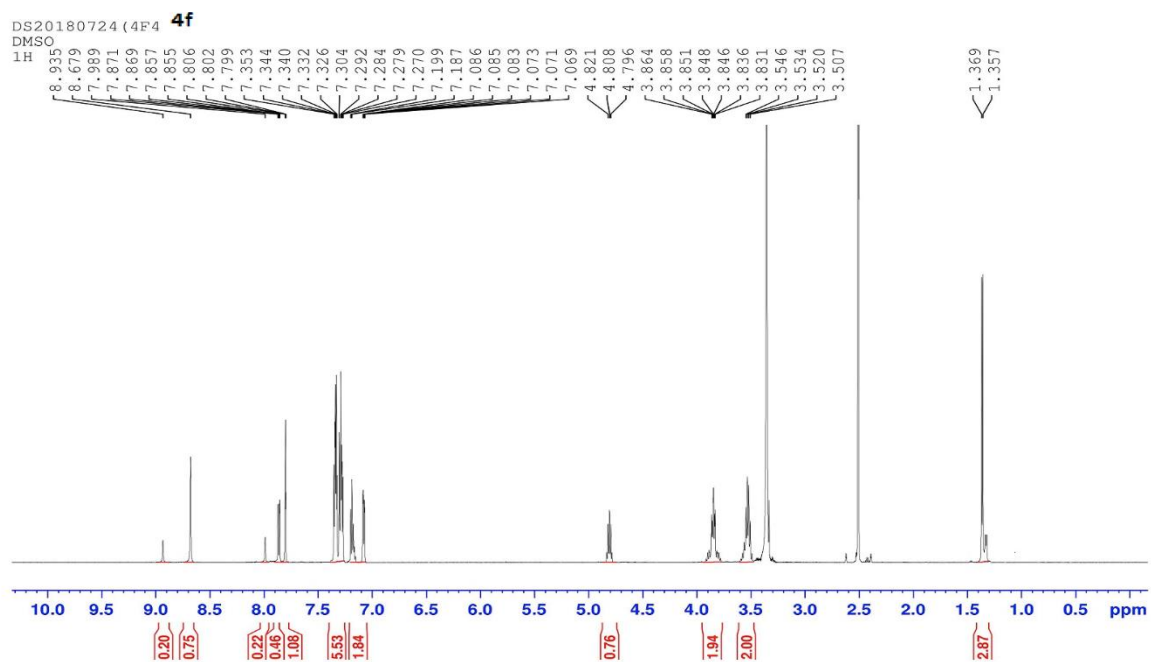

### Compound 4g

### <sup>13</sup>C NMR spectrum

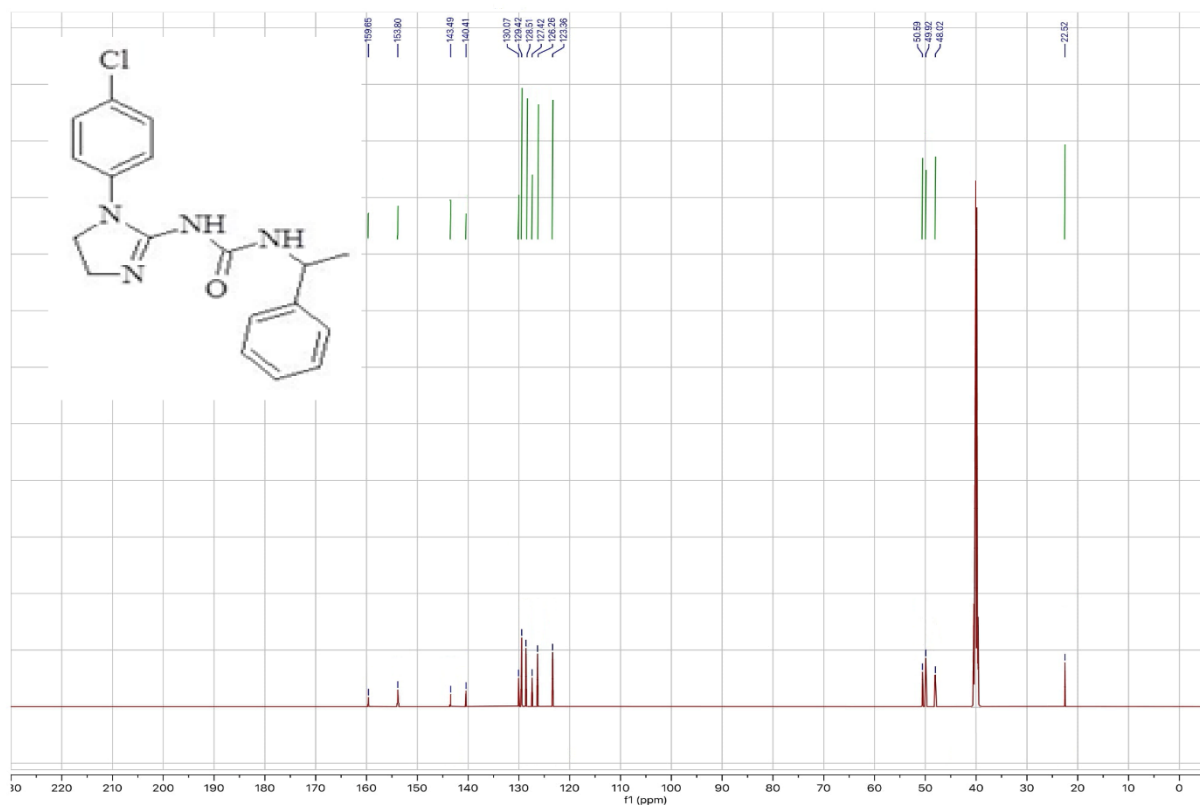

MS spectrum: C<sub>18</sub>H<sub>19</sub>ClN<sub>4</sub>O (m.m. calc. 343.1320). HRMS (ESI) *m/z* [M+H]<sup>+</sup>: 343.1291.

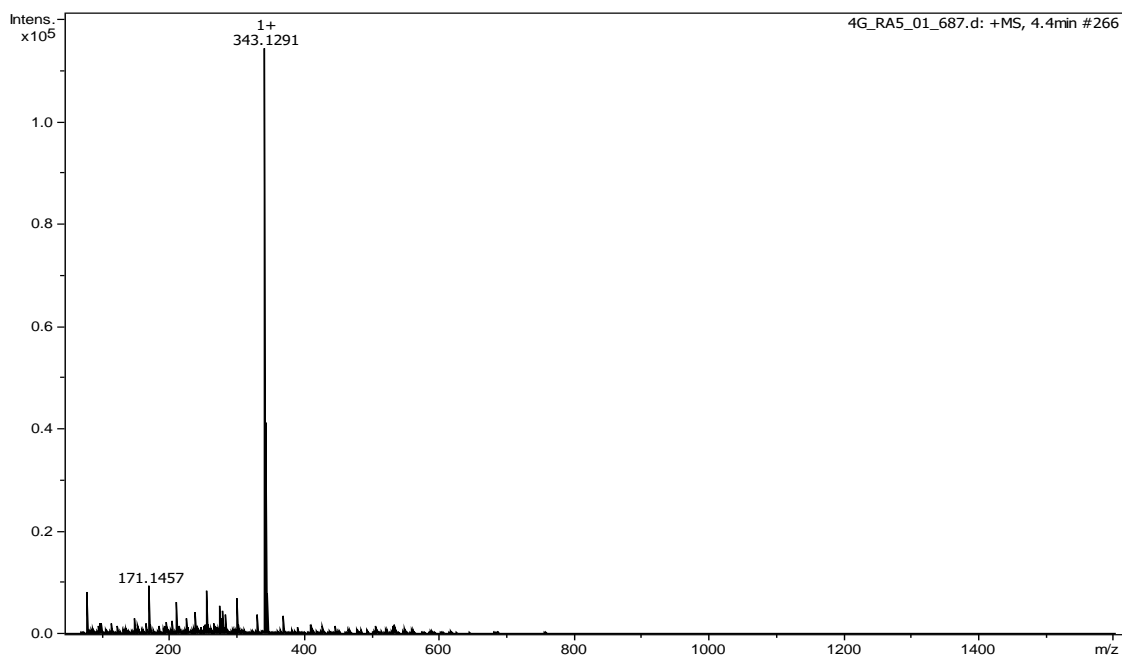

# <sup>1</sup>H NMR spectrum

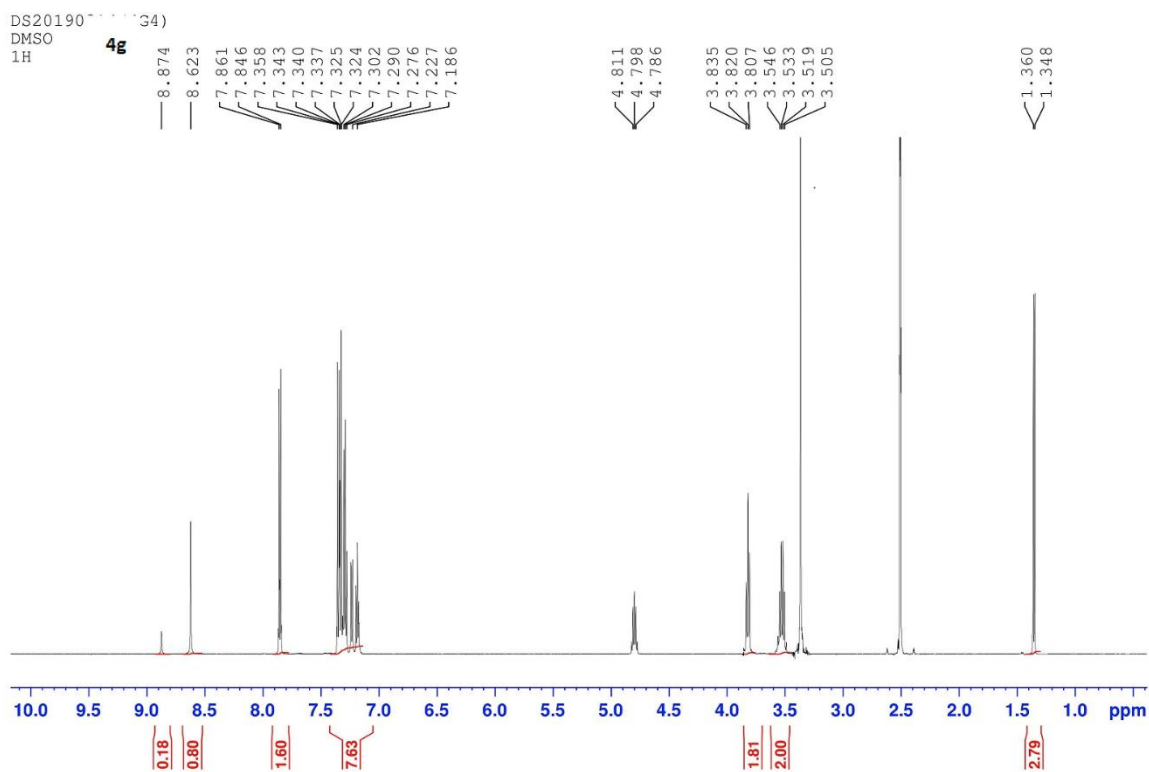

## Compound 5a

**$^{13}\text{C}$  NMR spectrum**

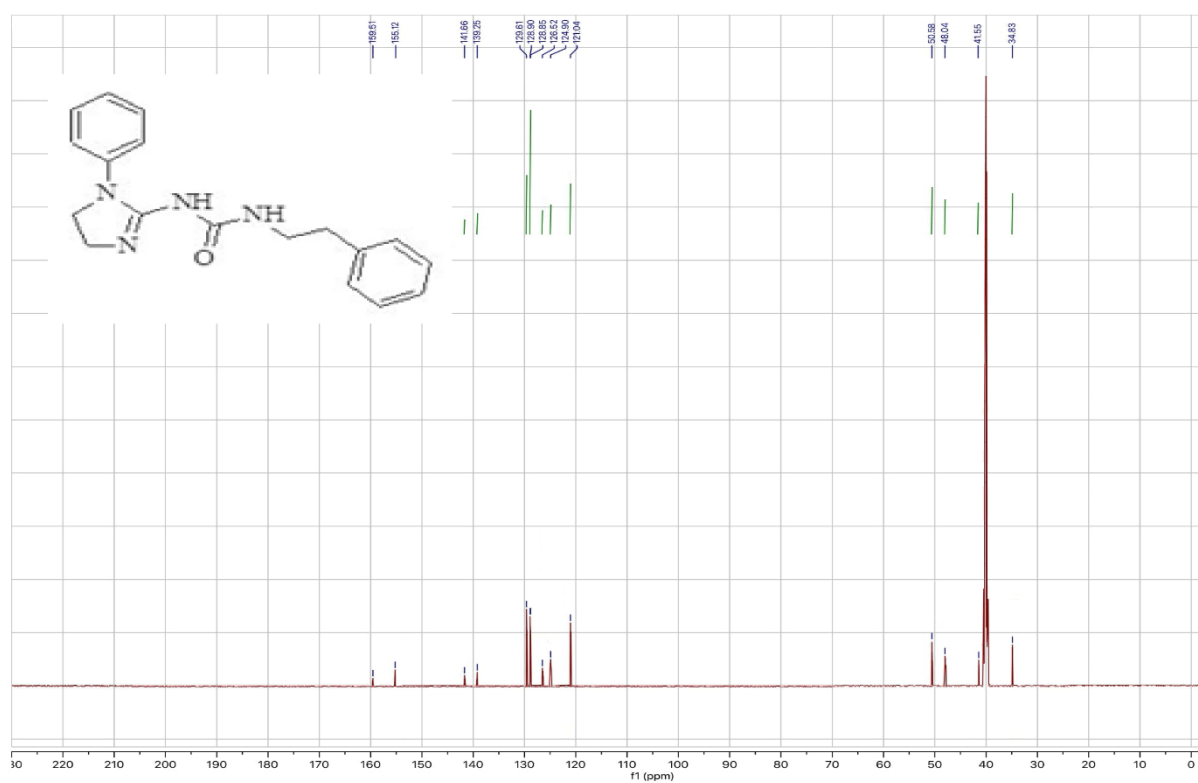

**MS spectrum:** Formula  $\text{C}_{18}\text{H}_{20}\text{N}_4\text{O}$  (m.m. calc. 309.1710). HRMS (ESI)  $m/z$   $[\text{M}+\text{H}]^+$ : 309.1688.

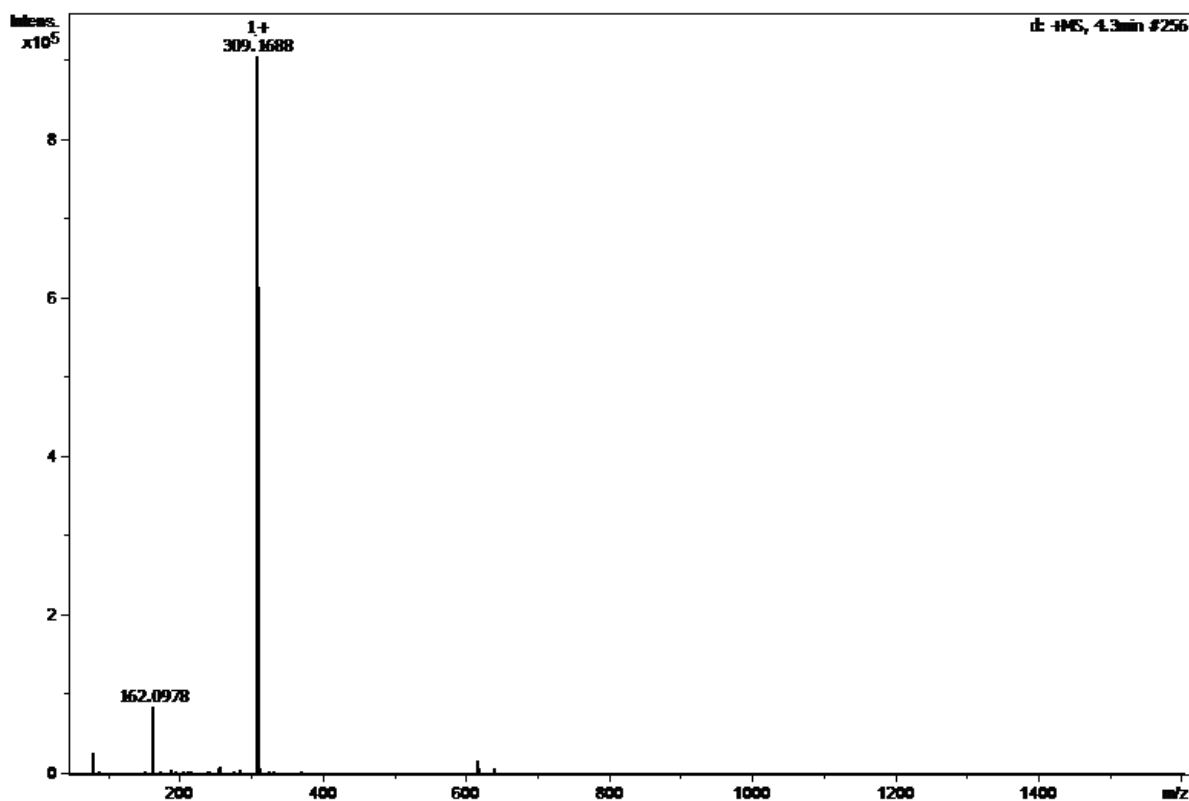

**$^1\text{H}$  NMR spectrum**



**MS spectrum:** C<sub>19</sub>H<sub>22</sub>N<sub>4</sub>O (m.m. calc. 323.1866). HRMS (ESI) *m/z* [M+H]<sup>+</sup>: 323.2229.

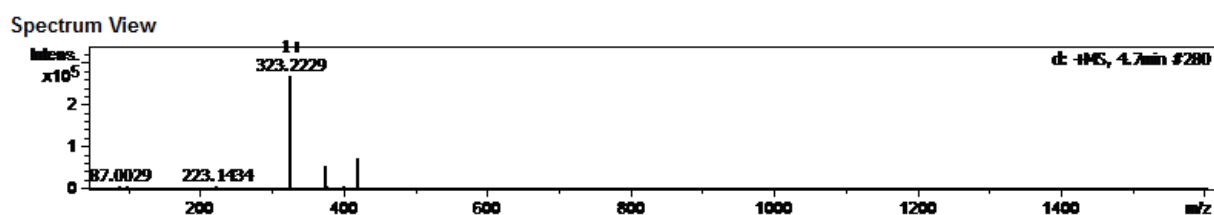

**<sup>1</sup>H NMR spectrum**

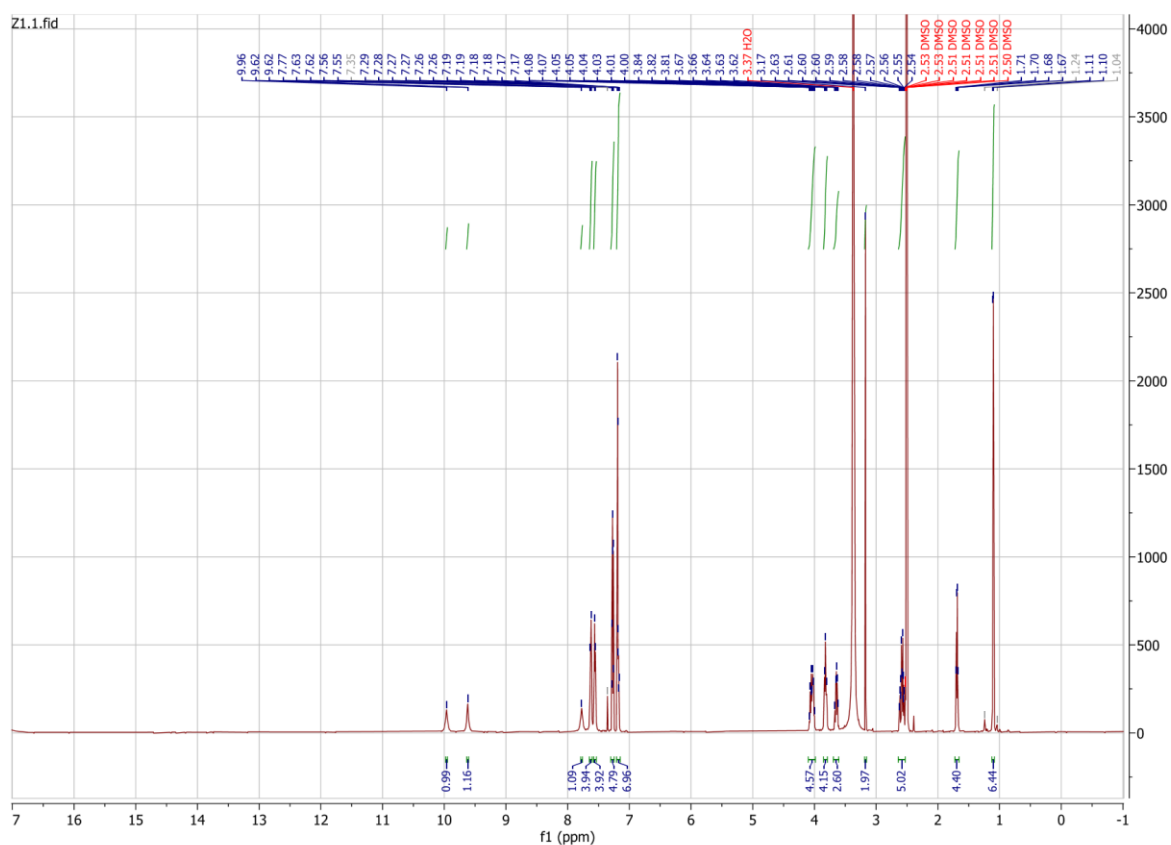

**$^{13}\text{C}$  NMR spectrum**

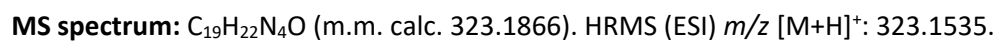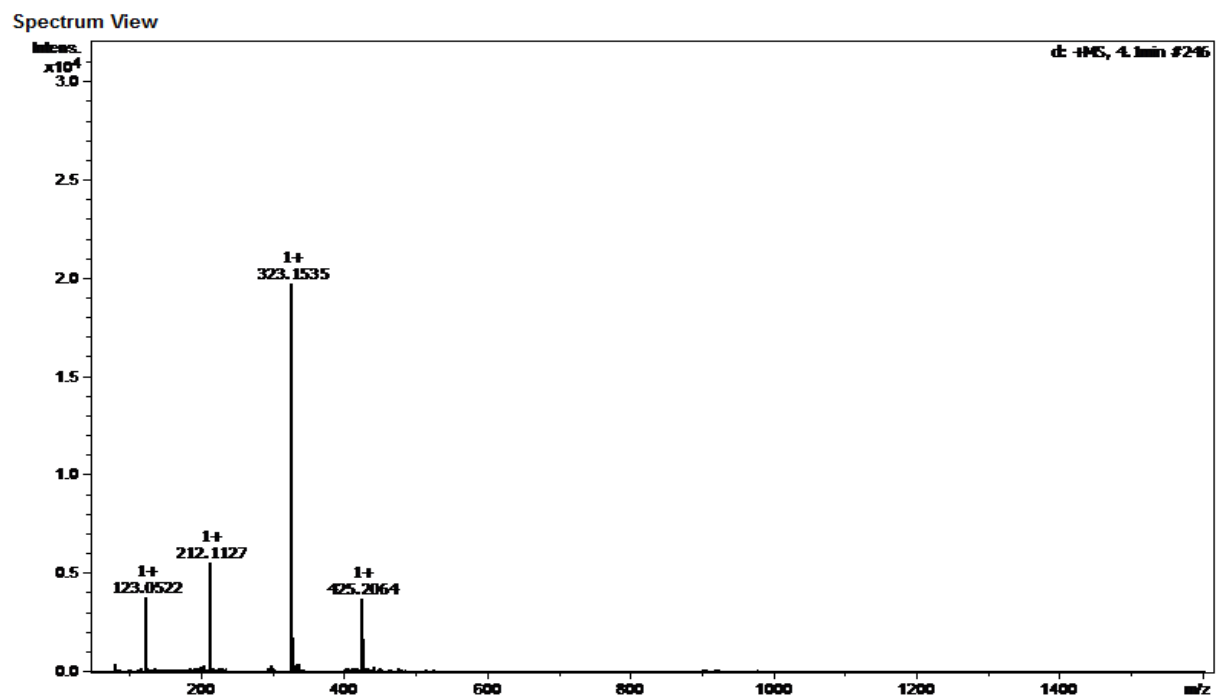

# <sup>1</sup>H NMR spectrum

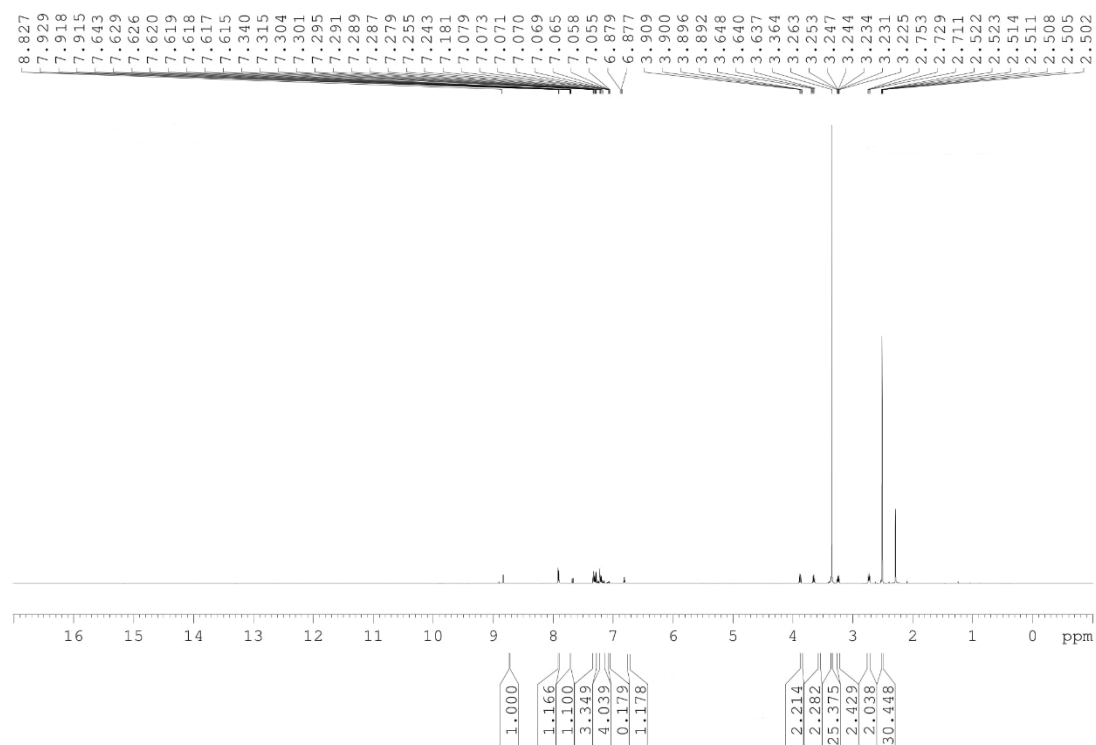

## Compound 5d

# <sup>13</sup>C NMR spectrum

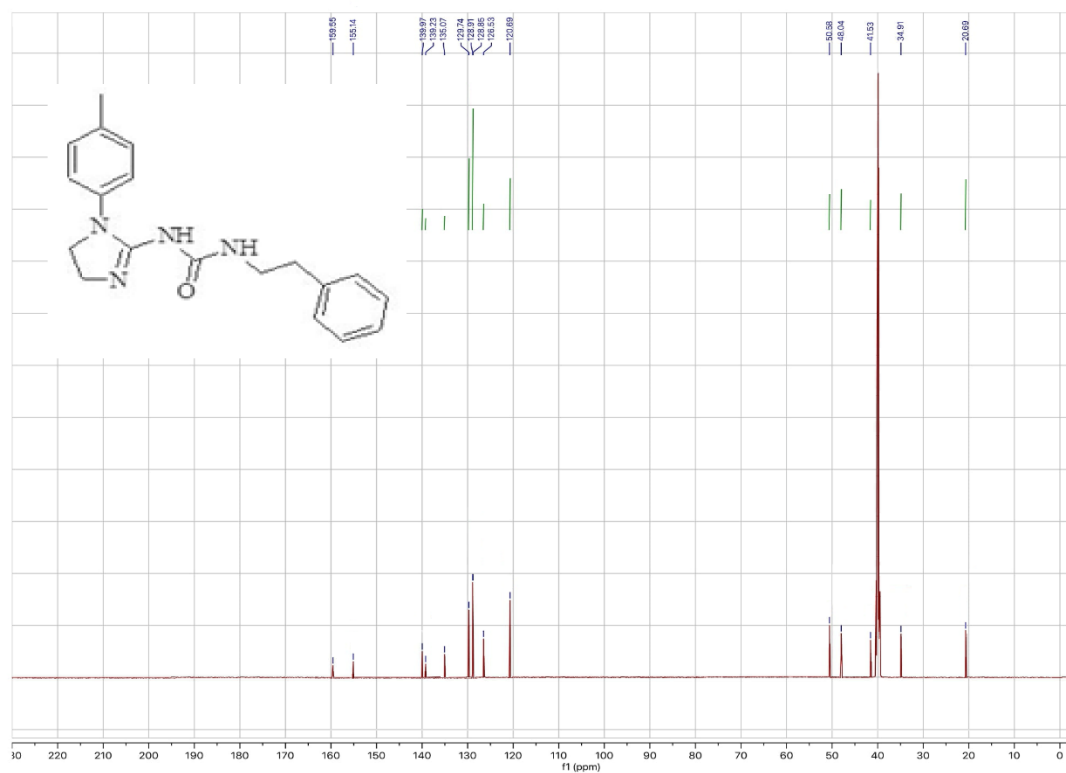

MS spectrum: C<sub>19</sub>H<sub>22</sub>N<sub>4</sub>O (m.m. calc. 323.1866). HRMS (ESI) *m/z* [M+H]<sup>+</sup> 323.1534.

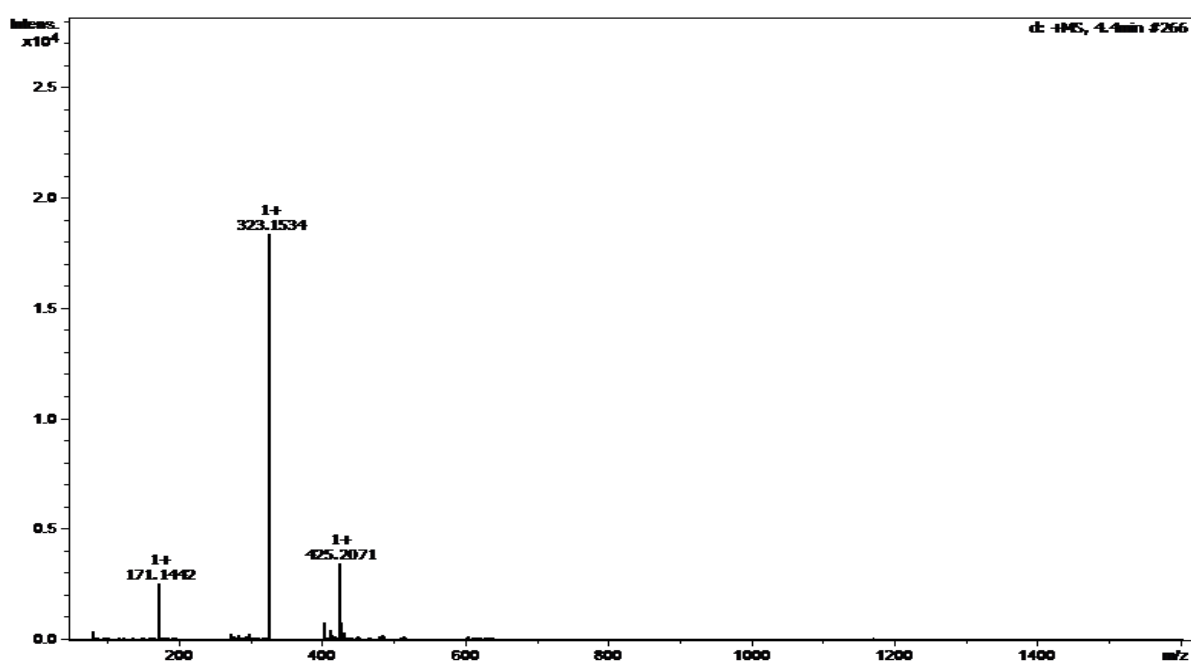

<sup>1</sup>H NMR spectrum

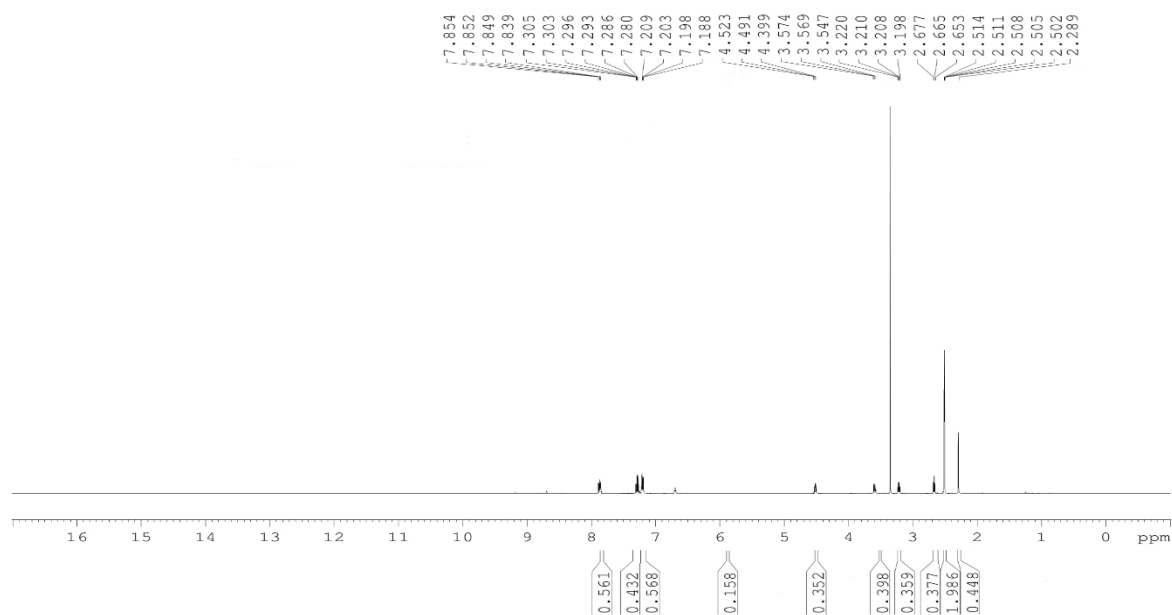

# Compound 5e

## <sup>13</sup>C NMR spectrum

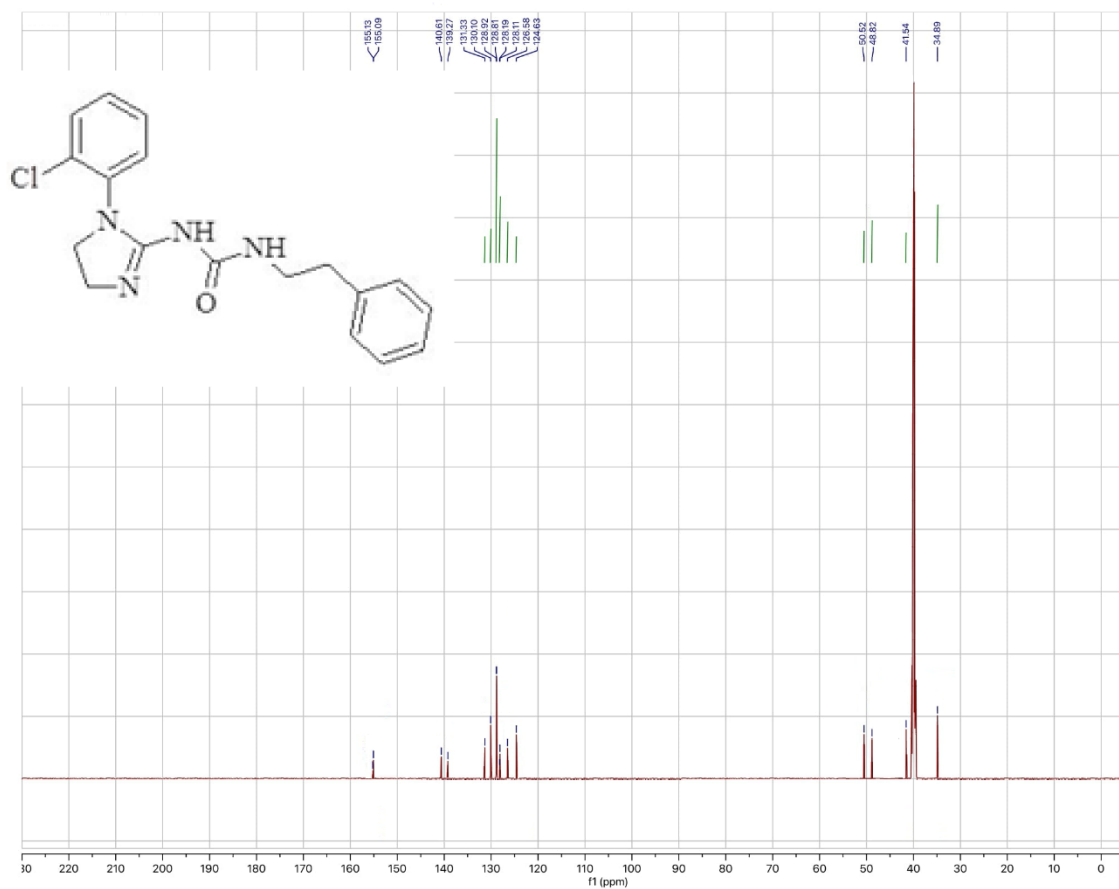

MS spectrum: C<sub>18</sub>H<sub>19</sub>ClN<sub>4</sub>O (m.m. calc. 343.1320). HRMS (ESI) *m/z* [M+H]<sup>+</sup>: 343.1271.

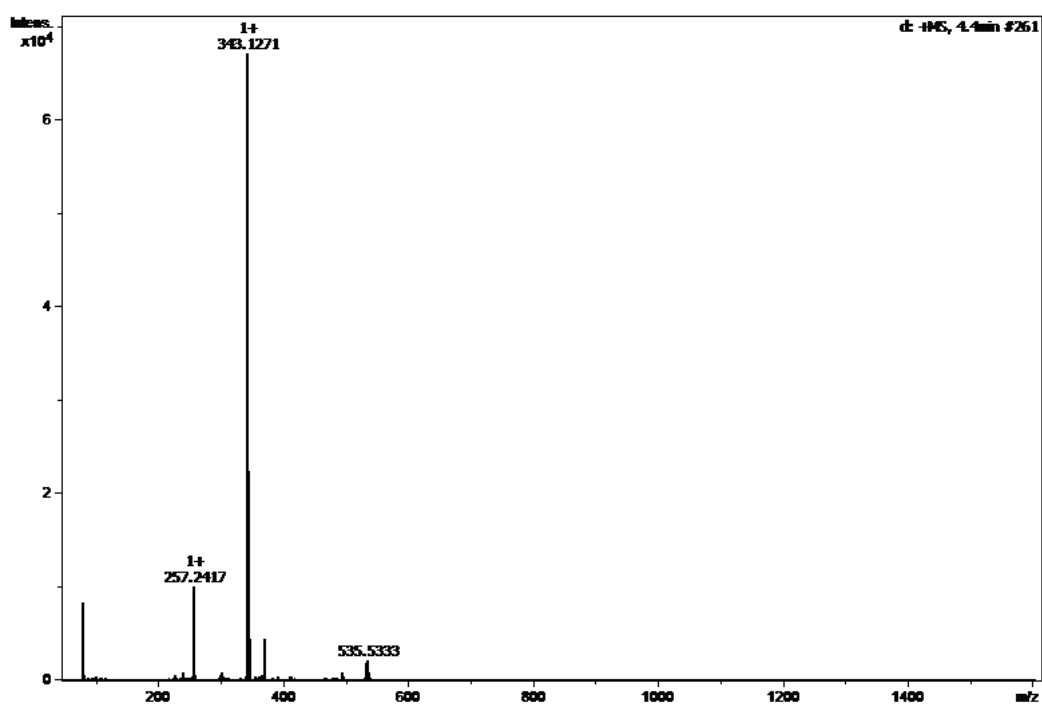

# <sup>1</sup>H NMR spectrum

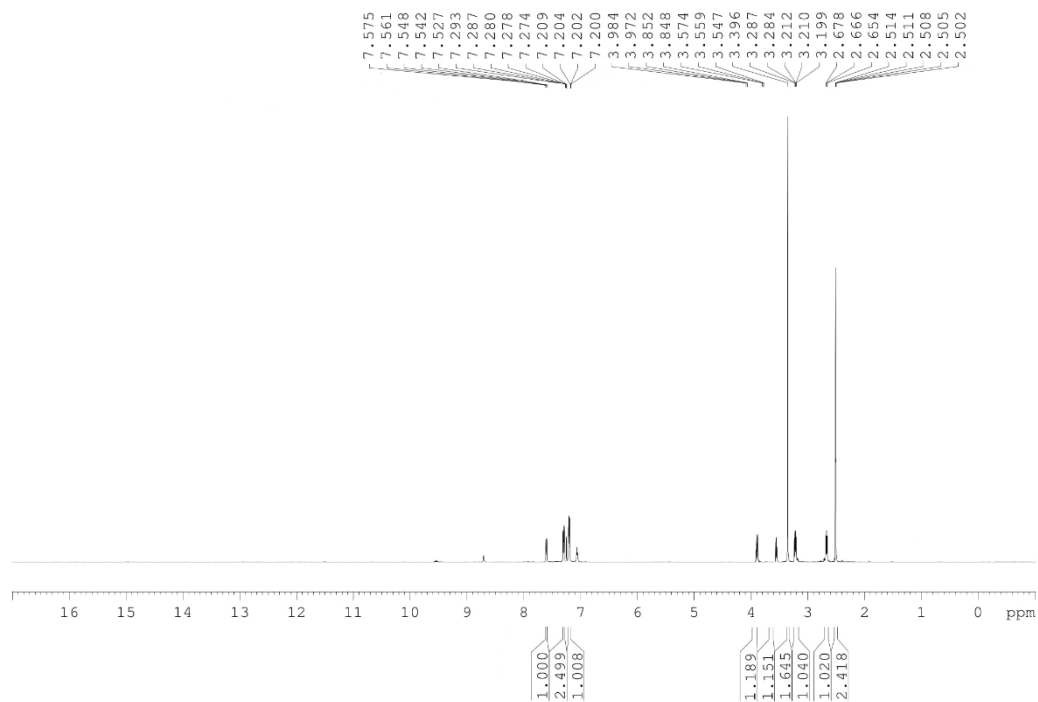

## Compound 5f

# <sup>13</sup>C NMR spectrum

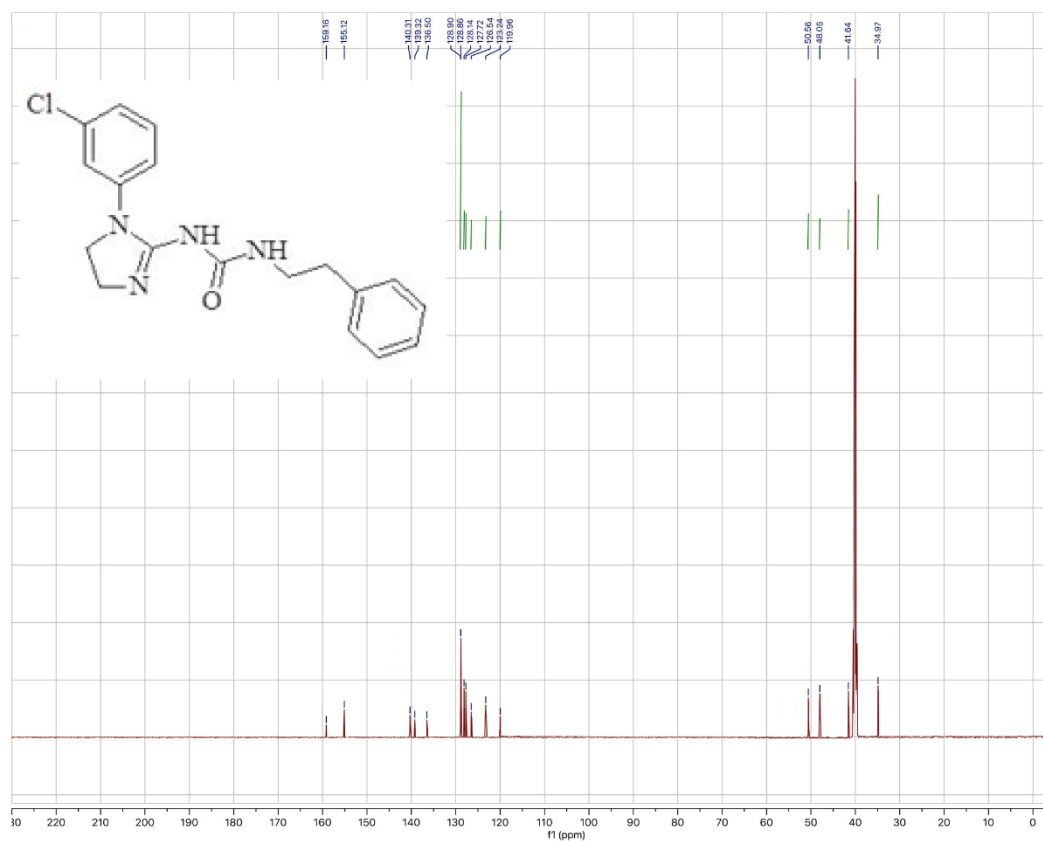

MS spectrum: C<sub>18</sub>H<sub>19</sub>ClN<sub>4</sub>O (m.m. calc. 343.1320). HRMS (ESI) *m/z* [M+H]<sup>+</sup>: 343.1297.

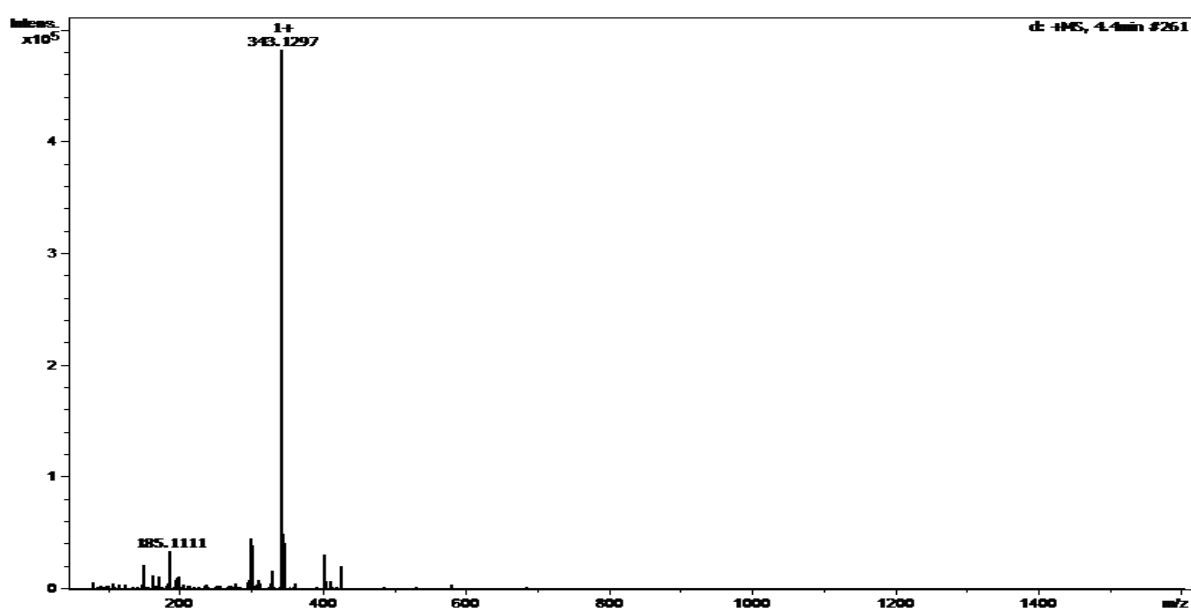

<sup>1</sup>H NMR spectrum

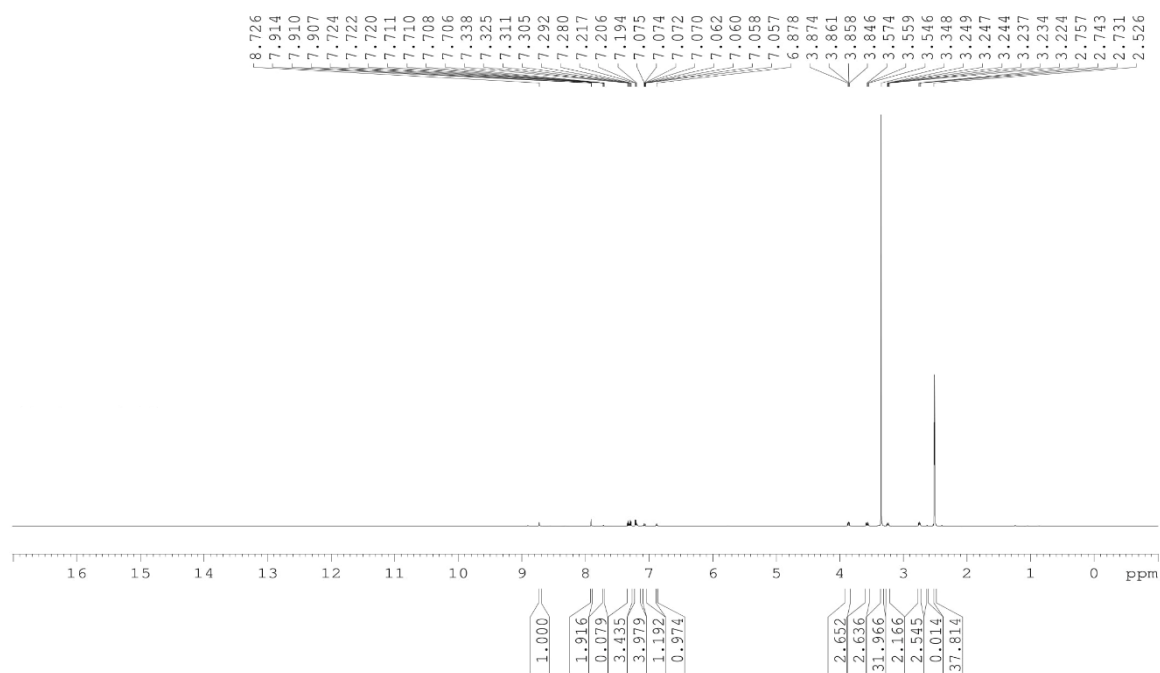

# Compound 5g

## <sup>13</sup>C NMR spectrum

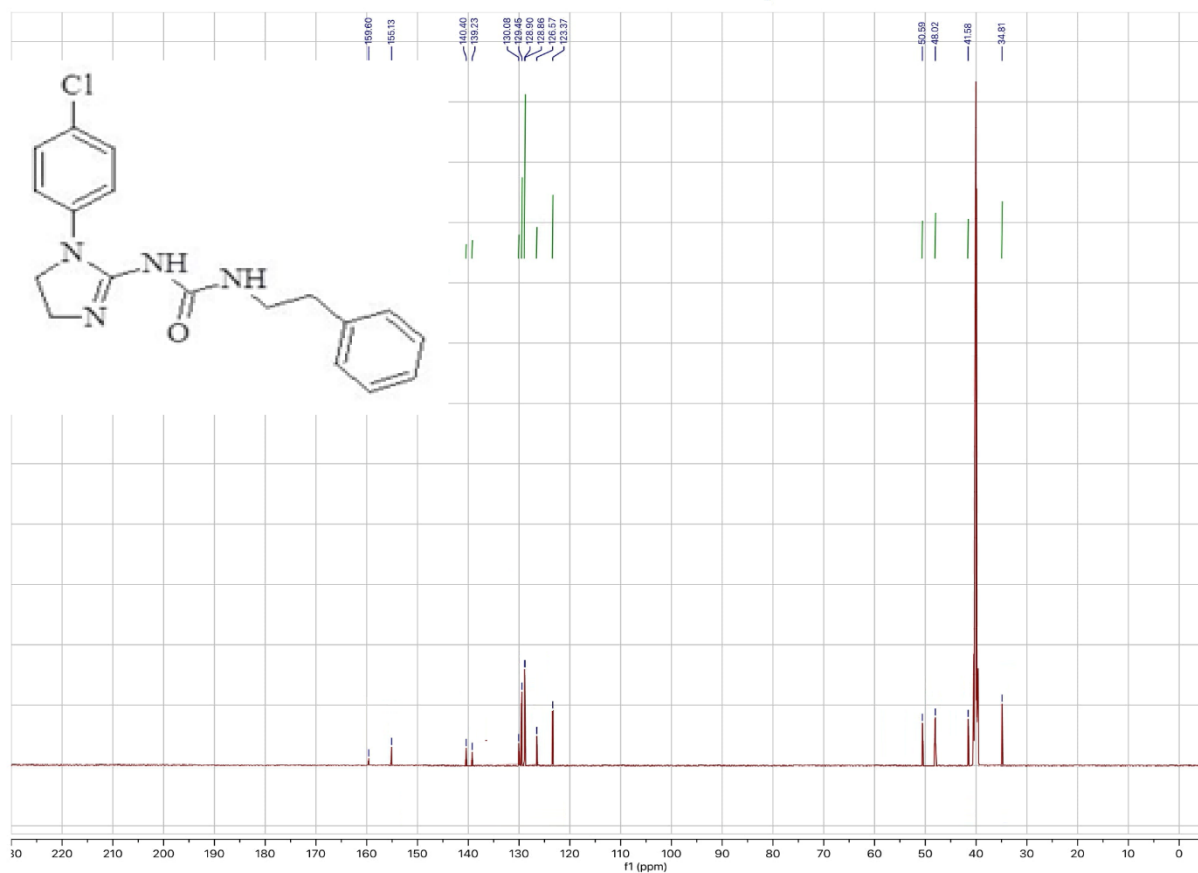

MS spectrum: C<sub>18</sub>H<sub>19</sub>ClN<sub>4</sub>O (m.m. calc. 343.1320). HRMS (ESI) *m/z* [M+H]<sup>+</sup>: 343.1316.

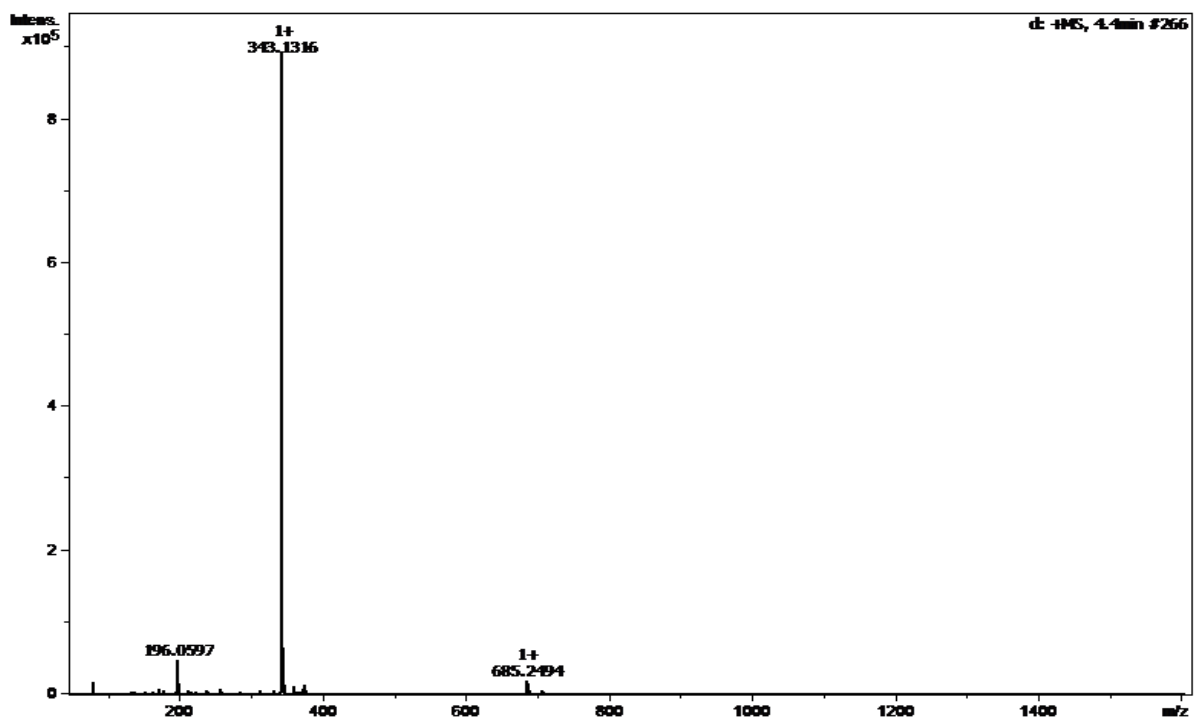

$^1\text{H}$  NMR spectrum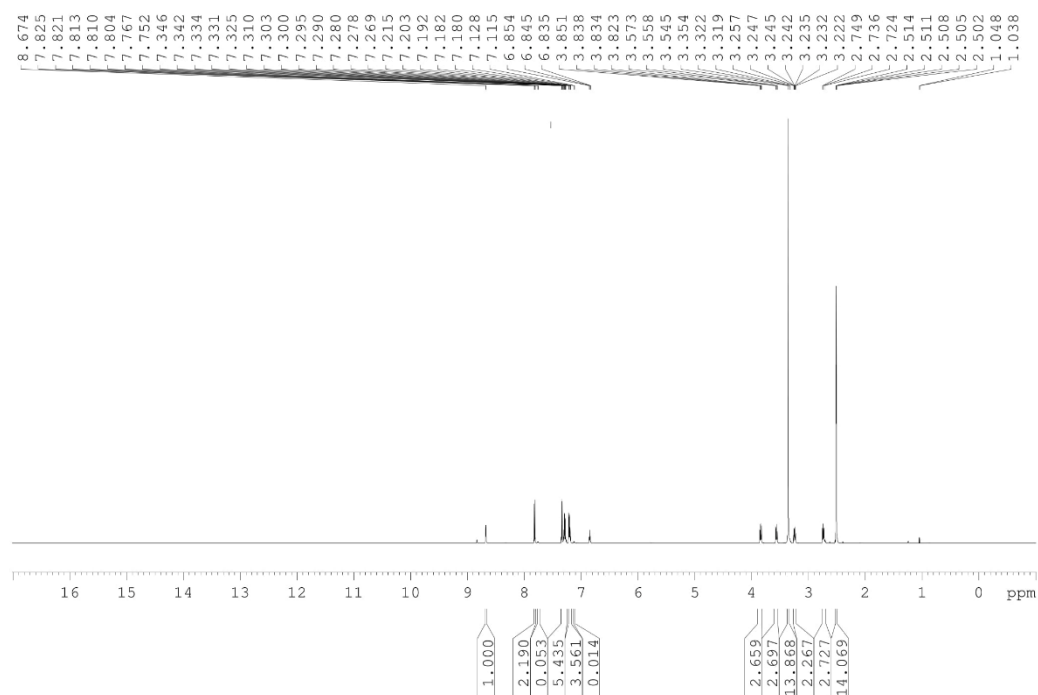

### Compound 6a

**$^{13}\text{C}$  NMR spectrum**

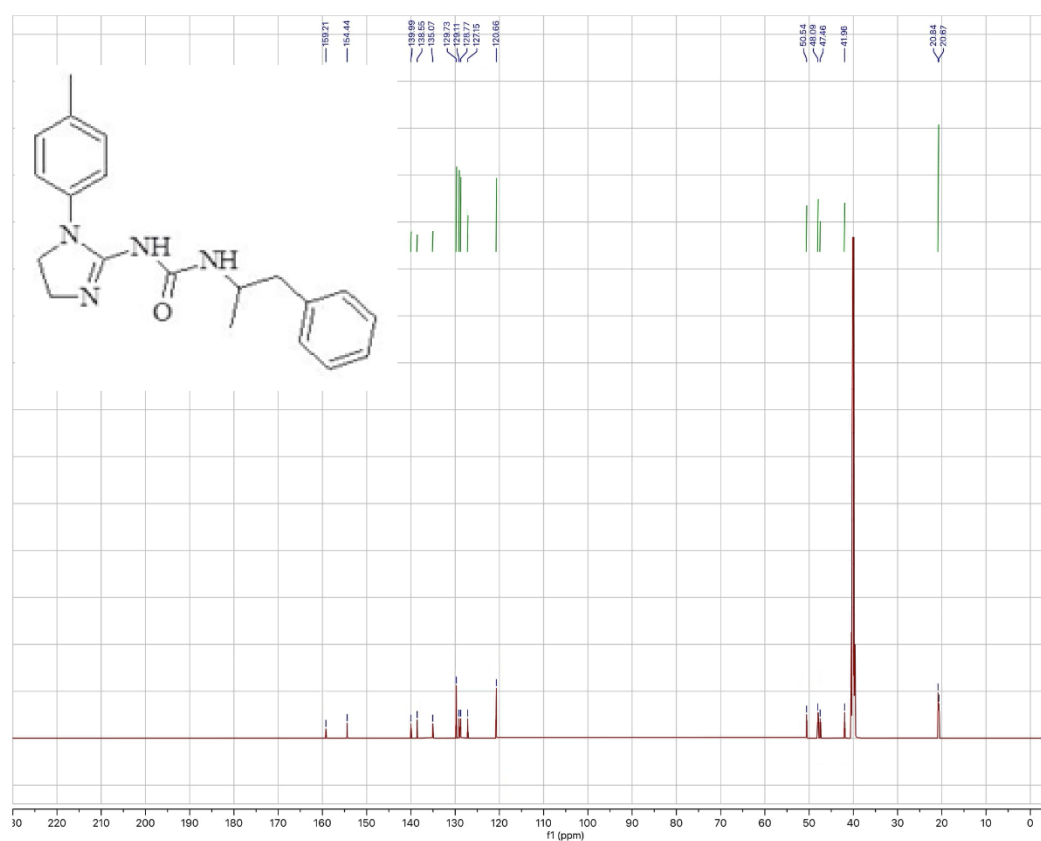

**MS spectrum:** C<sub>20</sub>H<sub>24</sub>N<sub>4</sub>O (m.m. calc. 337.2023). HRMS (ESI) *m/z* [M+H]<sup>+</sup>: 337.1959.

Spectrum View

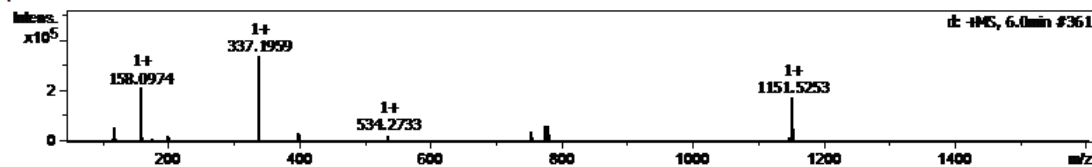

<sup>1</sup>H NMR spectrum

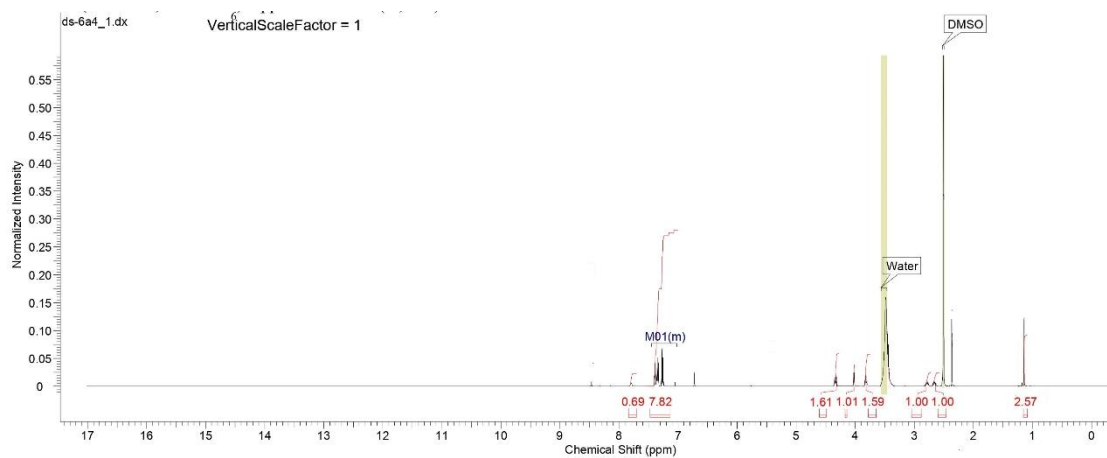

Compound 6b

<sup>13</sup>C NMR spectrum

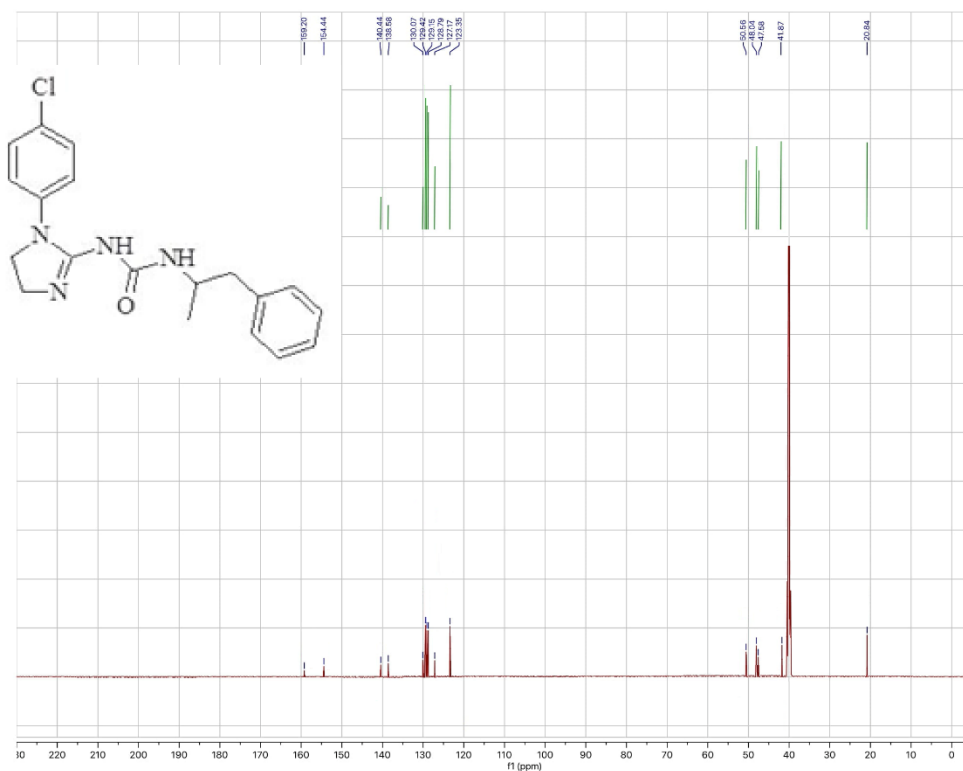

MS spectrum:  $C_{19}H_{21}ClN_4O$  (m.m. calc. 357.1477). HRMS (ESI)  $m/z$   $[M+H]^+$ : 357.1048.

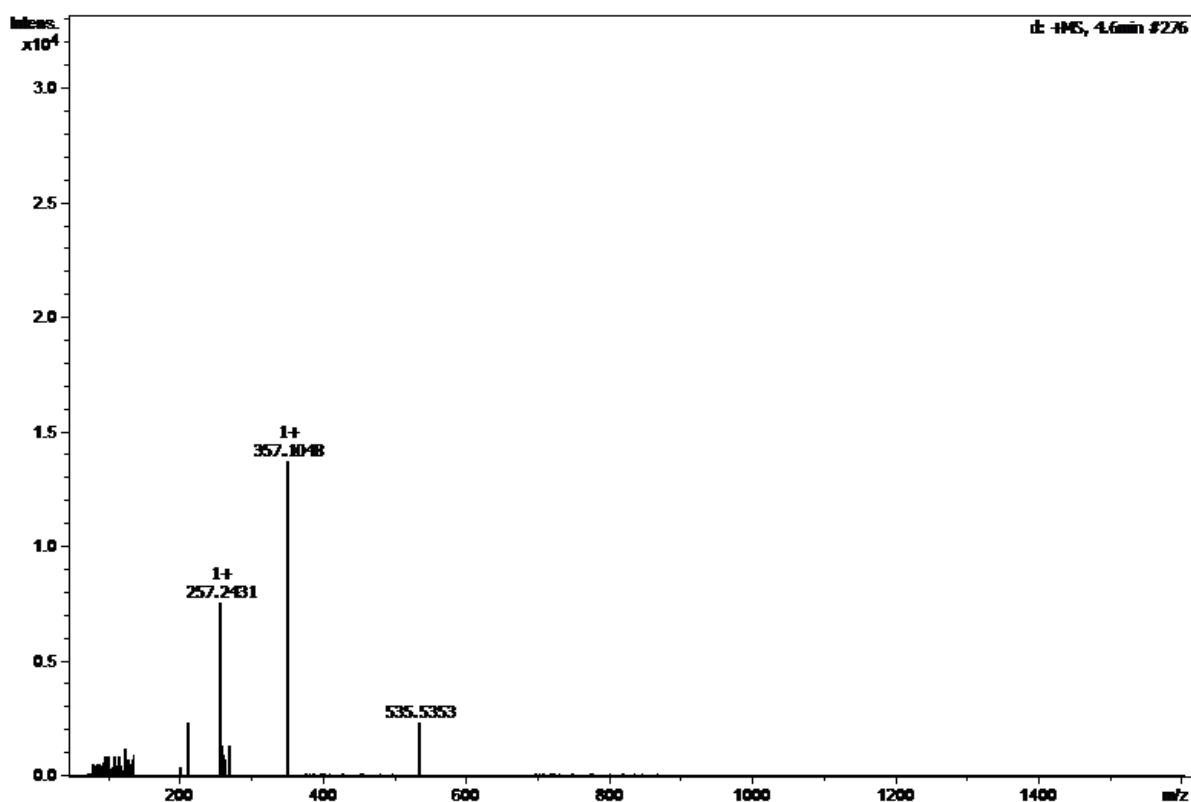

$^1H$  NMR spectrum

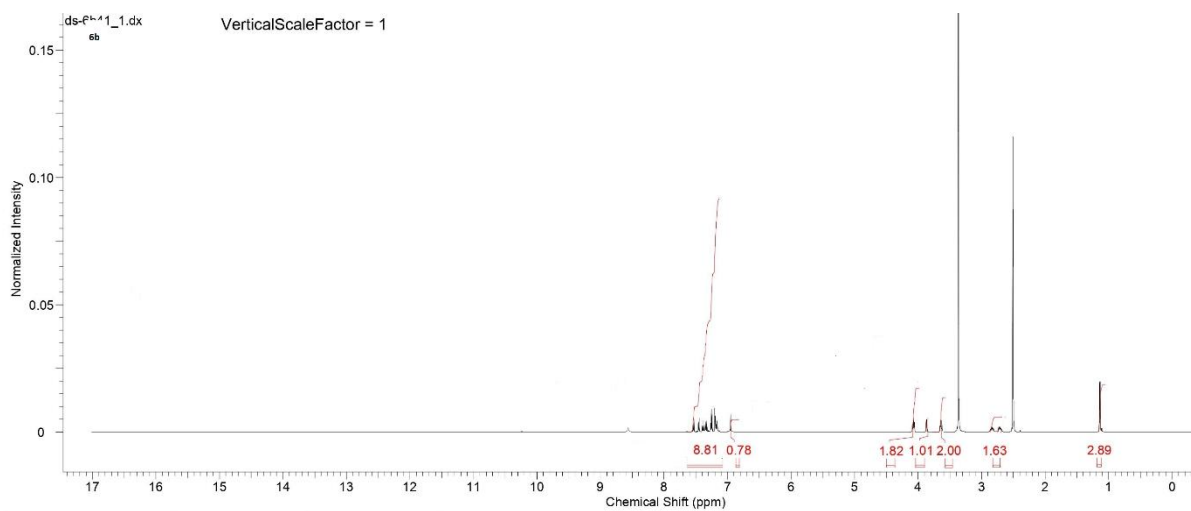

# Compound 6c

## <sup>13</sup>C NMR spectrum

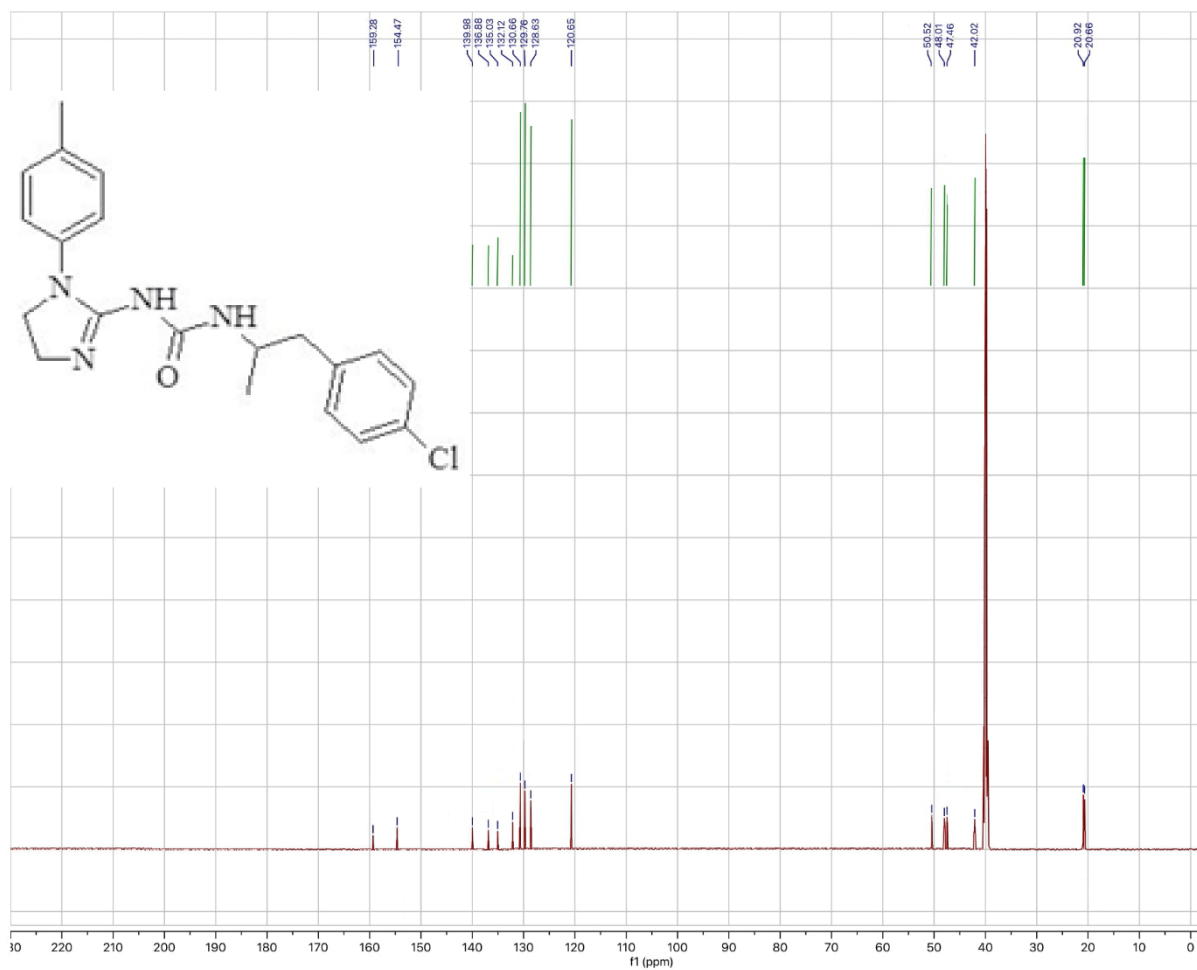

MS spectrum: C<sub>20</sub>H<sub>23</sub>ClN<sub>4</sub>O (m.m. calc. 371.1633). HRMS (ESI) *m/z* [M+H]<sup>+</sup>: 371.1621.

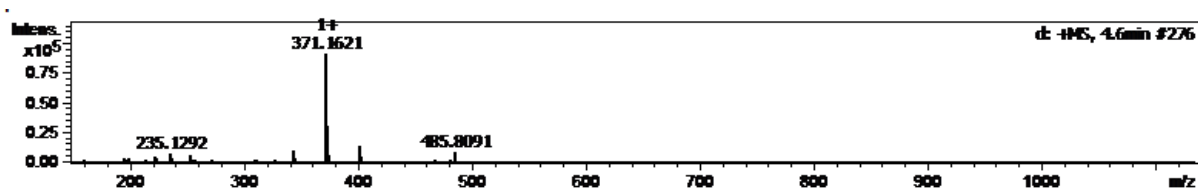

## <sup>1</sup>H NMR spectrum

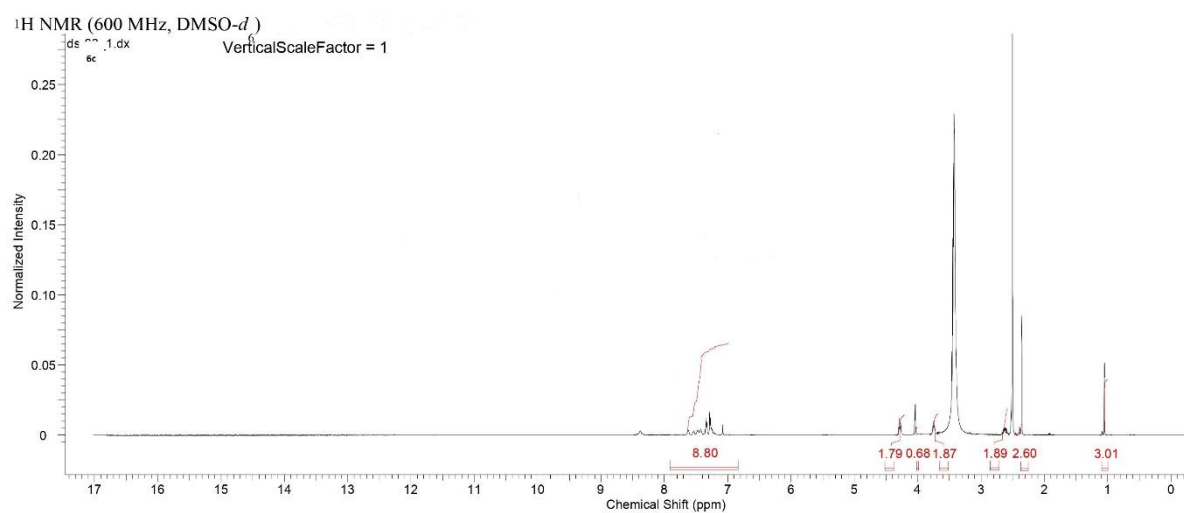

## Compound 6d

## <sup>13</sup>C NMR spectrum

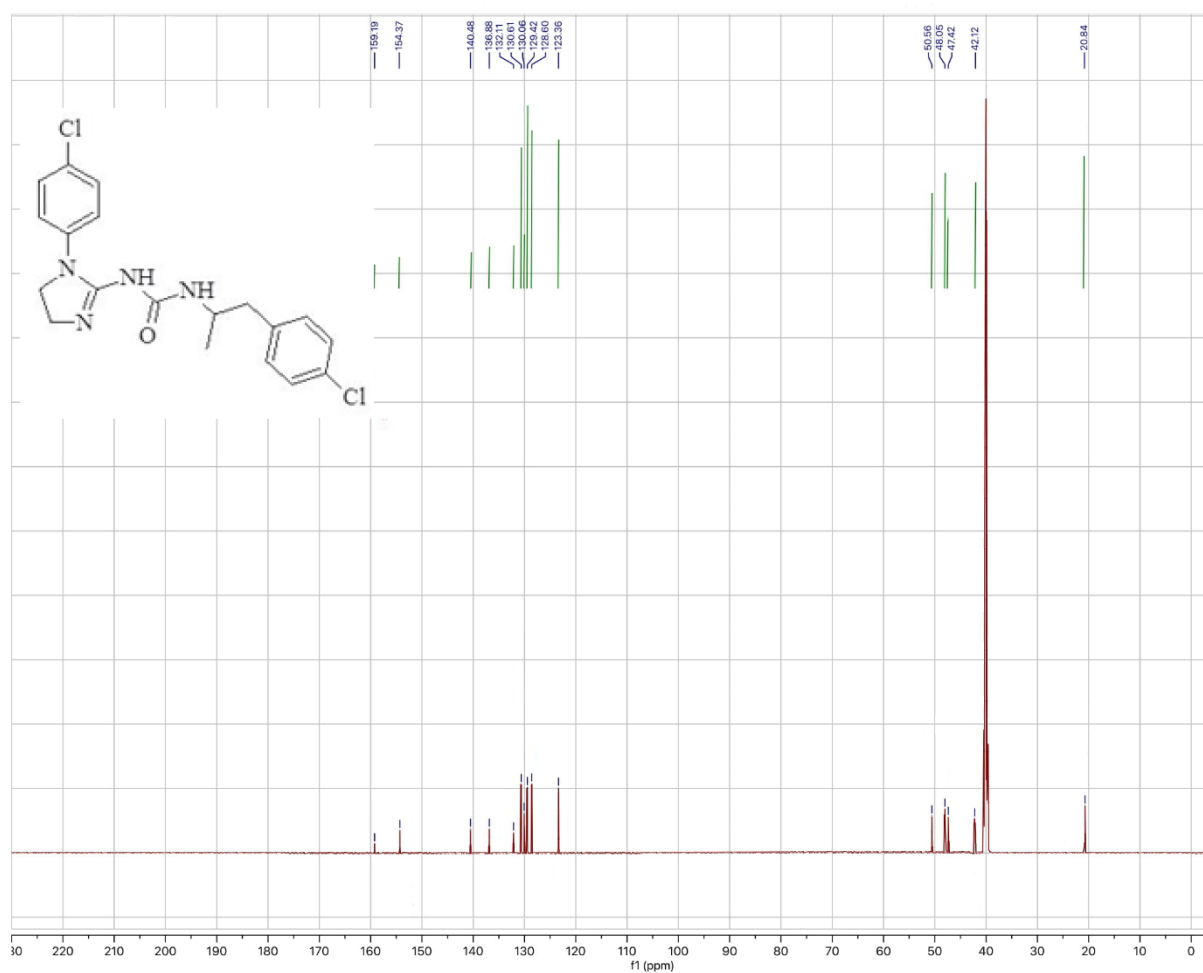

**MS spectrum:**  $C_{19}H_{20}Cl_2N_4O$  (m.m. calc. 391.1087). HRMS (ESI)  $m/z$   $[M+H]^+$ : 391.1052.

**Spectrum View**

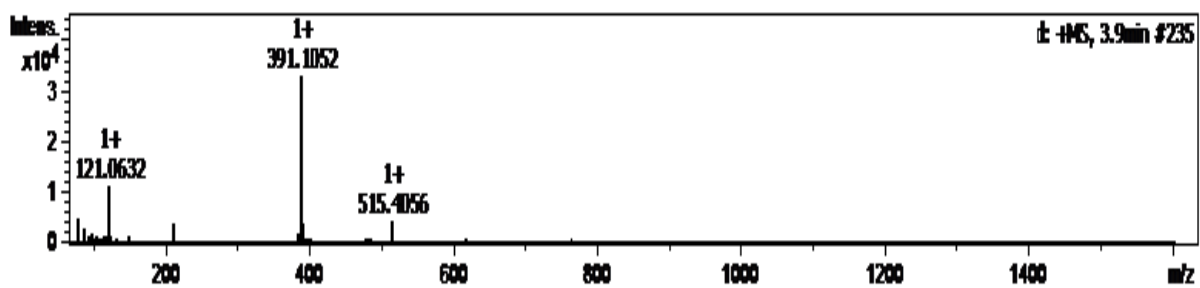

**$^1H$  NMR spectrum**

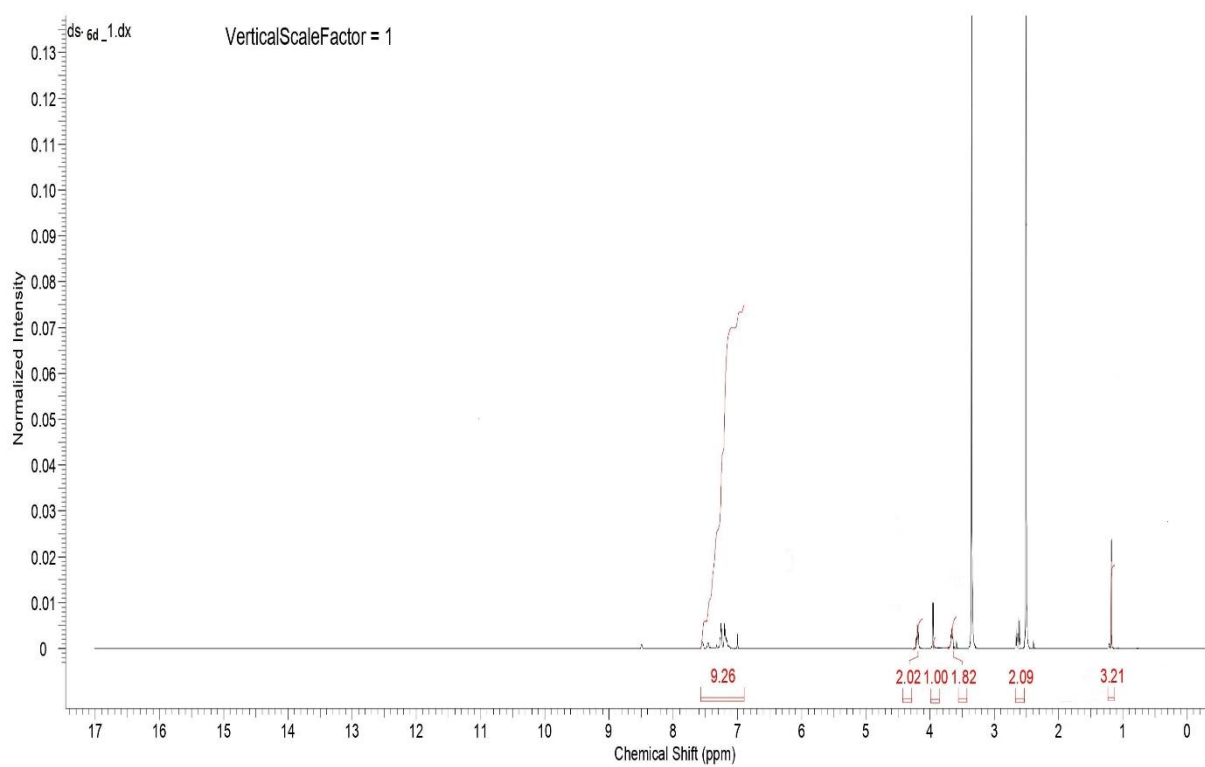

# Compound 6e

## <sup>13</sup>C NMR spectrum

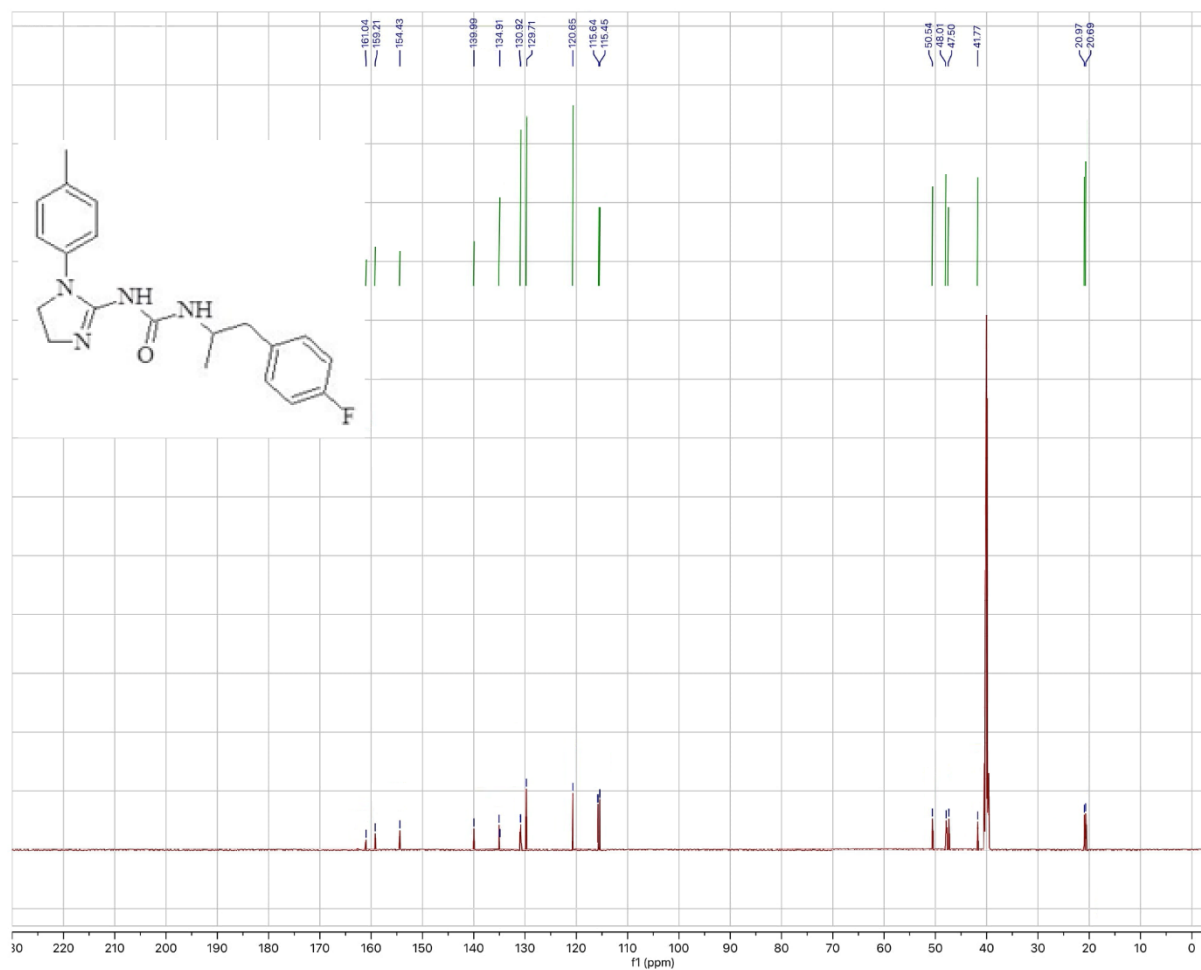

**MS spectrum:** C<sub>20</sub>H<sub>23</sub>FN<sub>4</sub>O (m.m. calc. 355.1929). HRMS (ESI) *m/z* [M+H]<sup>+</sup>: 355.1891.

## Spectrum View

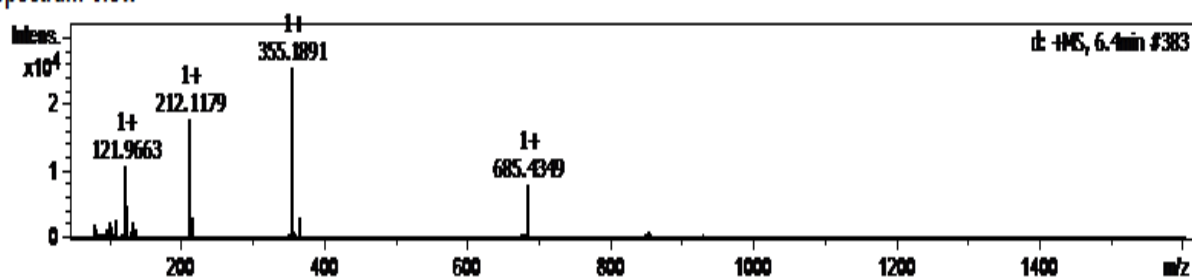

# <sup>1</sup>H NMR spectrum

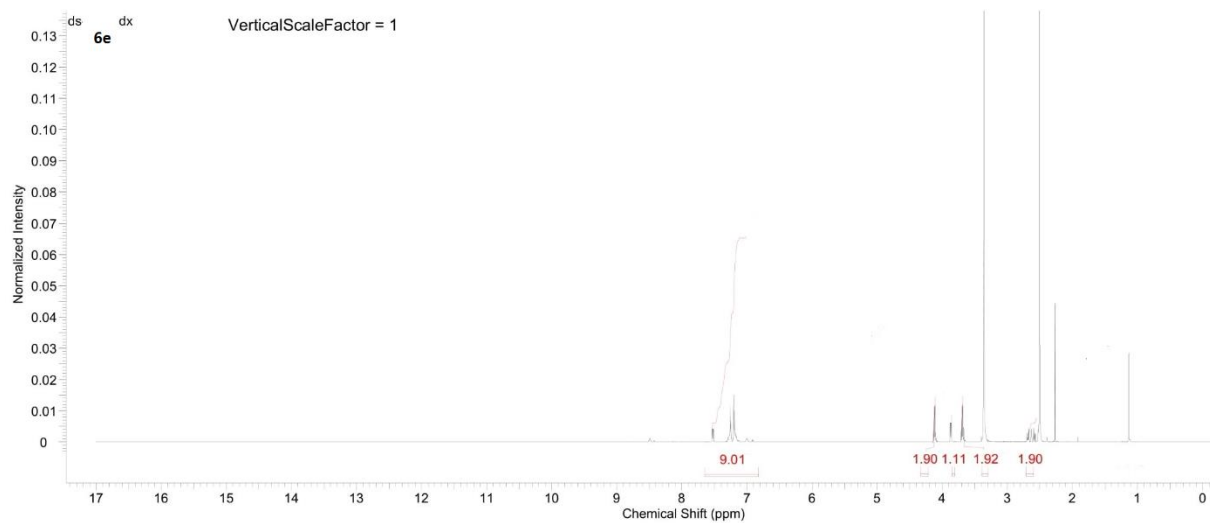

## Compound 6f

# <sup>13</sup>C NMR spectrum

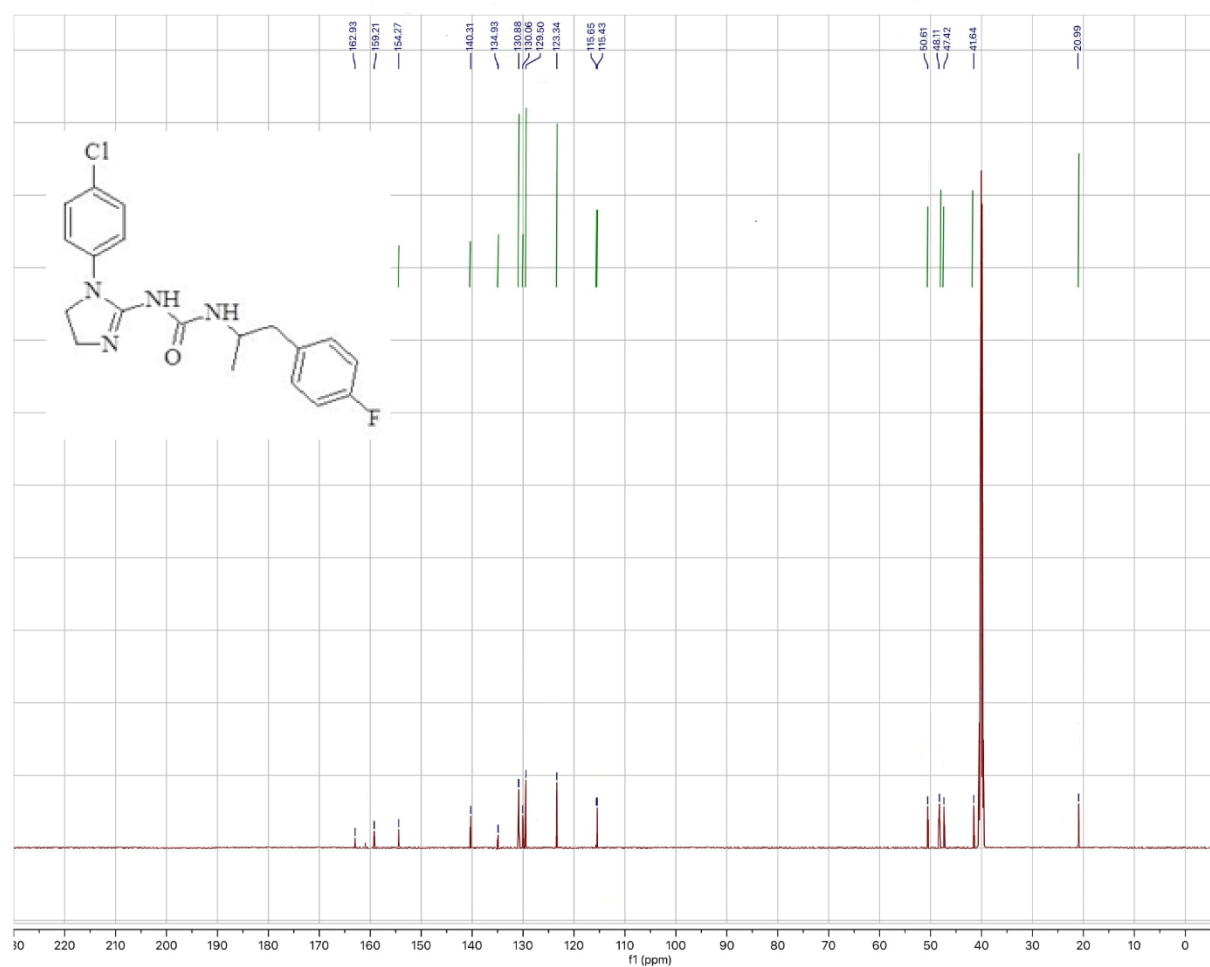

**MS spectrum:** C<sub>19</sub>H<sub>20</sub>ClFN<sub>4</sub>O (m.m. calc. 375.1382). HRMS (ESI) *m/z* [M+H]<sup>+</sup>: 375.1360.

Spectrum View

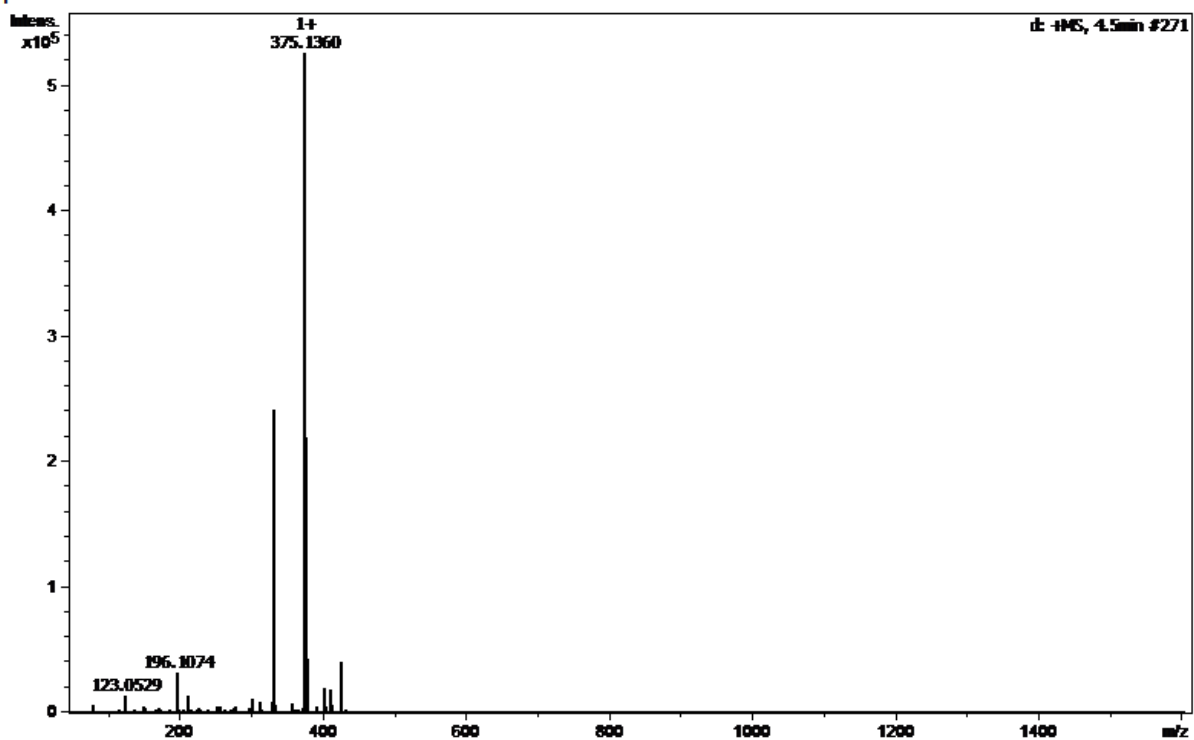

<sup>1</sup>H NMR spectrum

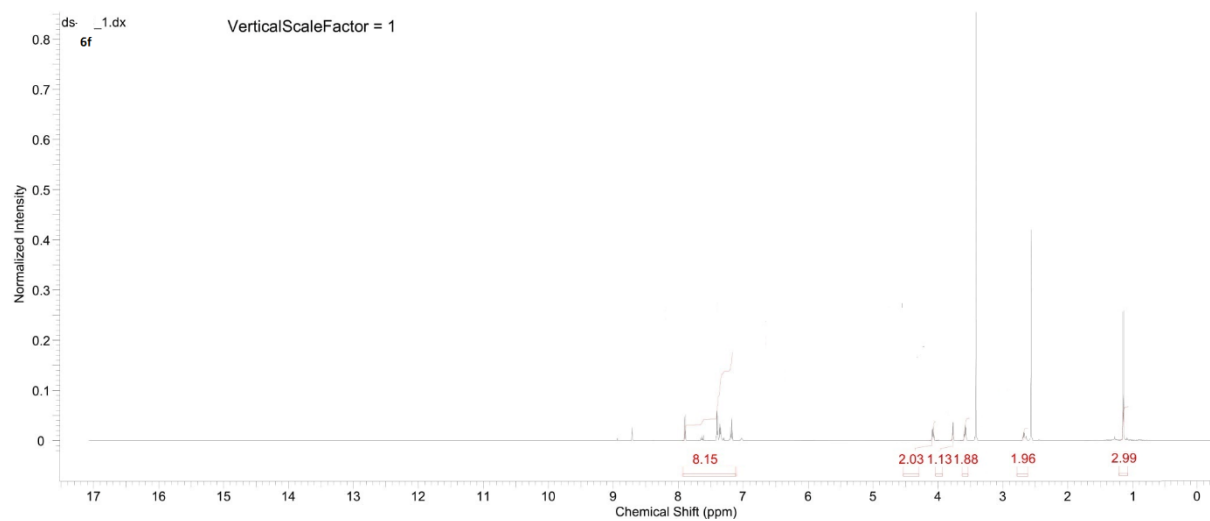

# Compound 6g

## <sup>13</sup>C NMR spectrum

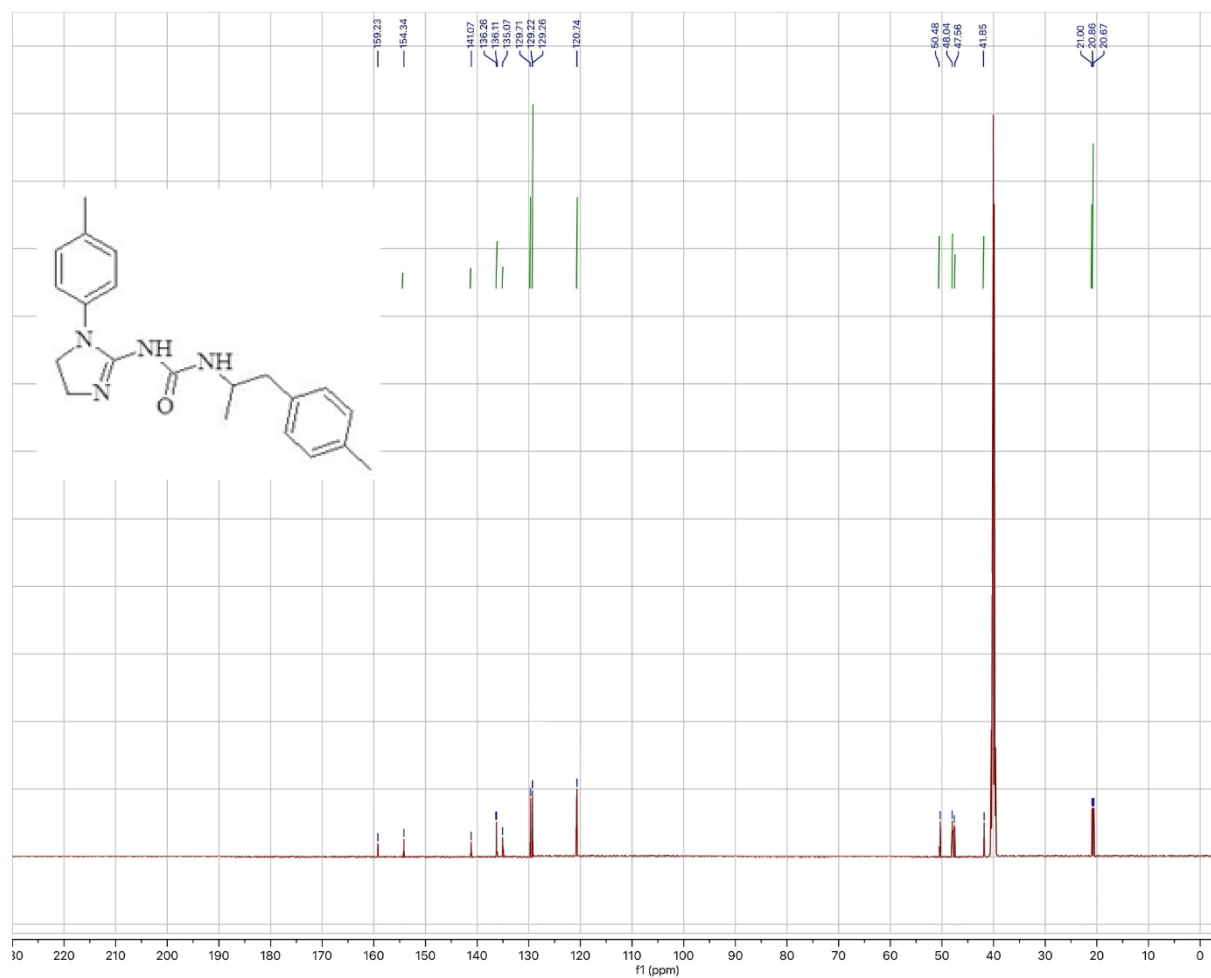

**MS spectrum:** C<sub>21</sub>H<sub>26</sub>N<sub>4</sub>O (m.m. calc. 351.2179). HRMS (ESI) *m/z* [M+H]<sup>+</sup>: 351.2234.

## Spectrum View

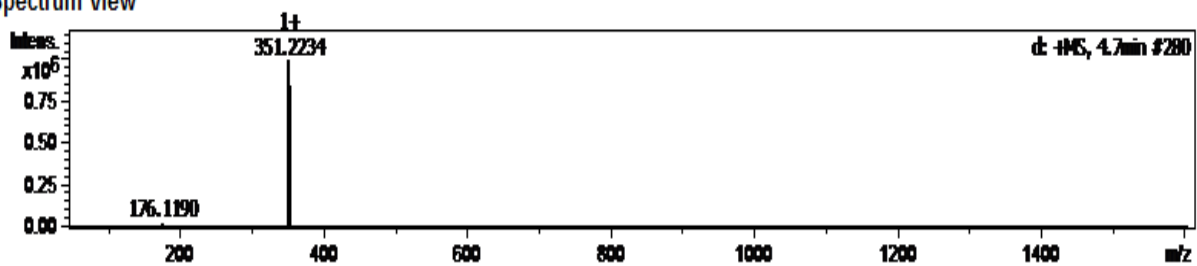

## $^1\text{H}$ NMR spectrum

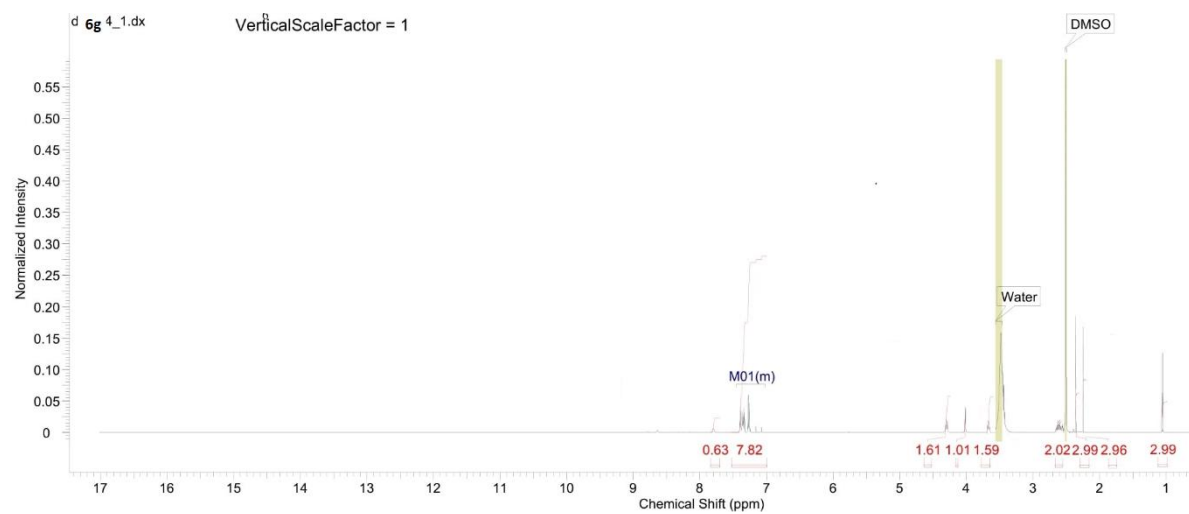

## Compound 6h

## $^{13}\text{C}$ NMR spectrum

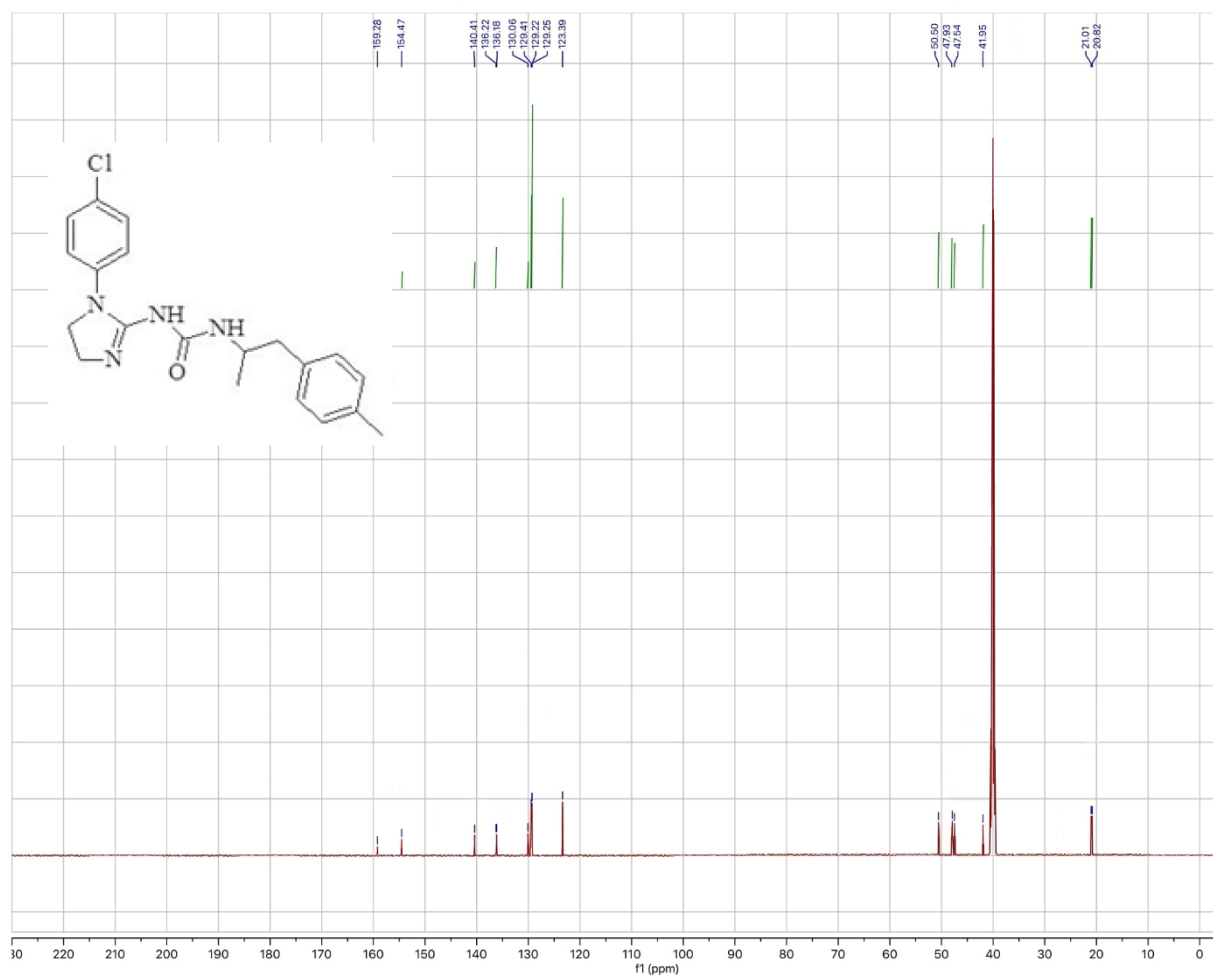

**MS spectrum:** C<sub>20</sub>H<sub>23</sub>ClN<sub>4</sub>O (m.m. calc. 371.1633). HRMS (ESI) *m/z* [M+H]<sup>+</sup>: 371.2033.

Spectrum View

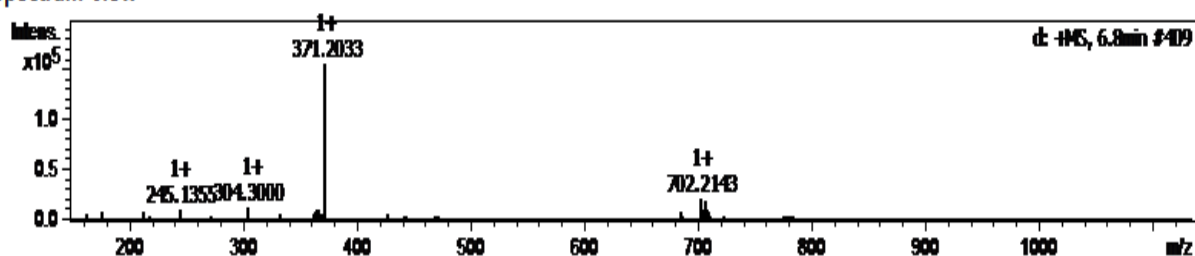

<sup>1</sup>H NMR spectrum

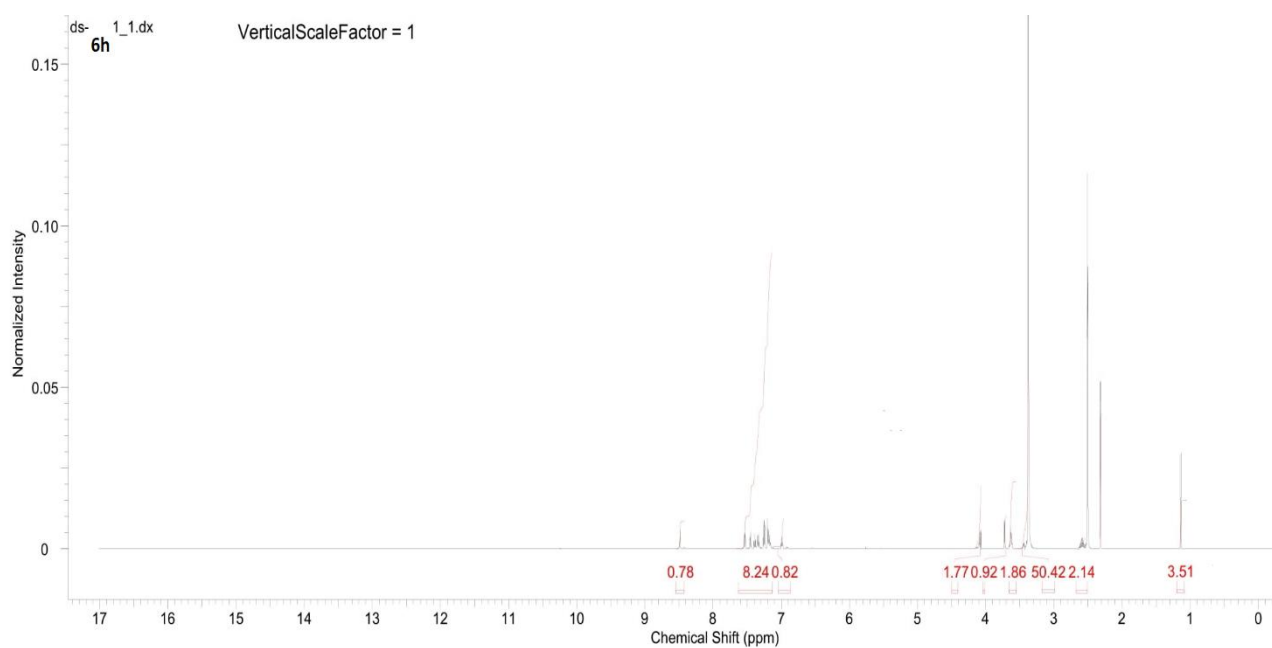

# Compound 6i

## <sup>13</sup>C NMR spectrum

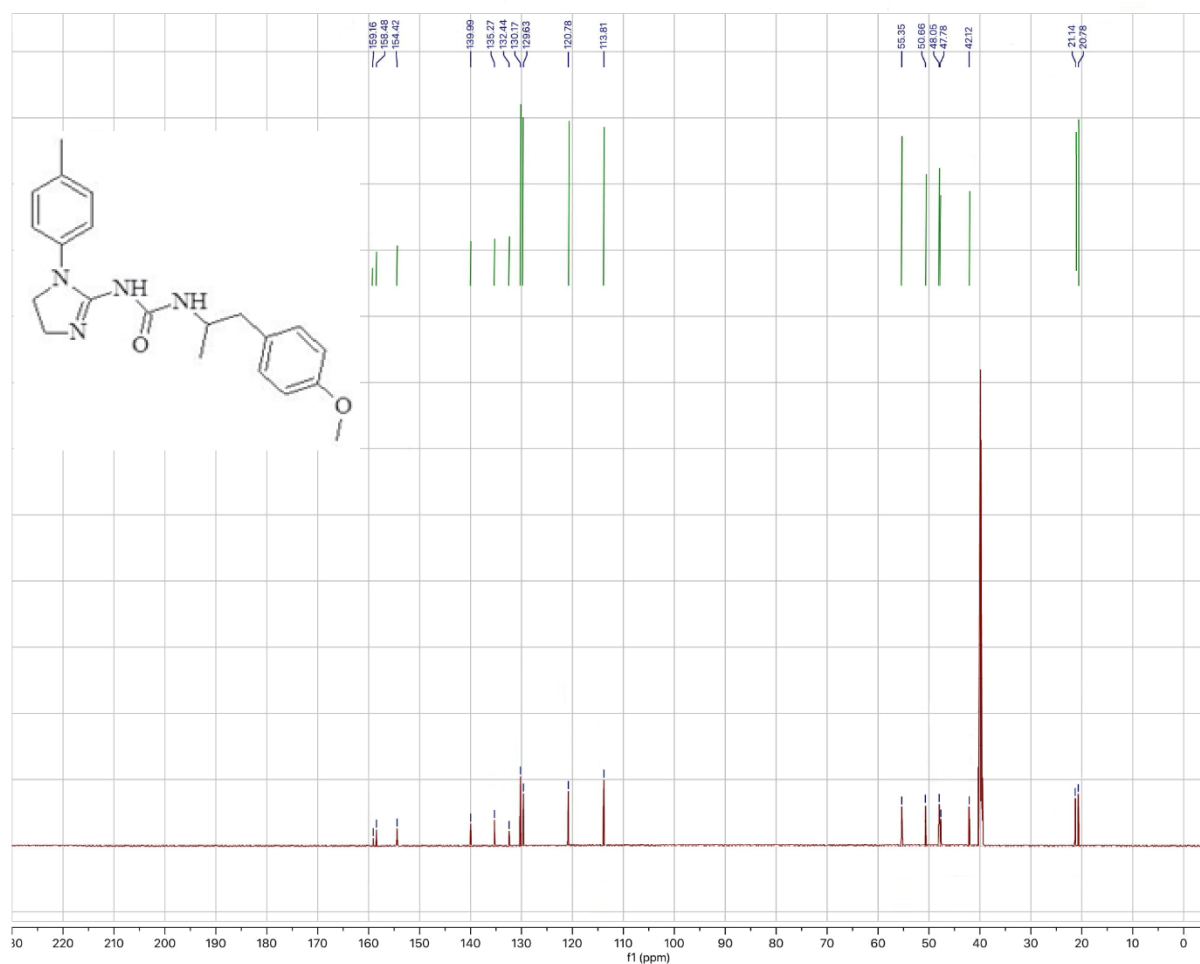

**MS spectrum:** C<sub>21</sub>H<sub>26</sub>N<sub>4</sub>O<sub>2</sub> (m.m. calc. 367.2128). HRMS (ESI) *m/z* [M+H]<sup>+</sup>: 367.2132.

## Spectrum View

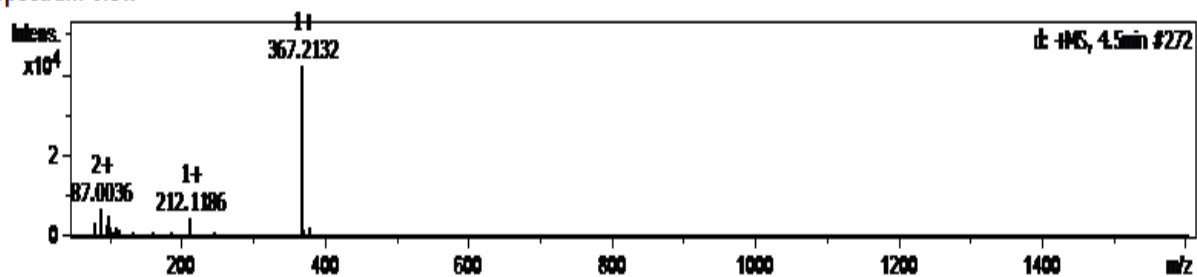

# <sup>1</sup>H NMR spectrum

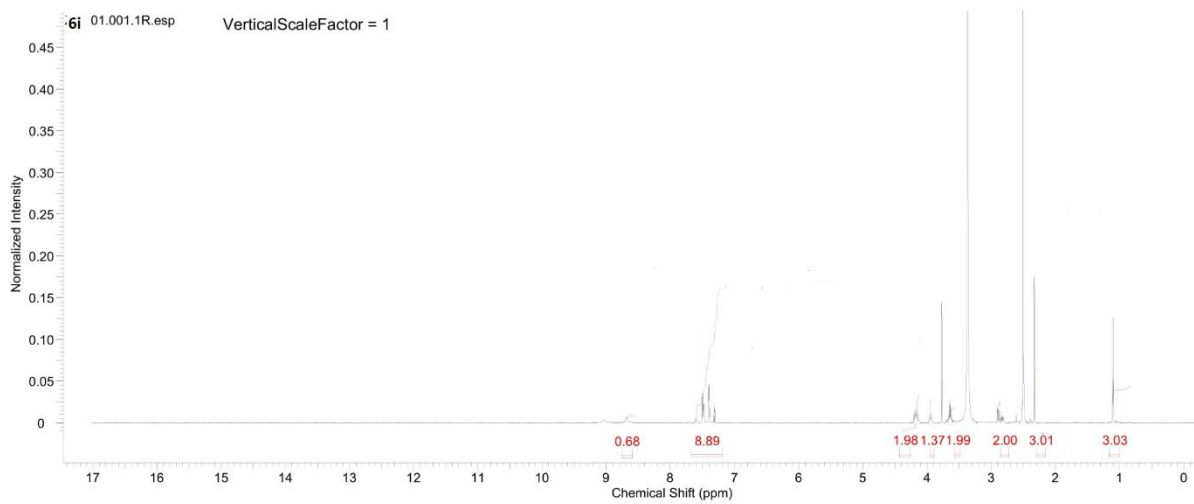

## Compound 6j

# <sup>13</sup>C NMR spectrum

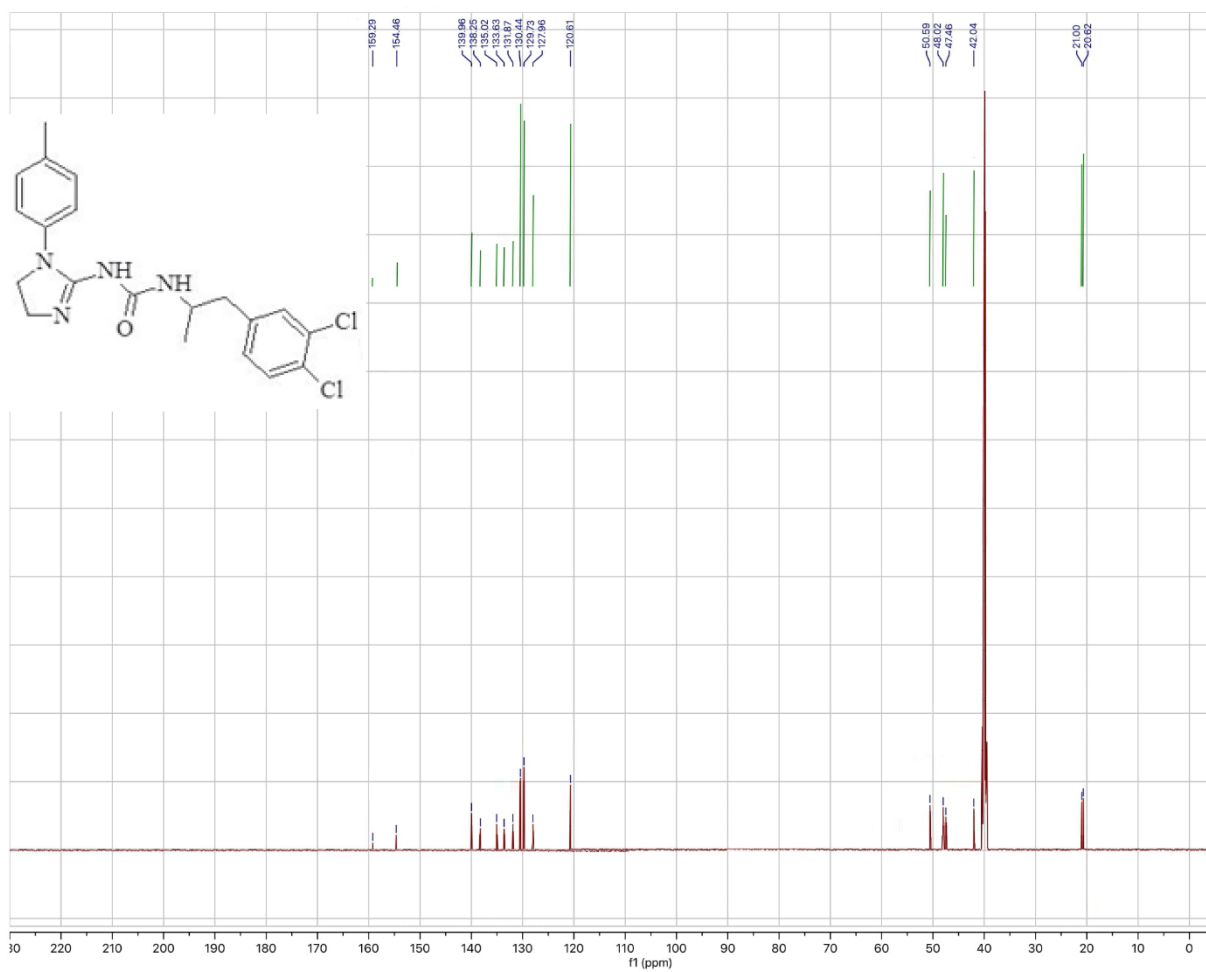

**MS spectrum:** C<sub>20</sub>H<sub>22</sub>Cl<sub>2</sub>N<sub>4</sub>O (m.m. calc. 405.1243). HRMS (ESI) *m/z* [M+H]<sup>+</sup>: 405.1271.

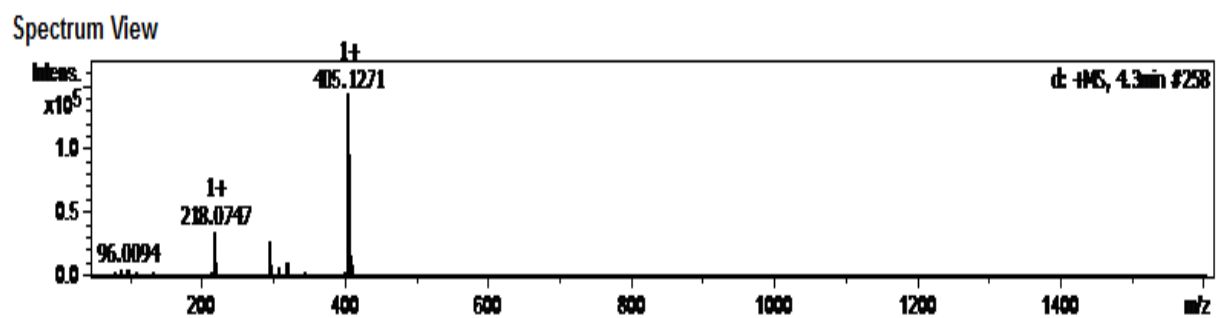

<sup>1</sup>H NMR spectrum

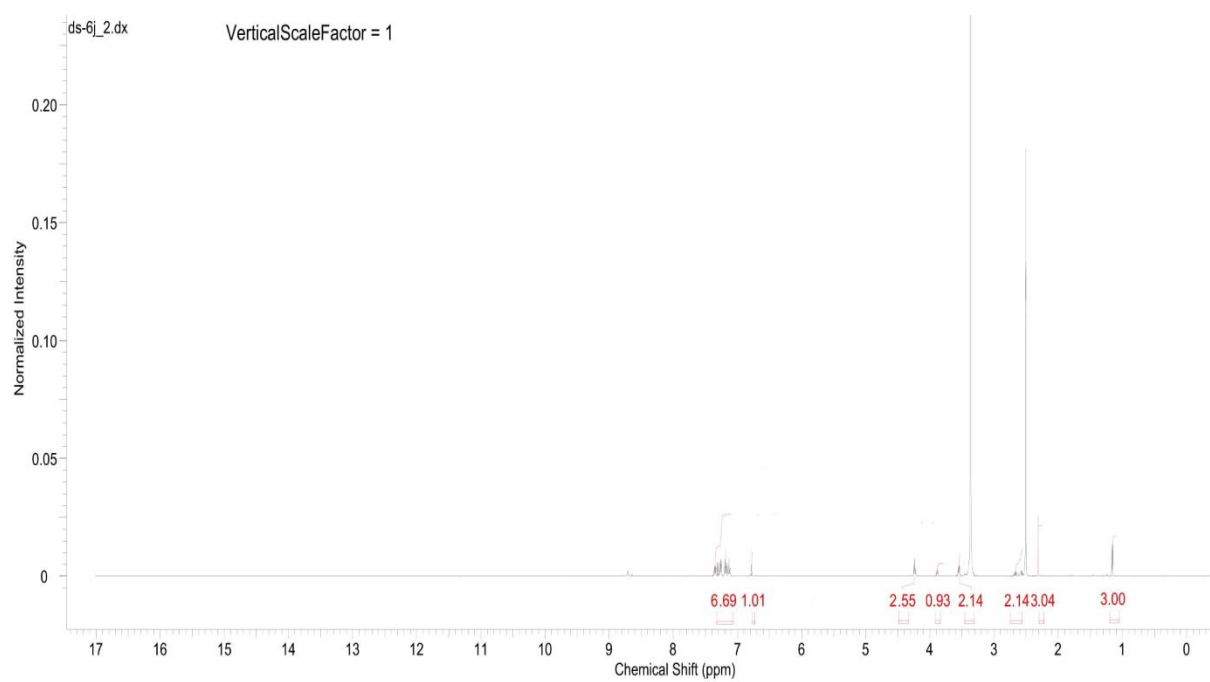

**Compound 6k**

**$^{13}\text{C}$  NMR spectrum**

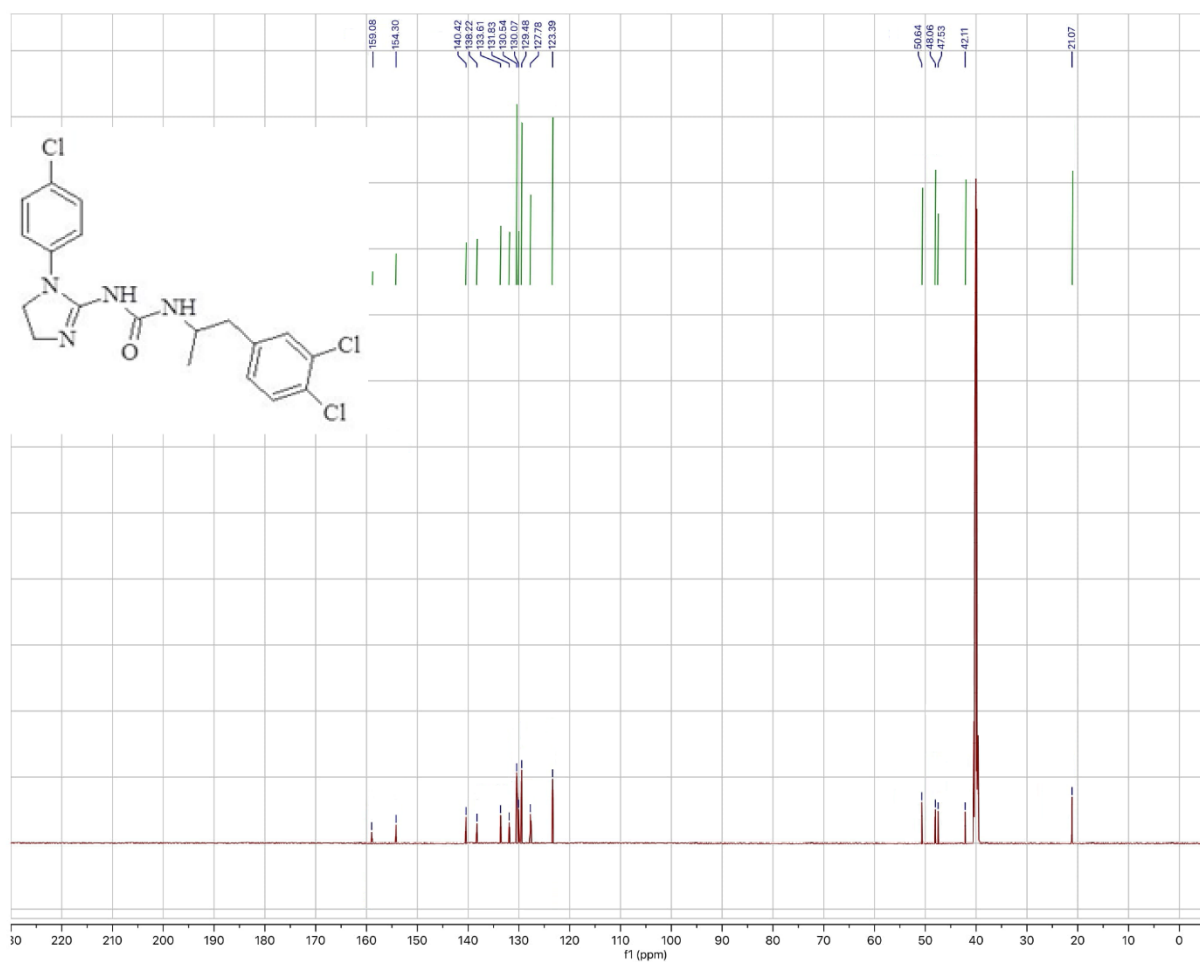

**MS spectrum:** C<sub>19</sub>H<sub>19</sub>Cl<sub>3</sub>N<sub>4</sub>O (m.m. calc. 425.0670). HRMS (ESI)  $m/z$  [M+H]<sup>+</sup>: 425.0679.

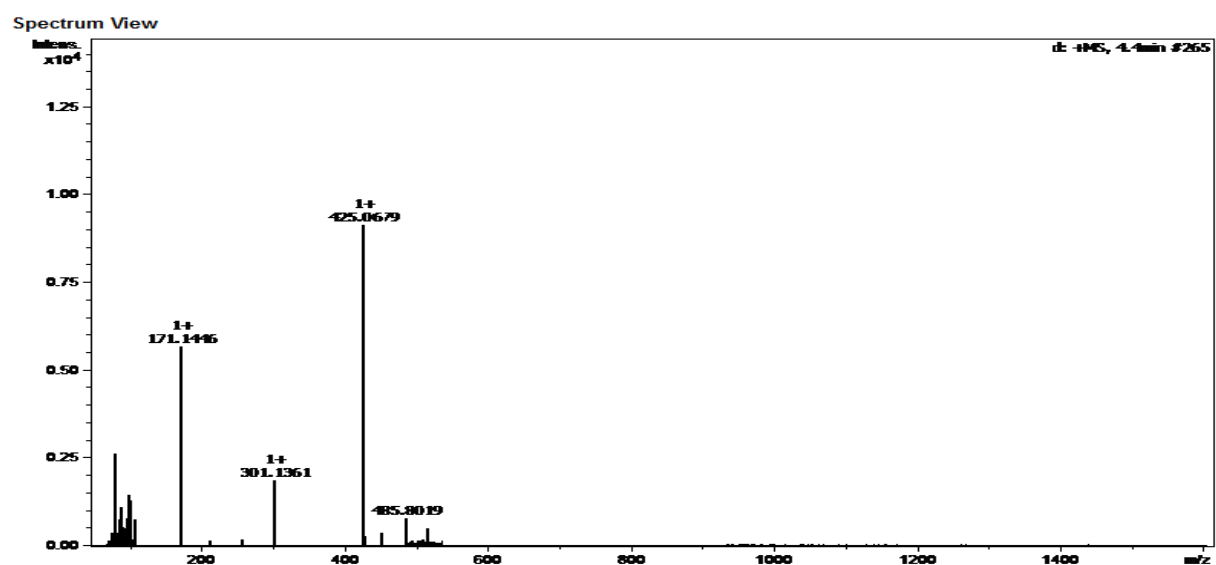

<sup>1</sup>H NMR spectrum

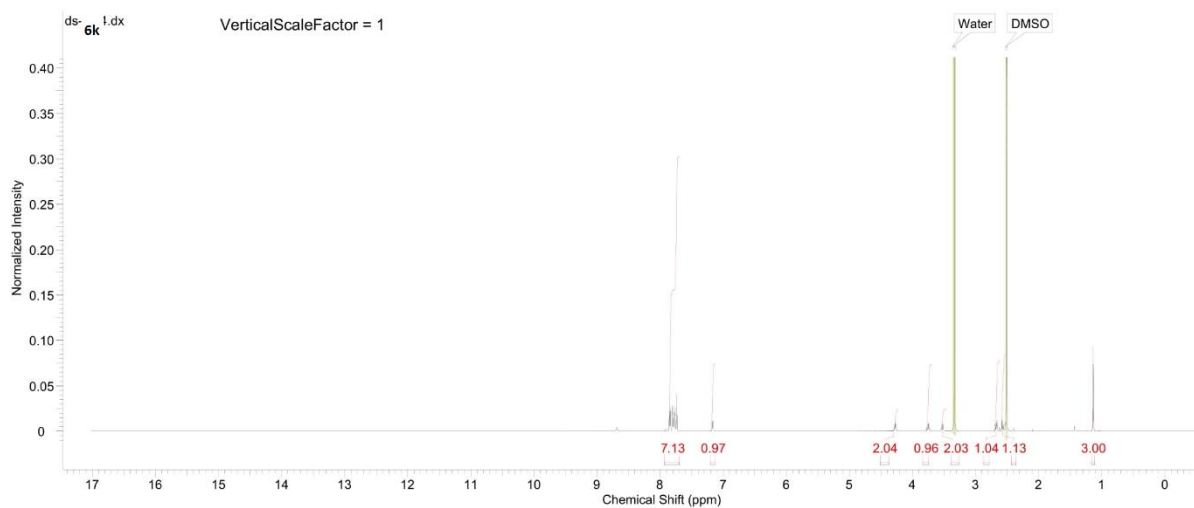

## Compound 6l

### <sup>13</sup>C NMR spectrum

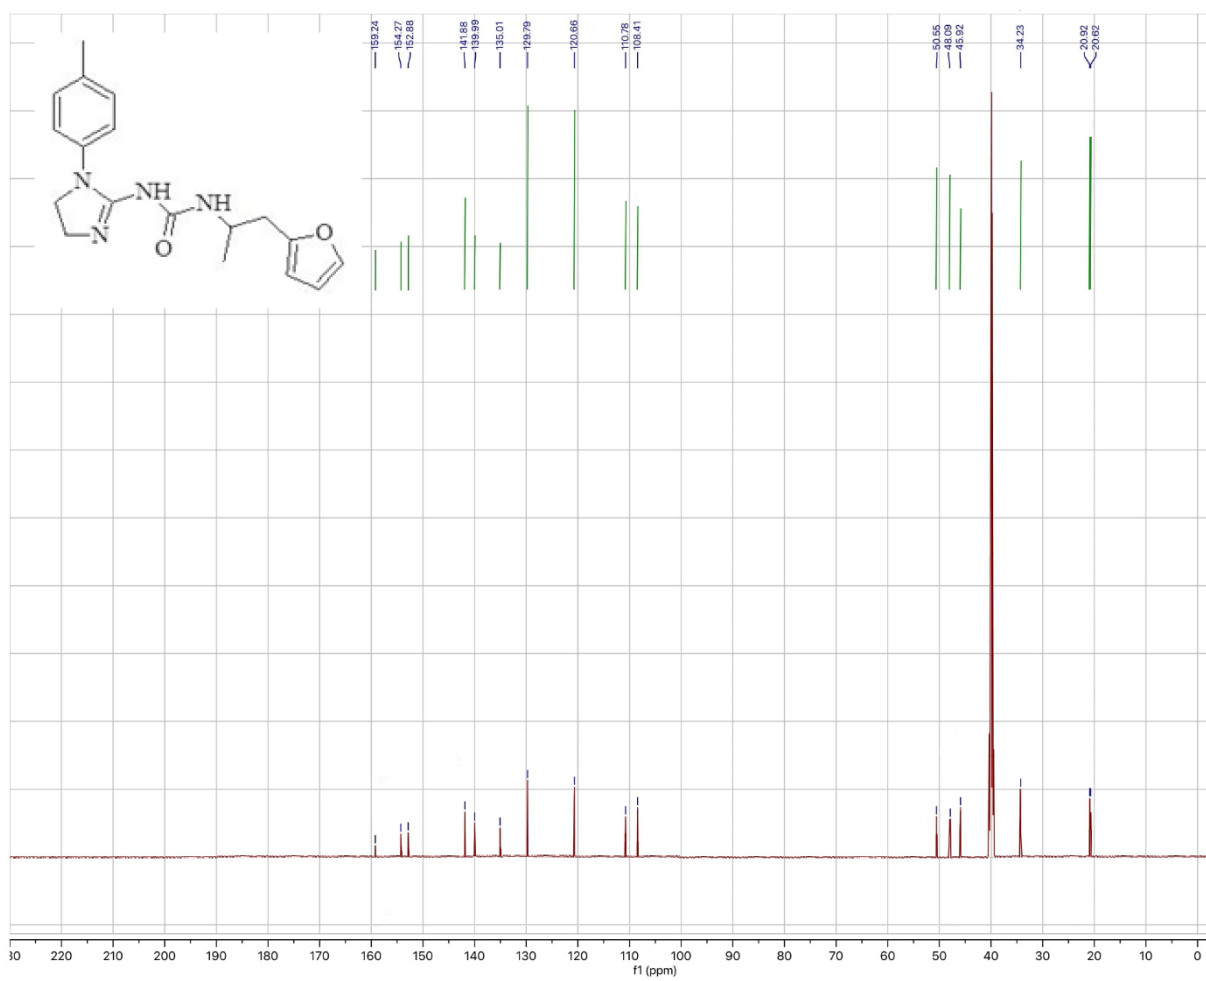

**MS spectrum:** C<sub>18</sub>H<sub>22</sub>N<sub>4</sub>O<sub>2</sub> (m.m. calc. 327.1816). HRMS (ESI) *m/z* [M+H]<sup>+</sup>: 327.2054.

# Spectrum View

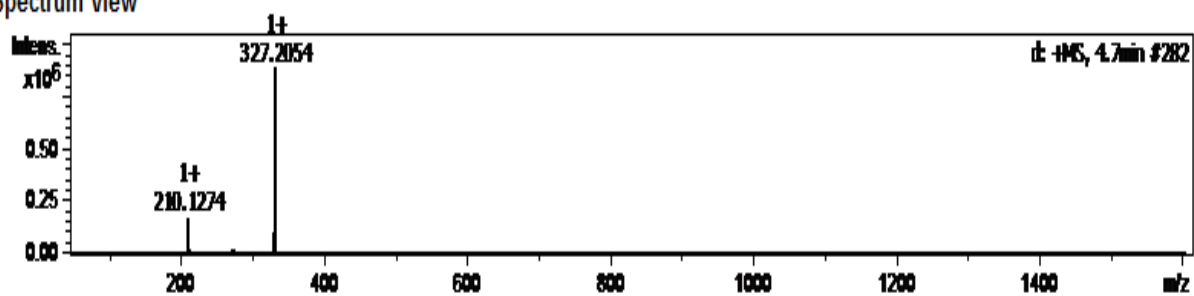

## <sup>1</sup>H NMR spectrum

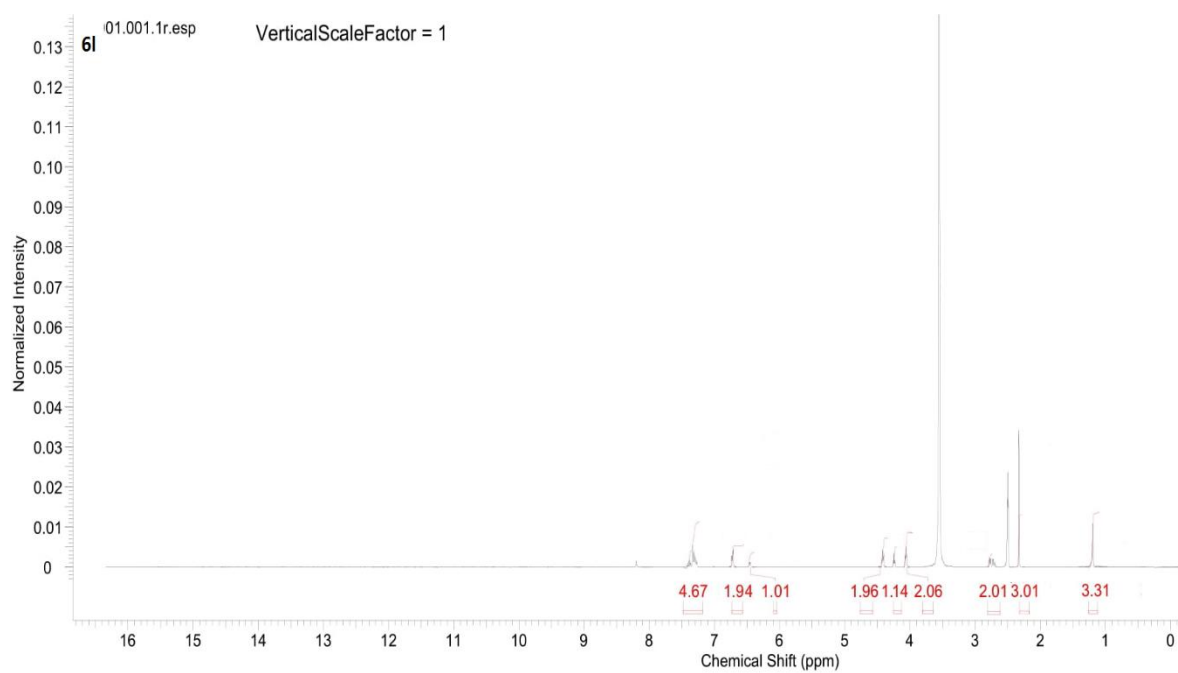

## Compound 6m

### <sup>13</sup>C NMR spectrum

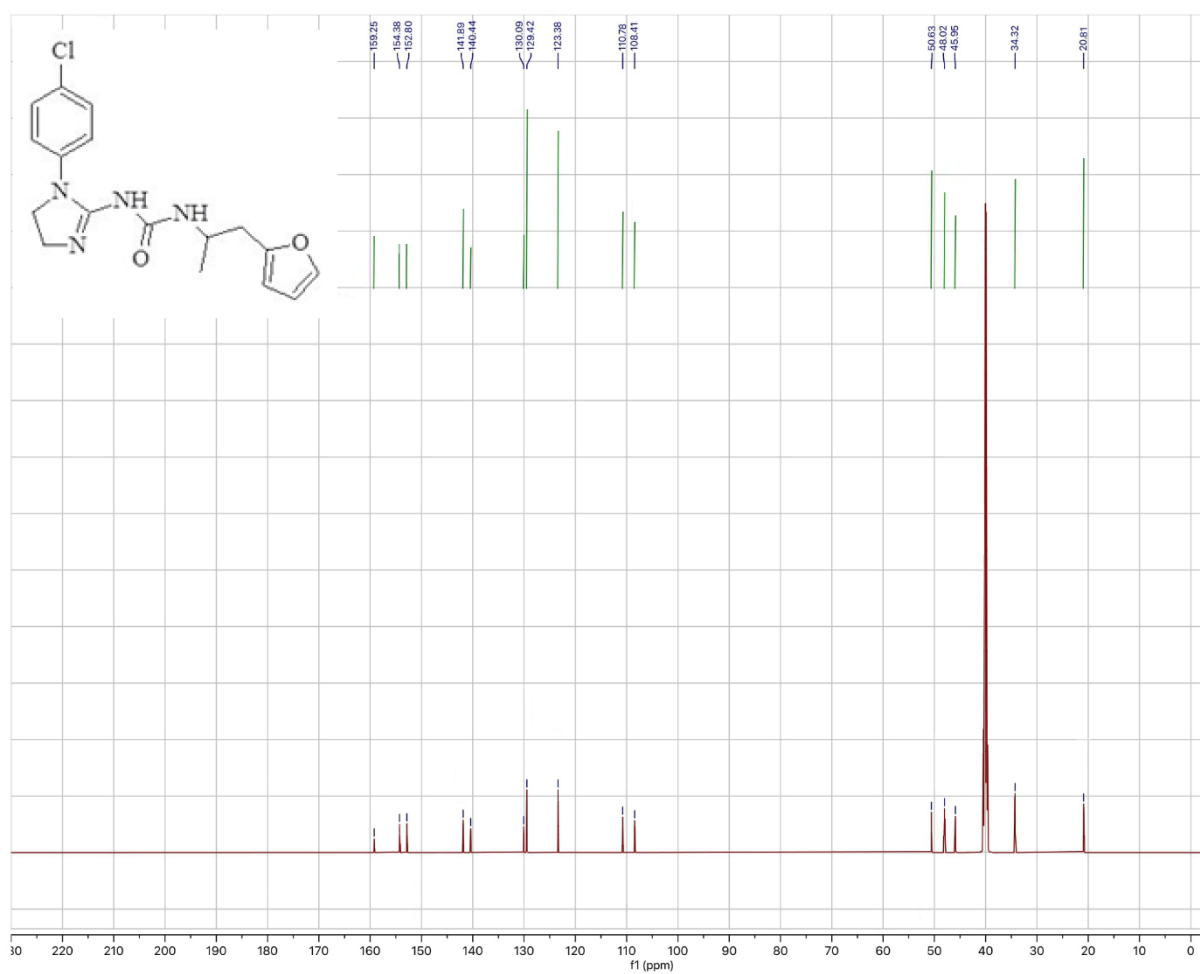

MS spectrum: C<sub>17</sub>H<sub>19</sub>ClN<sub>4</sub>O<sub>2</sub> (m.m. calc. 347.1269). HRMS (ESI) *m/z* [M+H]<sup>+</sup>: 347.1232.

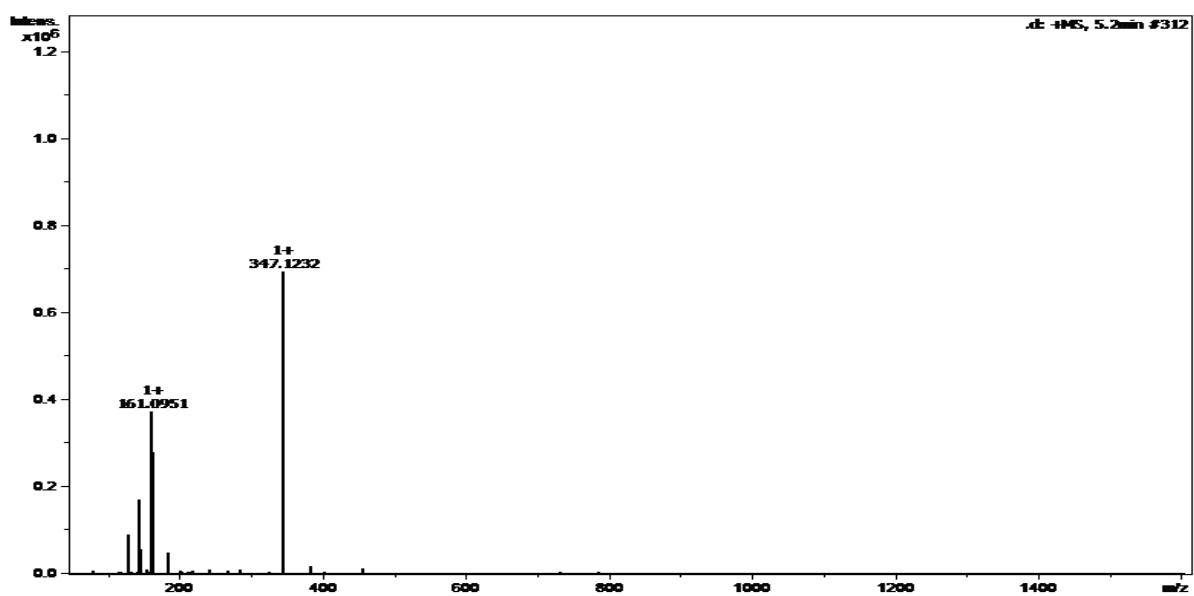

### <sup>1</sup>H NMR spectrum

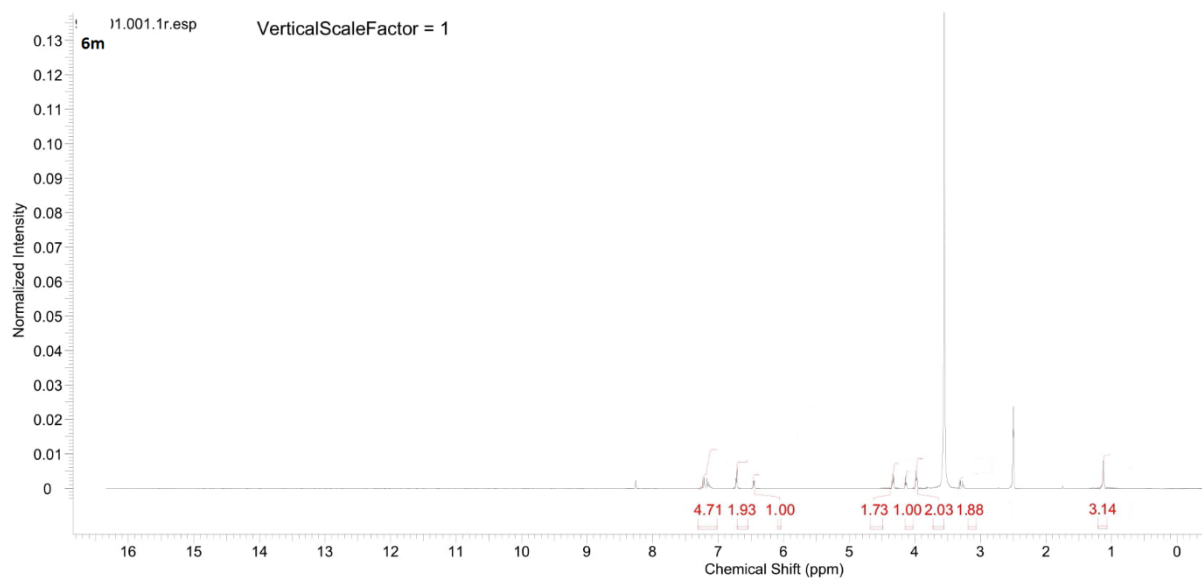

Compound 6n

$^{13}\text{C}$  NMR spectrum

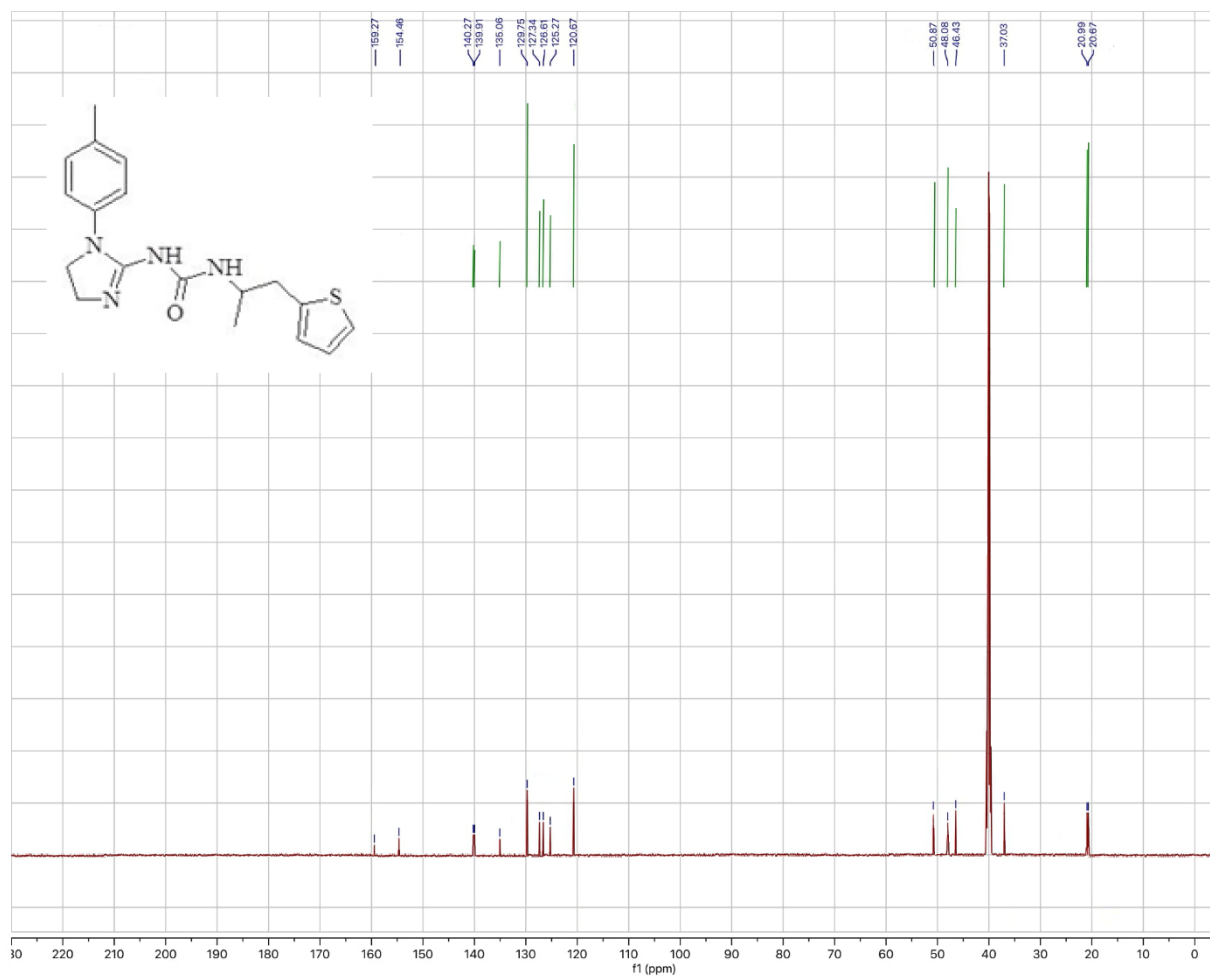

**MS spectrum:** C<sub>18</sub>H<sub>22</sub>N<sub>4</sub>OS (m.m. calc. 343.1587). HRMS (ESI)  $m/z$  [M+H]<sup>+</sup>: 343.1728.

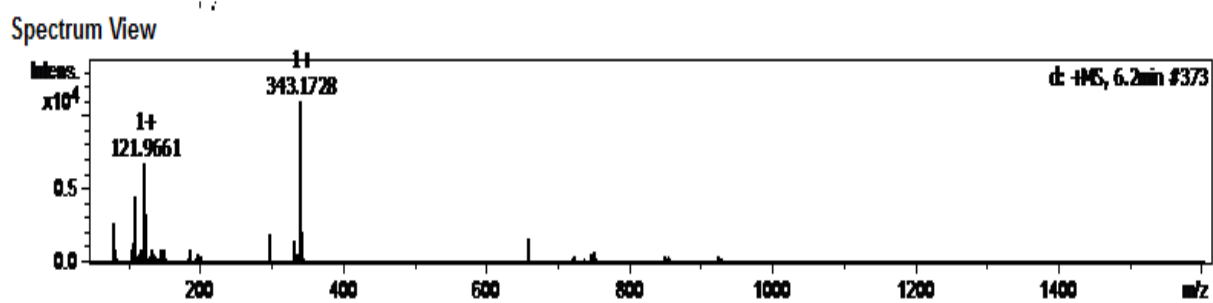

<sup>1</sup>H NMR spectrum

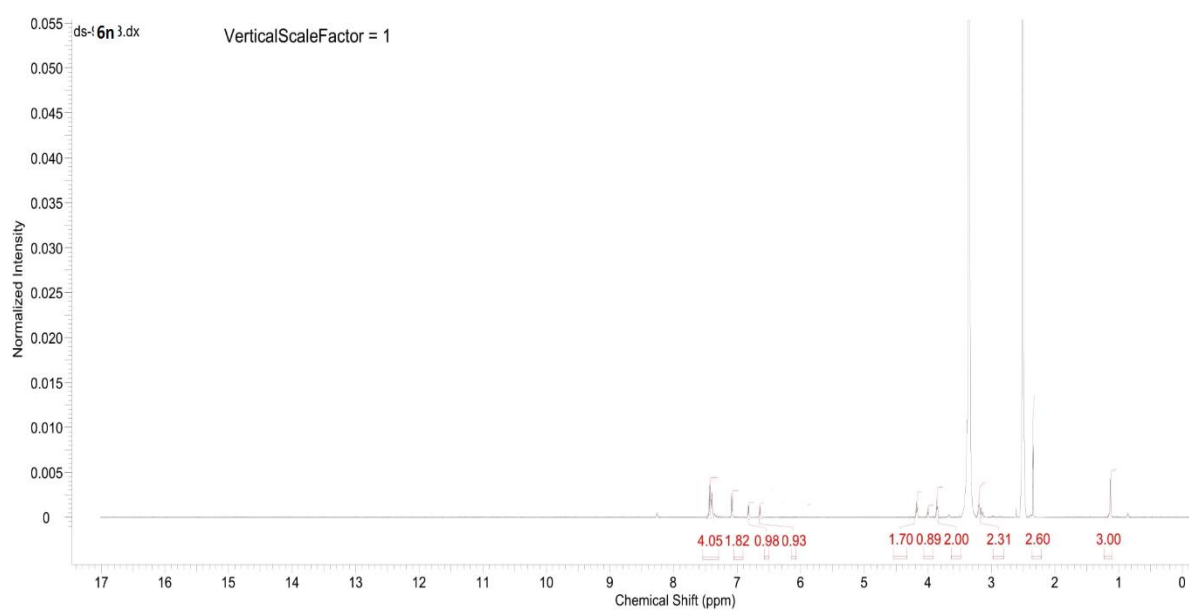

# Compound 6o

## <sup>13</sup>C NMR spectrum

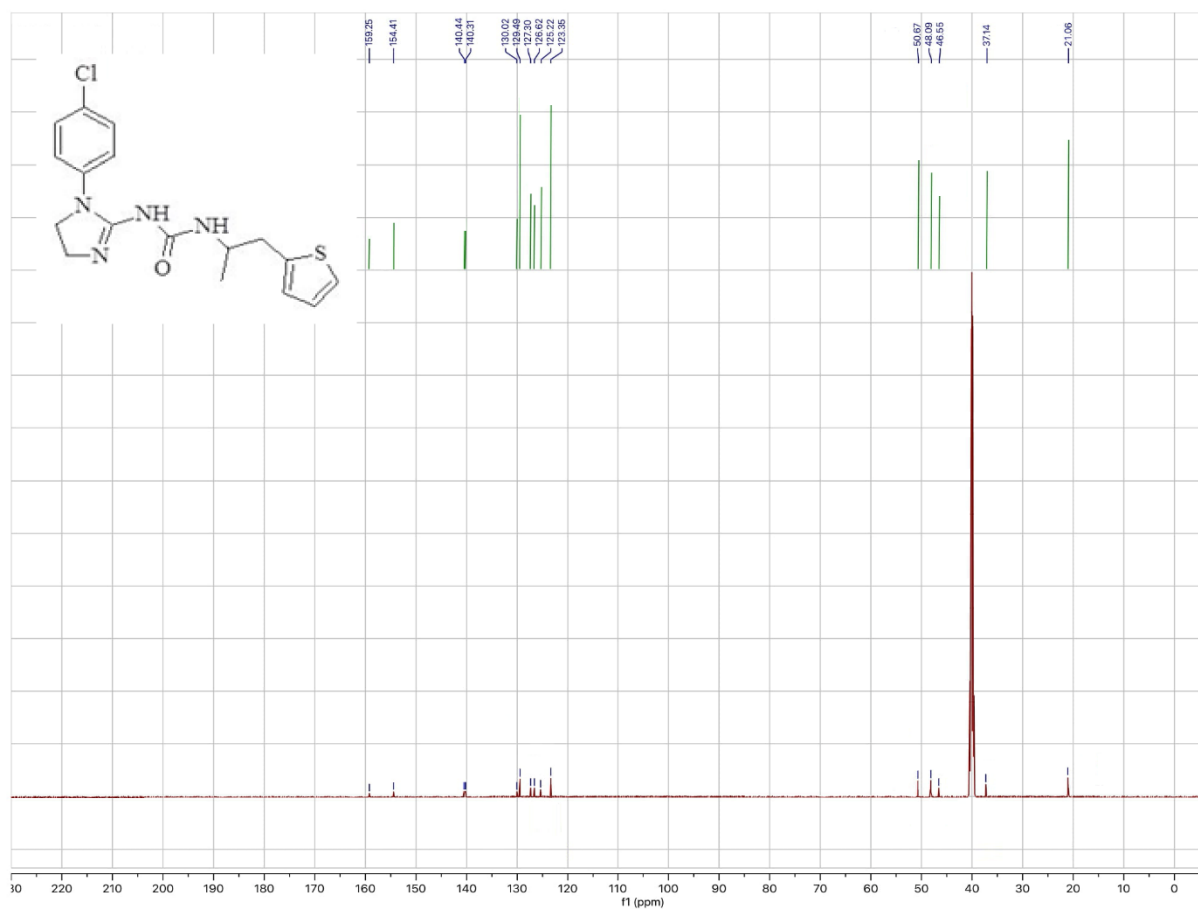

**MS spectrum:** C<sub>17</sub>H<sub>19</sub>ClN<sub>4</sub>OS (m.m. calc. 363.1041). HRMS (ESI) *m/z* [M+H]<sup>+</sup>: 363.1733.

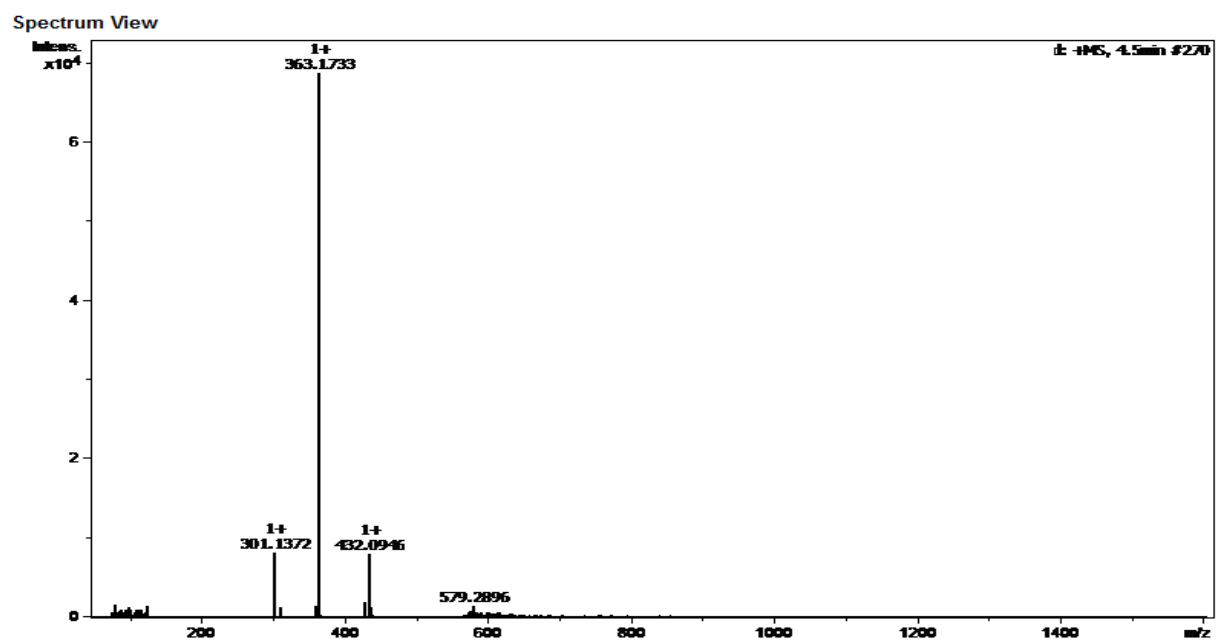

## <sup>1</sup>H NMR spectrum

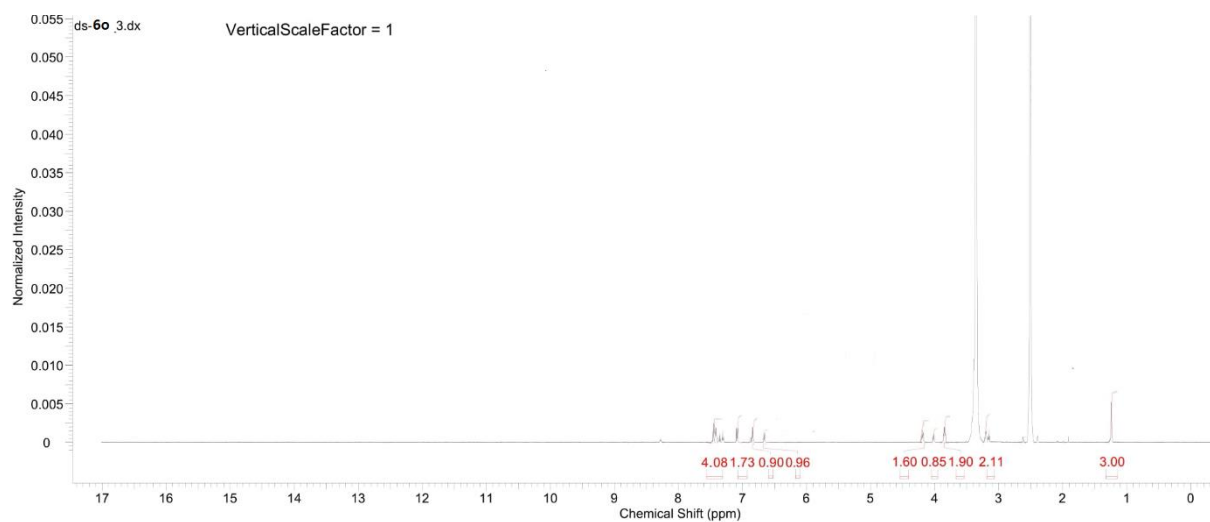

## Compound 6p

## <sup>13</sup>C NMR spectrum

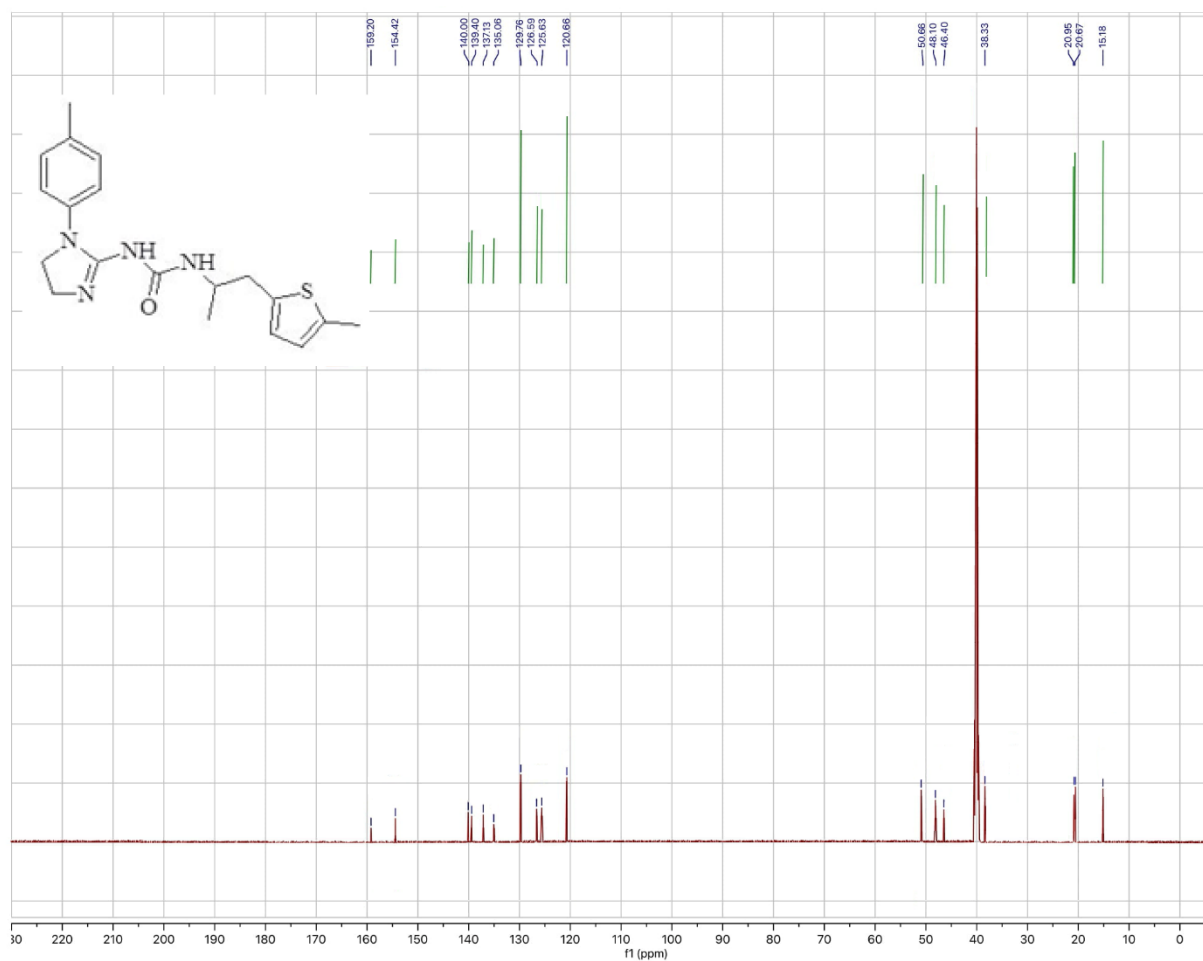

**MS spectrum:** C<sub>19</sub>H<sub>24</sub>N<sub>4</sub>OS (m.m. calc. 357.1744). HRMS (ESI)  $m/z$  [M+H]<sup>+</sup>: 357.2069.

**Spectrum View**

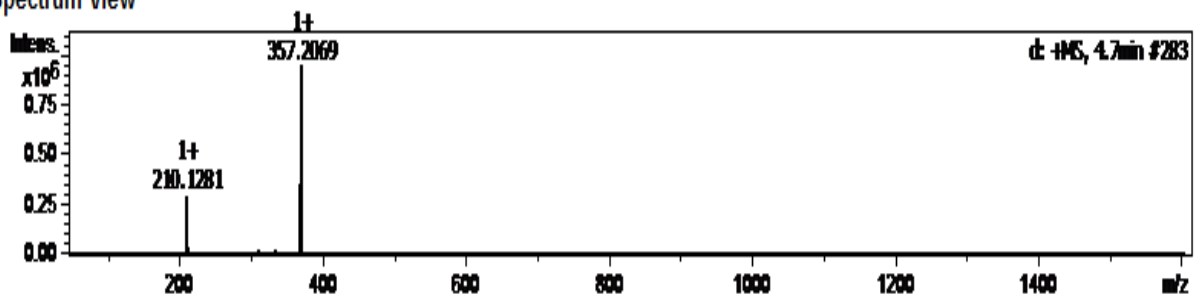

**<sup>1</sup>H NMR spectrum**

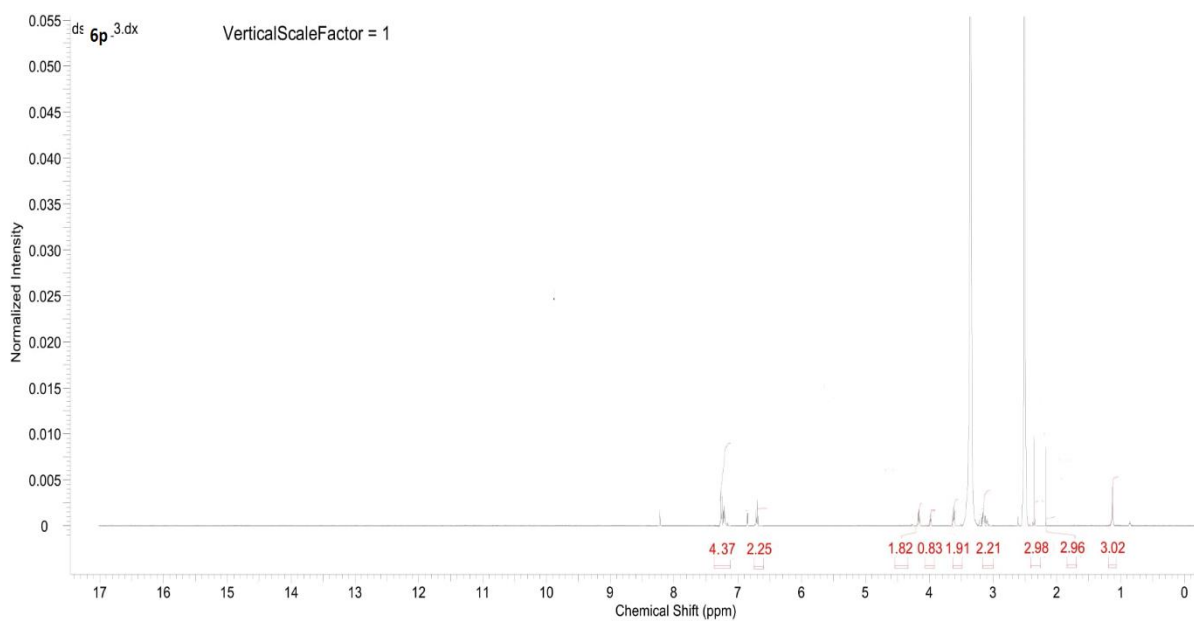

# Compound 6r

## <sup>13</sup>C NMR spectrum

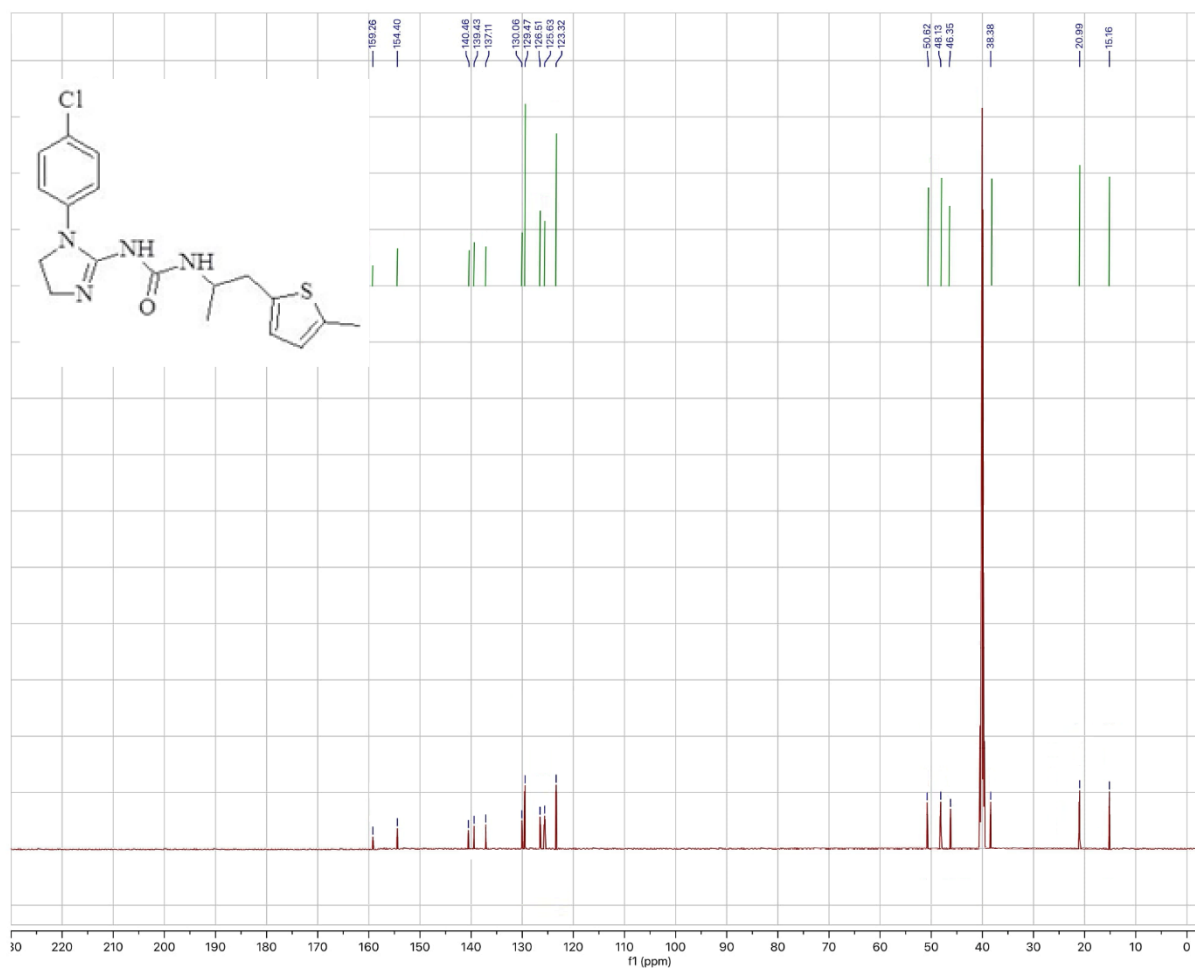

MS spectrum: C<sub>18</sub>H<sub>21</sub>ClN<sub>4</sub>OS (m.m. calc. 377.1197). HRMS (ESI) *m/z* [M+H]<sup>+</sup>: 377.1178.

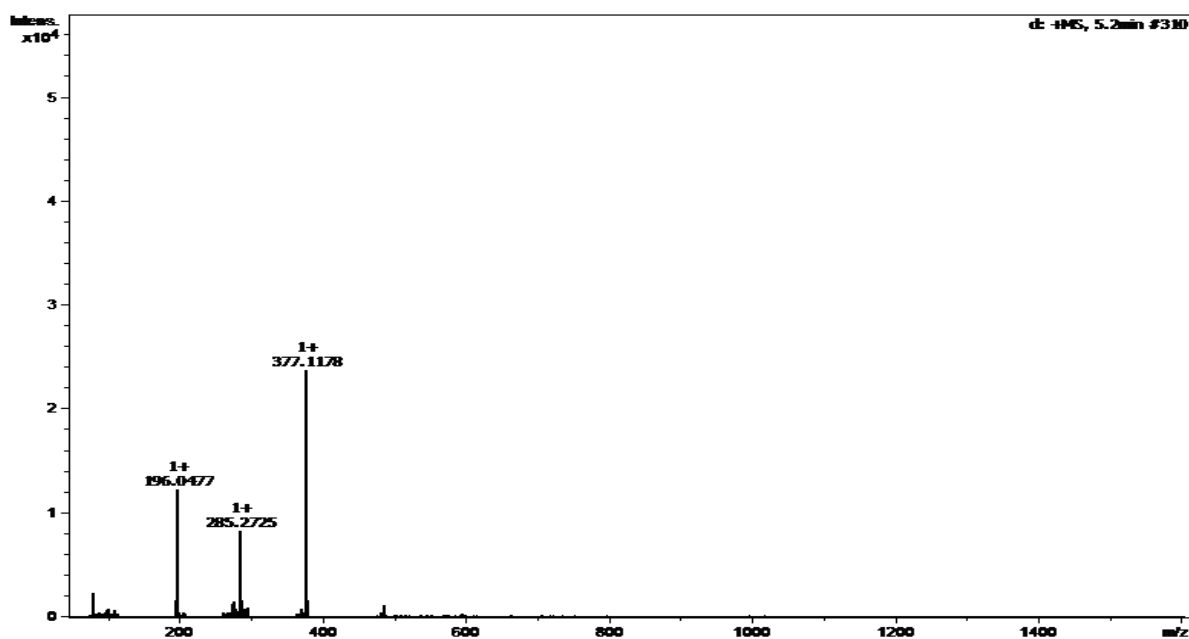

# <sup>1</sup>H NMR spectrum

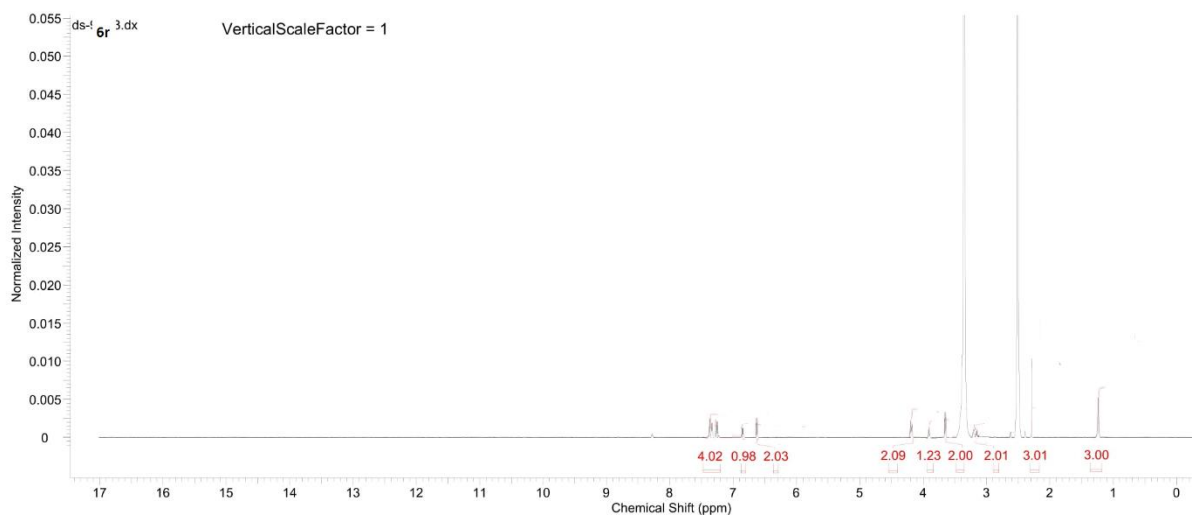

## Compound 7a

# <sup>13</sup>C NMR spectrum

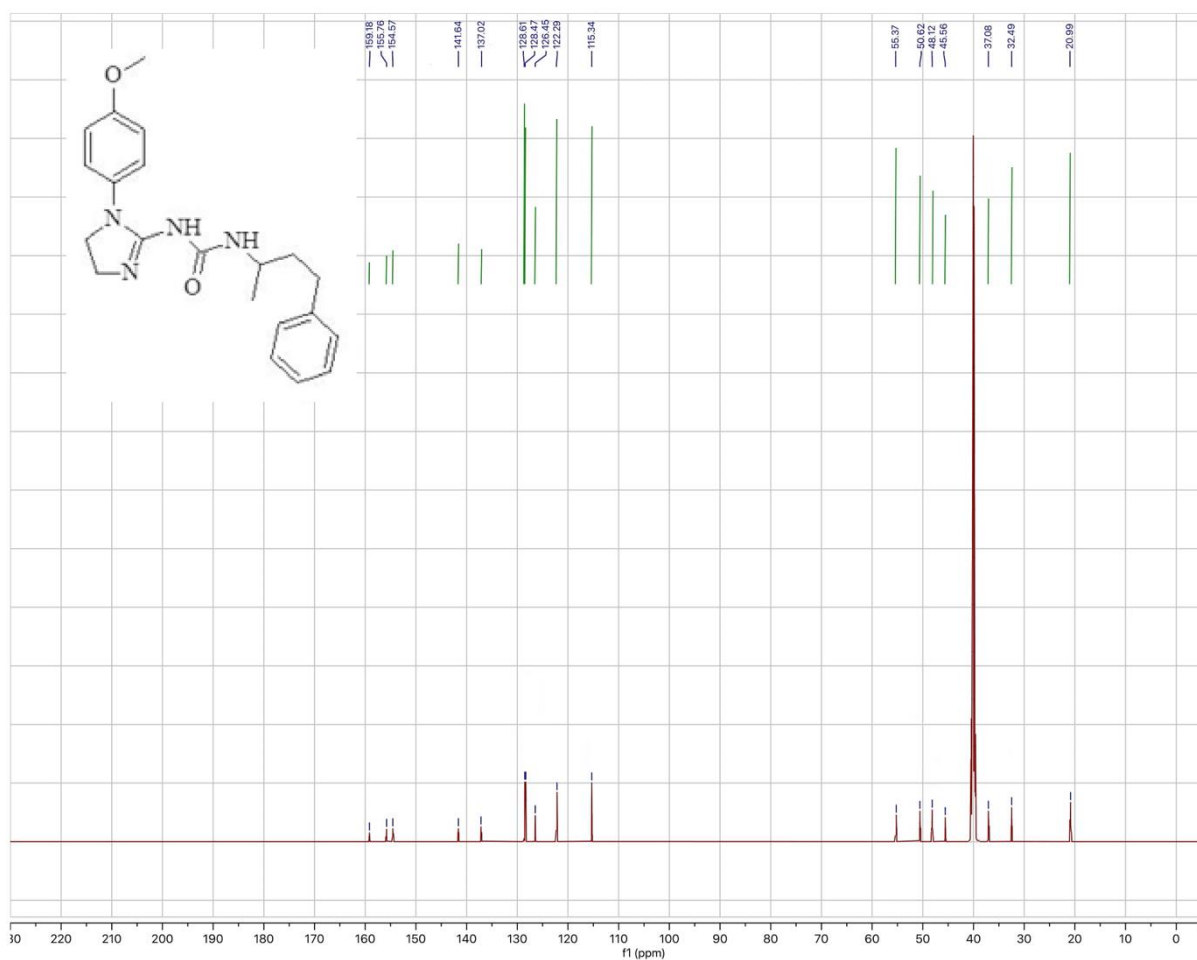

**MS spectrum:**  $C_{21}H_{26}N_4O_2$  (m.m. calc. 367.2128). HRMS (ESI)  $m/z$   $[M+H]^+$ : 367.2181.

### Spectrum View

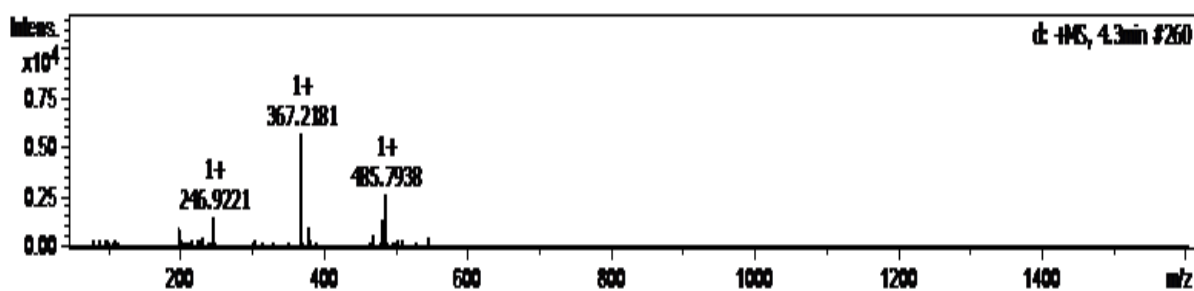

### $^1H$ NMR spectrum

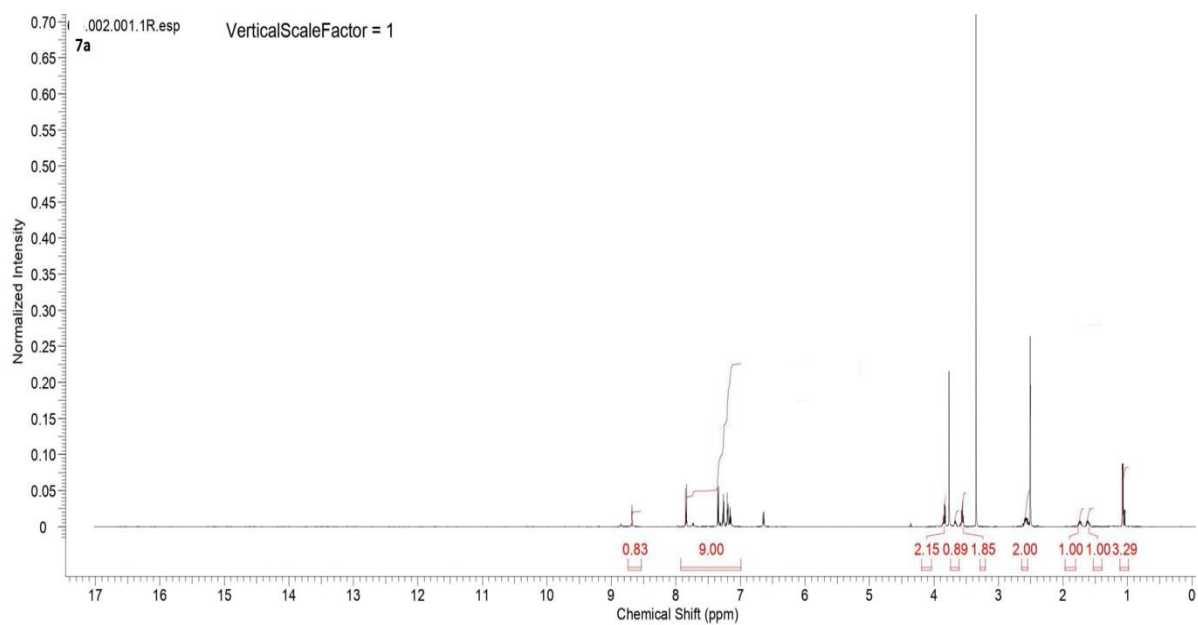

## Compound 7b

### $^{13}\text{C}$ NMR spectrum

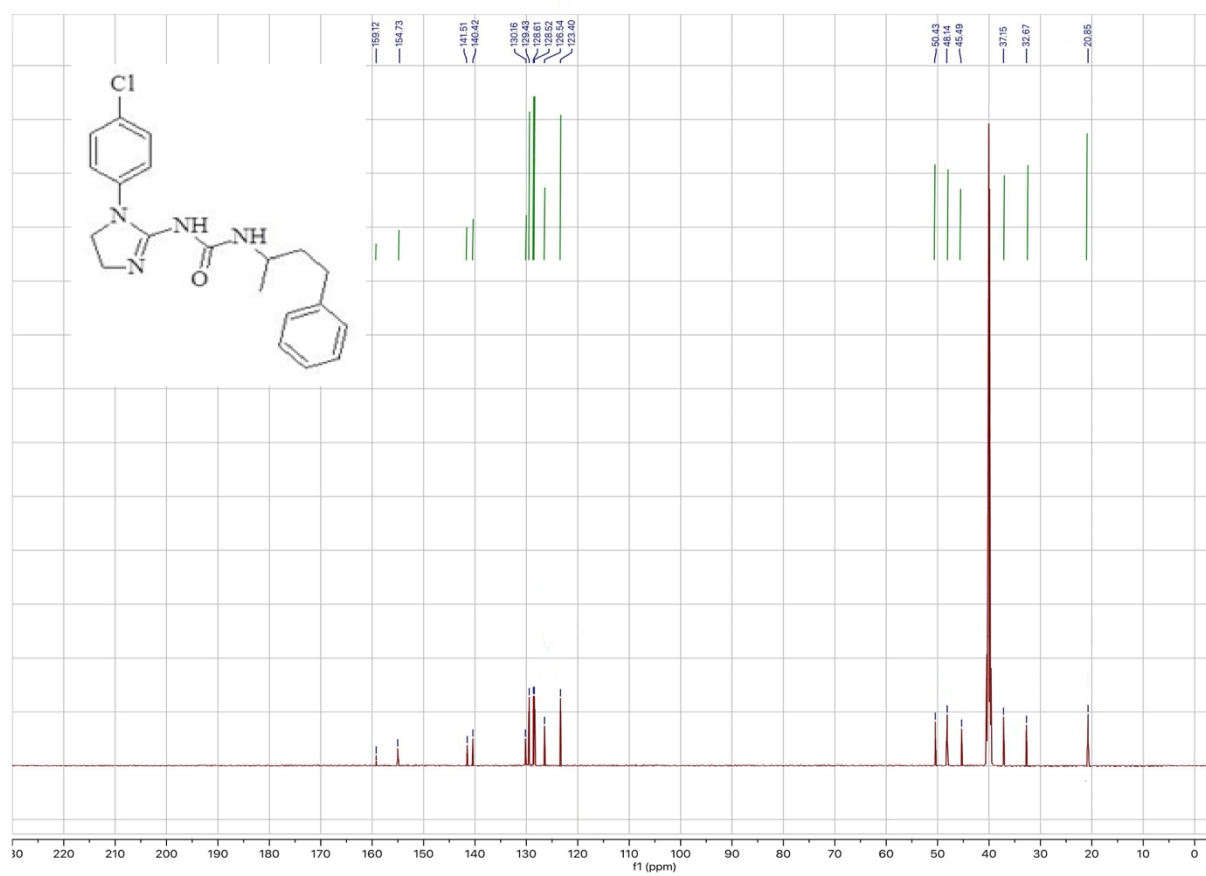

MS spectrum:  $\text{C}_{20}\text{H}_{23}\text{ClN}_4\text{O}$  (m.m. calc. 371.1633). HRMS (ESI)  $m/z$   $[\text{M}+\text{H}]^+$ : 371.1720.

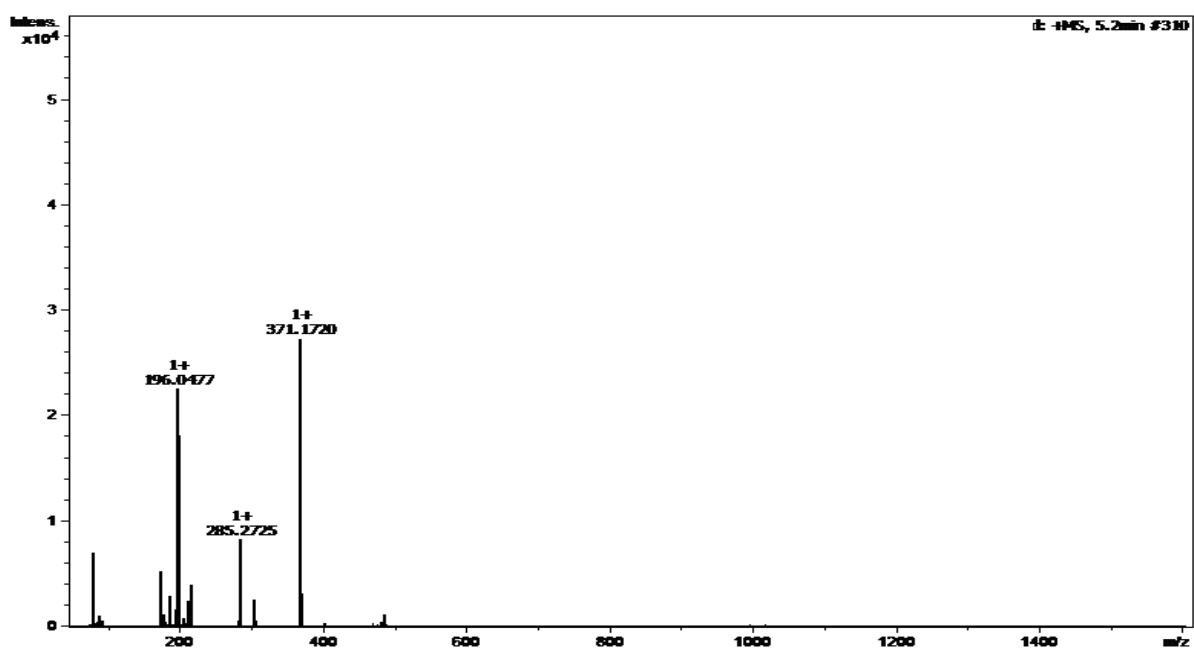

# <sup>1</sup>H NMR spectrum

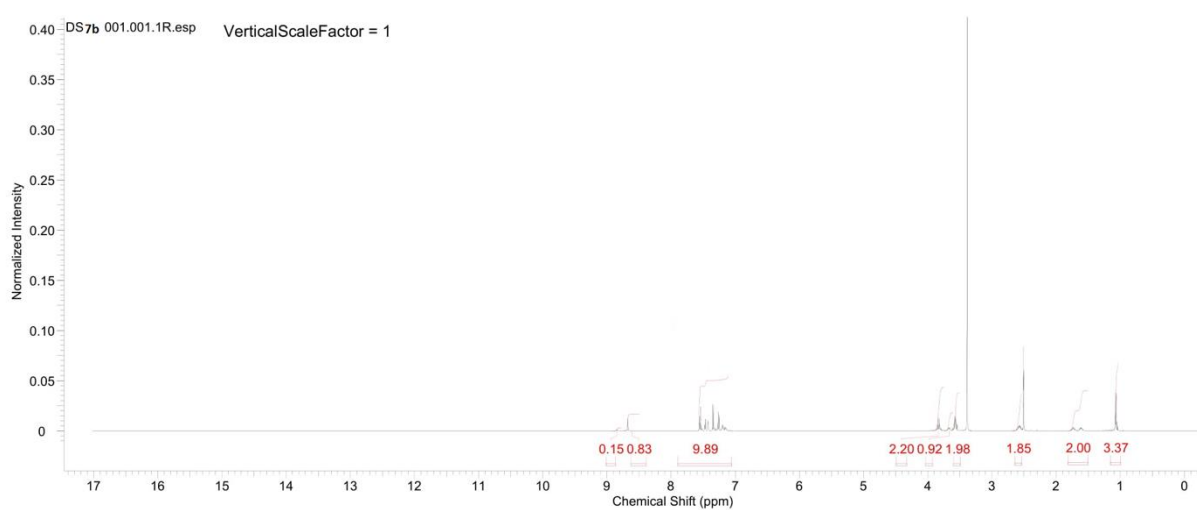

## Compound 7c

# <sup>13</sup>C NMR spectrum

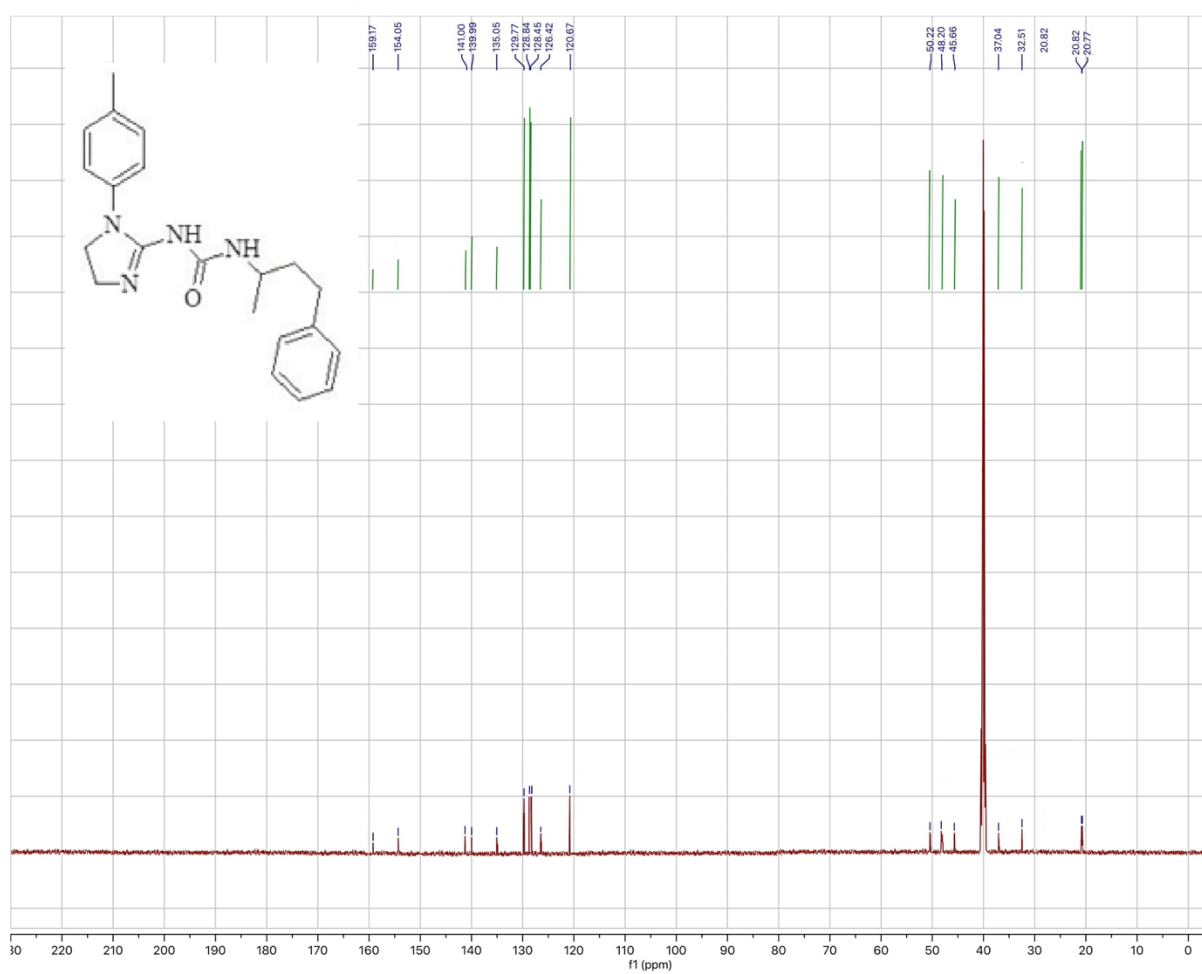

**MS spectrum:** C<sub>21</sub>H<sub>26</sub>N<sub>4</sub>O (m.m. calc. 351.2179). HRMS (ESI)  $m/z$  [M+H]<sup>+</sup>: 351.2234.

**Spectrum View**

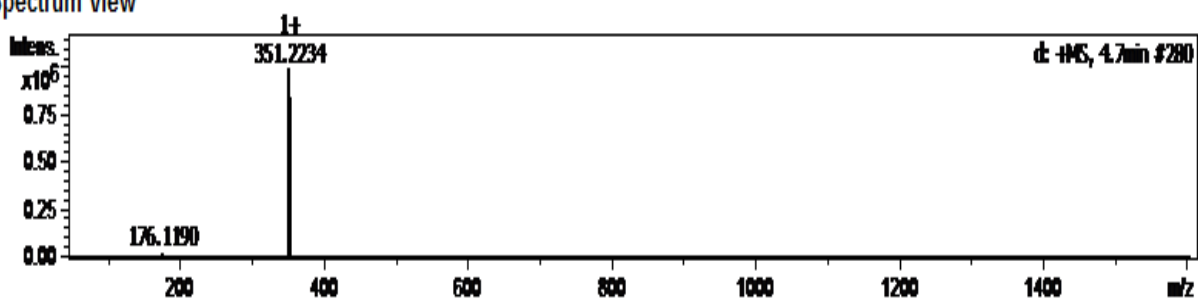

**<sup>1</sup>H NMR spectrum**

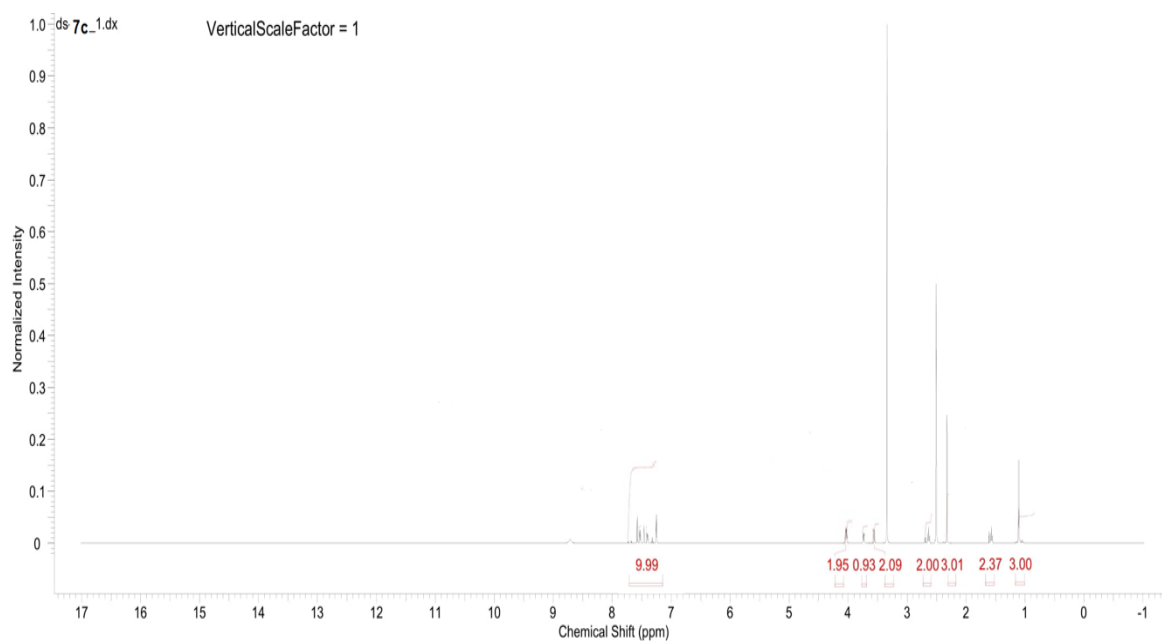

# Compound 7d

## <sup>13</sup>C NMR spectrum

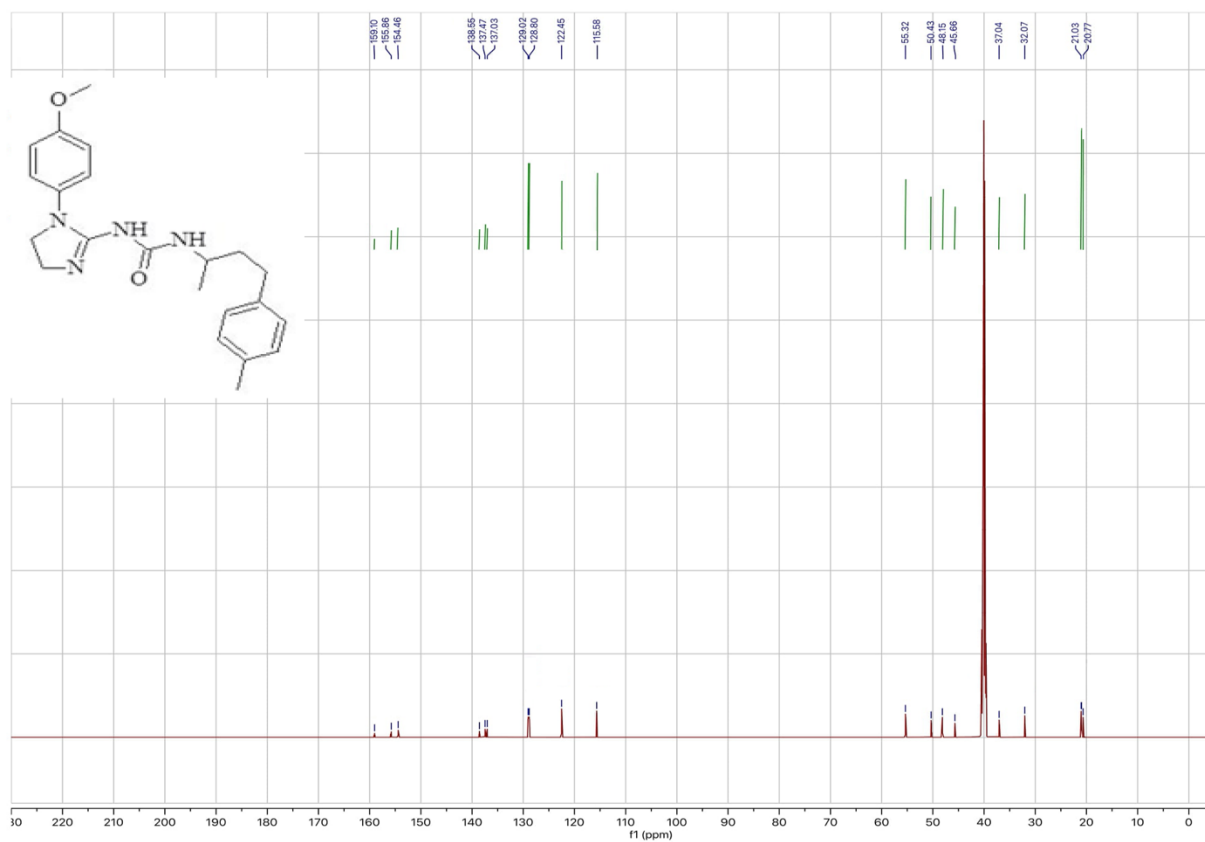

**MS spectrum:** C<sub>22</sub>H<sub>28</sub>N<sub>4</sub>O<sub>2</sub> (m.m. calc. 381.2285). HRMS (ESI) *m/z* [M+H]<sup>+</sup>: 381.1758.

## Spectrum View

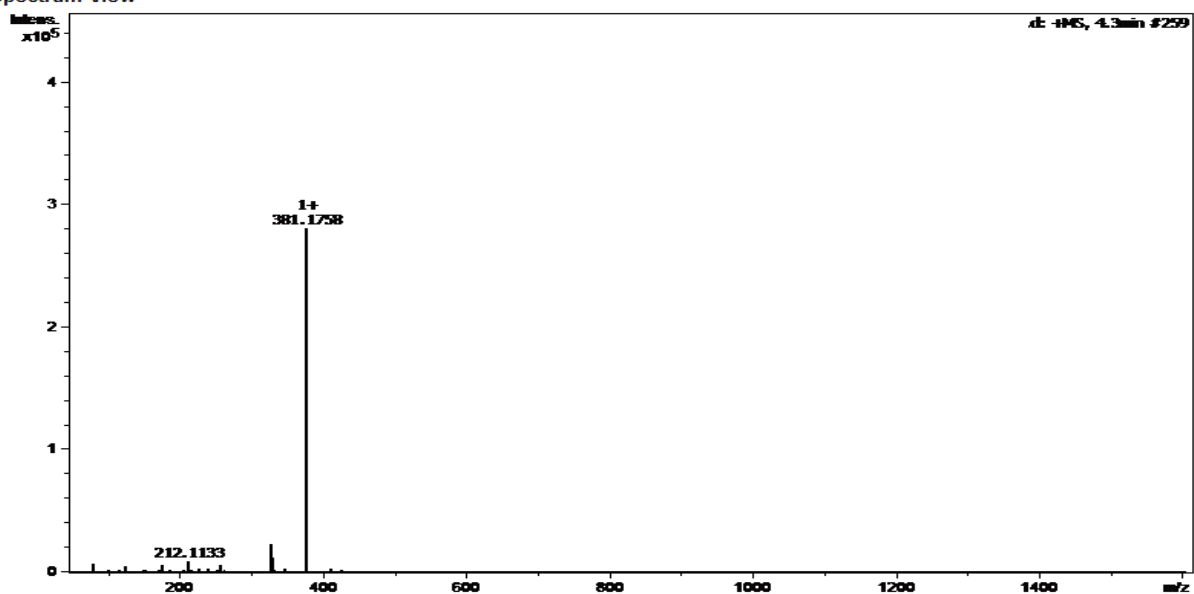

# <sup>1</sup>H NMR spectrum

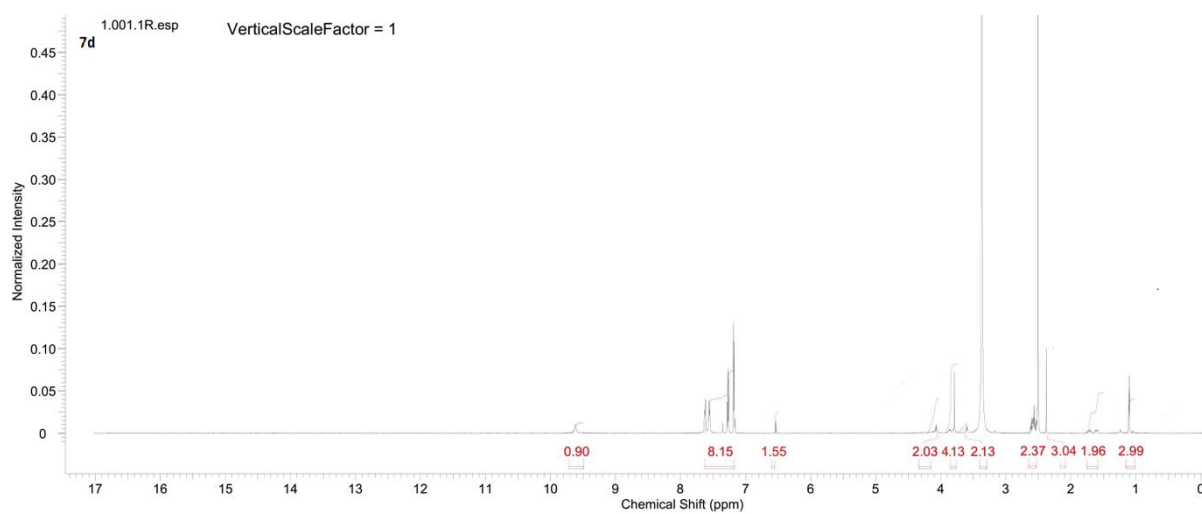

## Compound 7e

# <sup>13</sup>C NMR spectrum

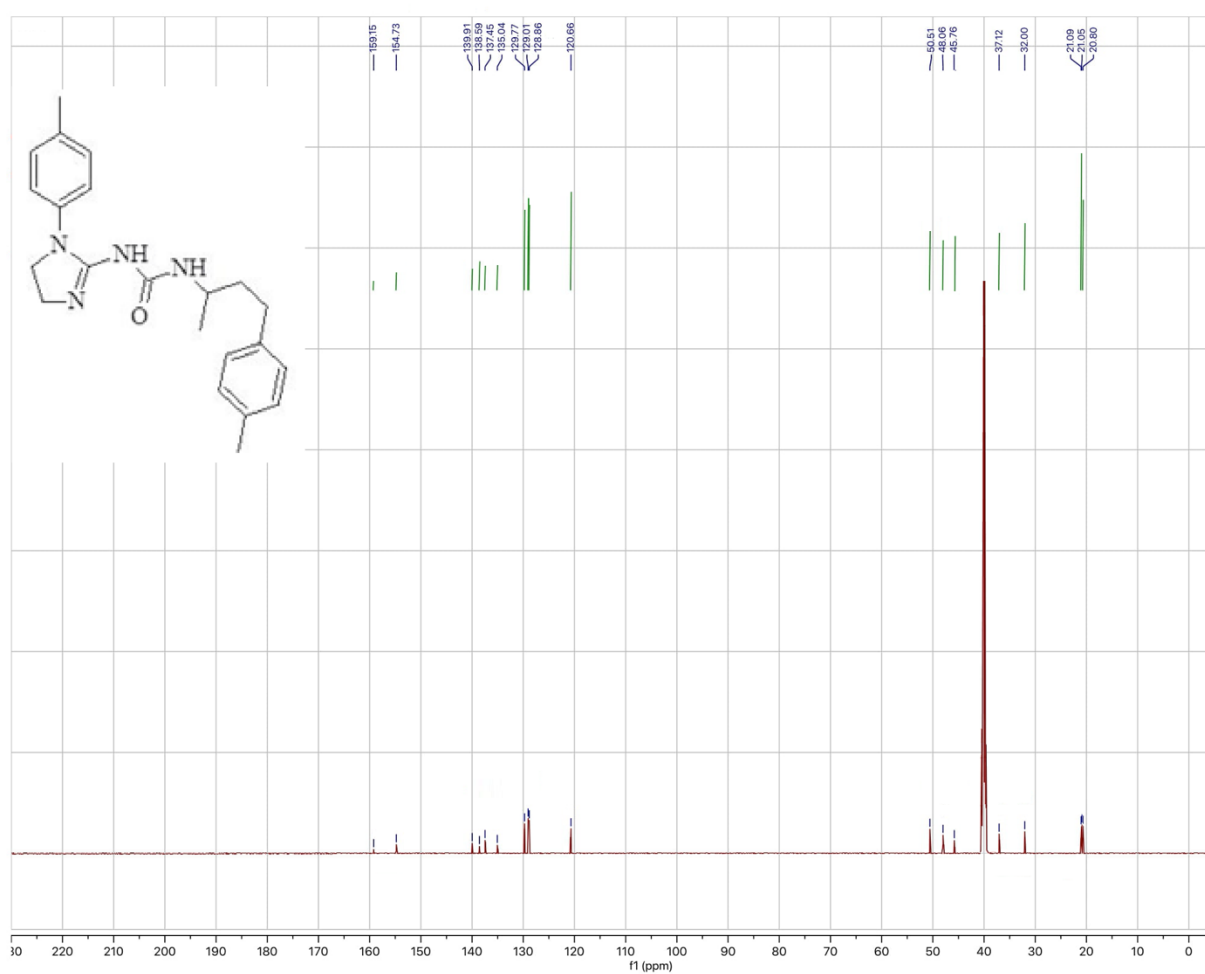

**MS spectrum:**  $C_{22}H_{28}N_4O$  (m.m. calc. 365.2336). HRMS (ESI)  $m/z$   $[M+H]^+$ : 365.2142.

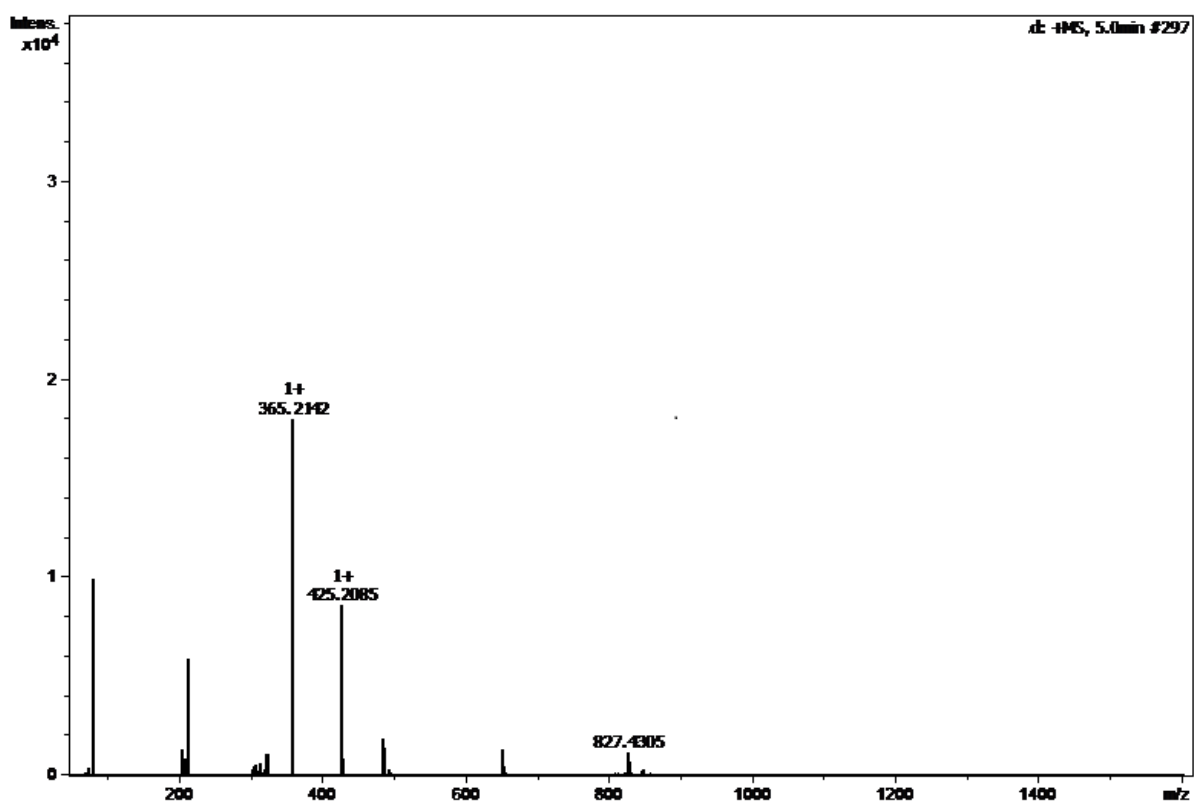

**$^1H$  NMR spectrum**

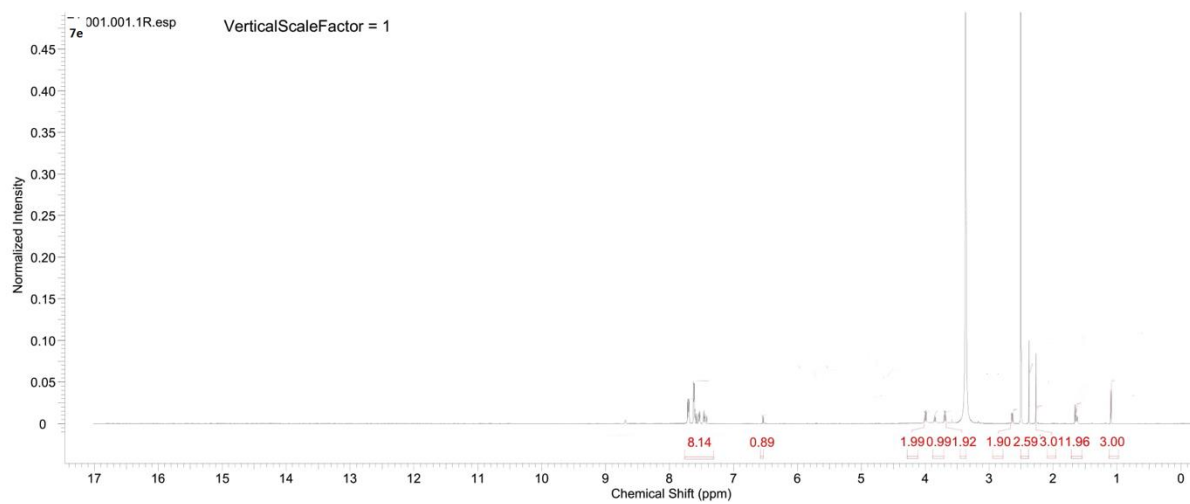

# Compound 7f

## <sup>13</sup>C NMR spectrum

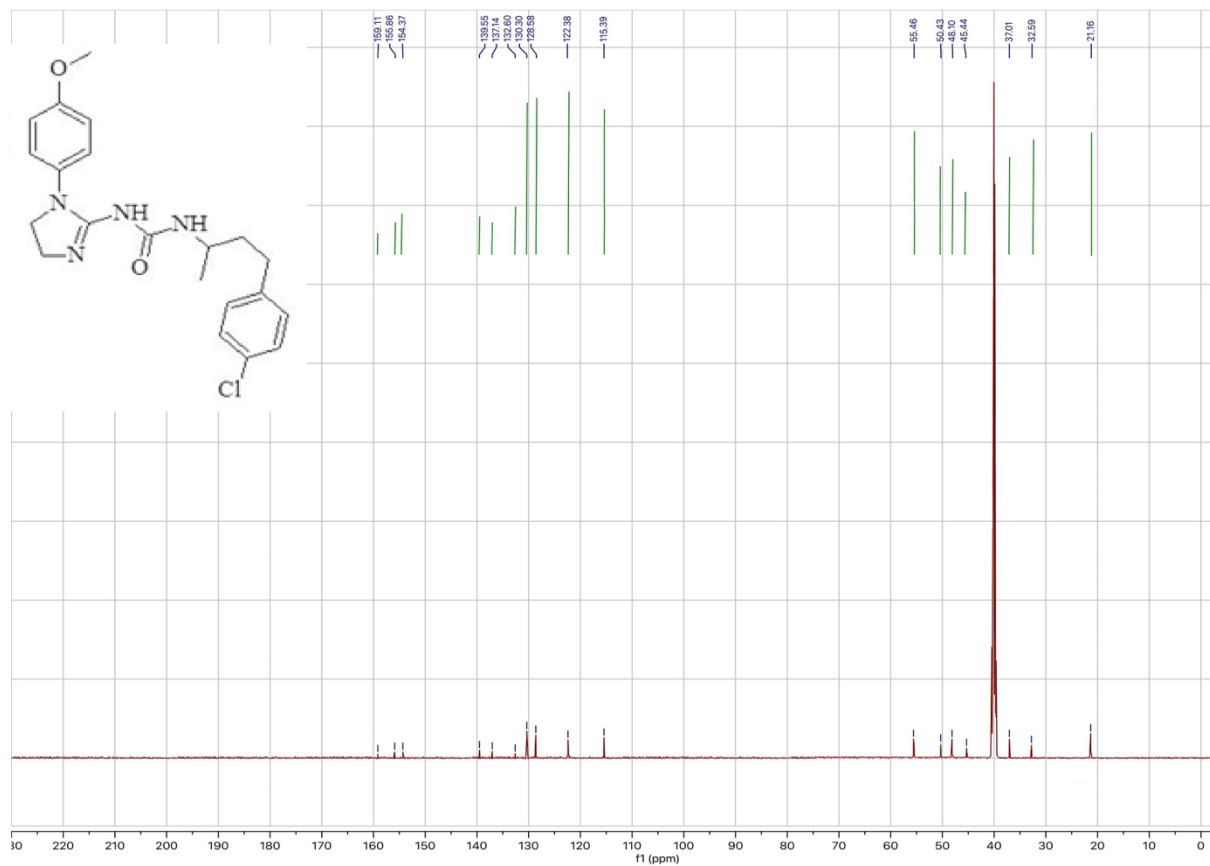

MS spectrum: C<sub>21</sub>H<sub>25</sub>ClN<sub>4</sub>O<sub>2</sub> (m.m. calc. 401.1739). HRMS (ESI) *m/z* [M+H]<sup>+</sup>: 401.1365.

## Spectrum View

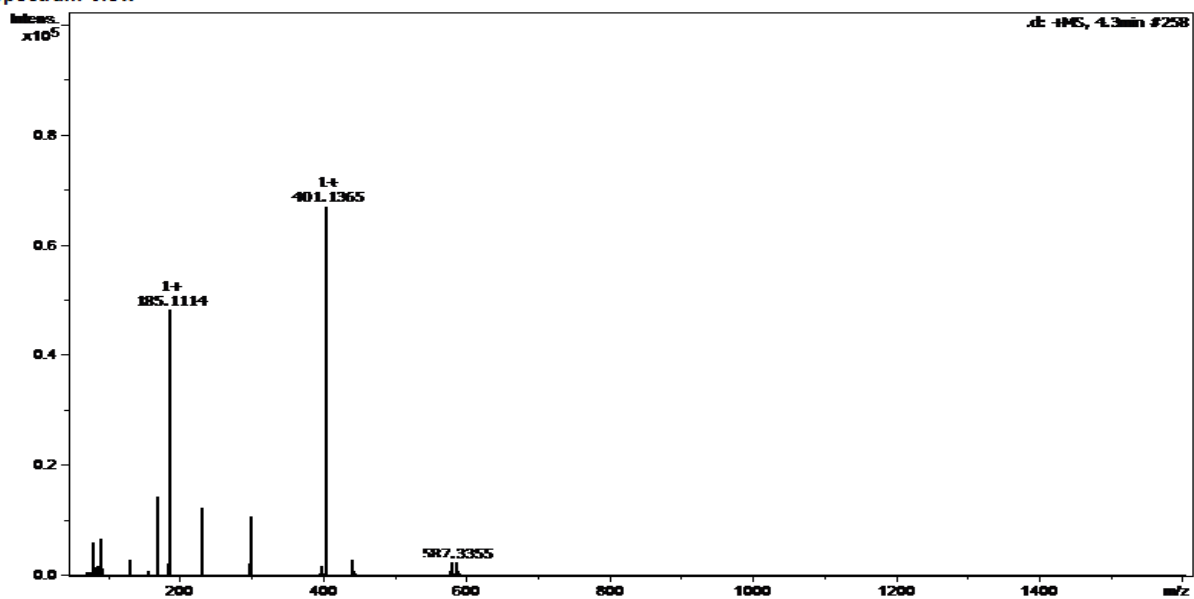

# <sup>1</sup>H NMR spectrum

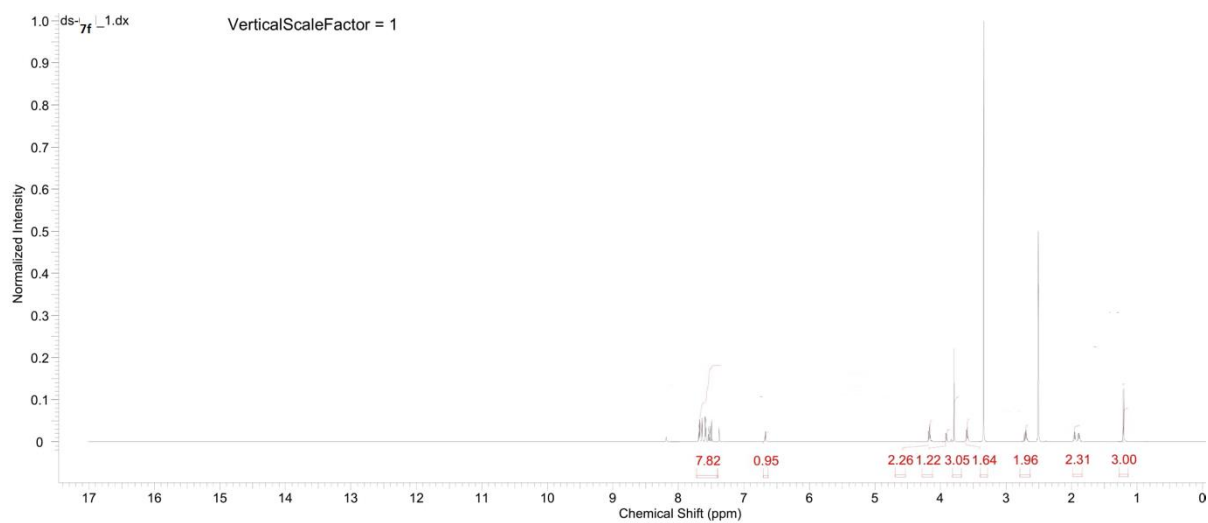

## Compound 7g

# <sup>13</sup>C NMR spectrum

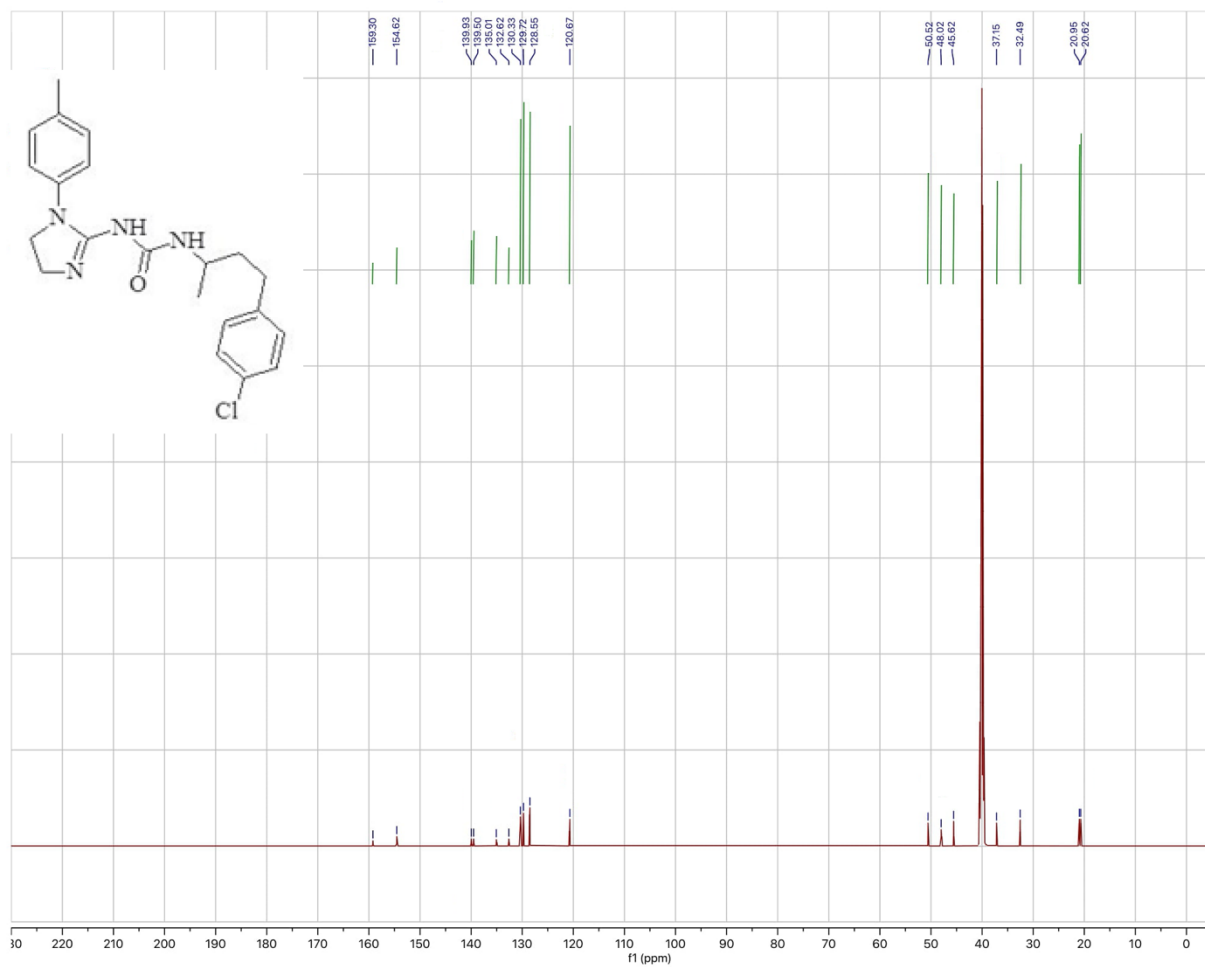

**MS spectrum:** C<sub>21</sub>H<sub>25</sub>ClN<sub>4</sub>O (m.m. calc. 385.1790). HRMS (ESI)  $m/z$  [M+H]<sup>+</sup>: 385.1604.

**Spectrum View**

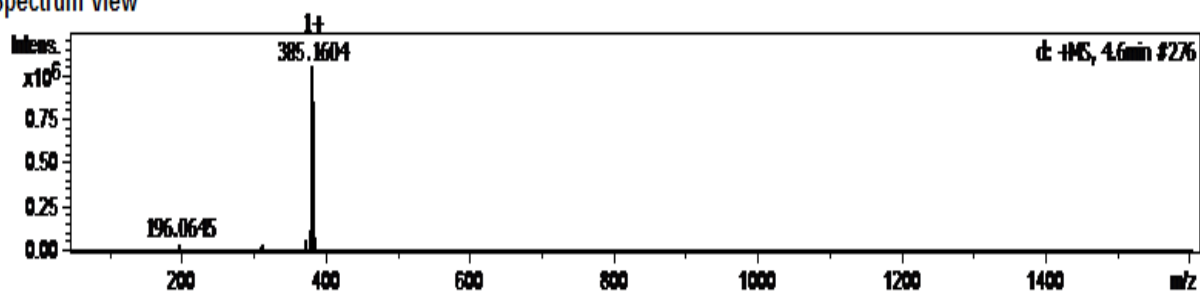

**<sup>1</sup>H NMR spectrum**

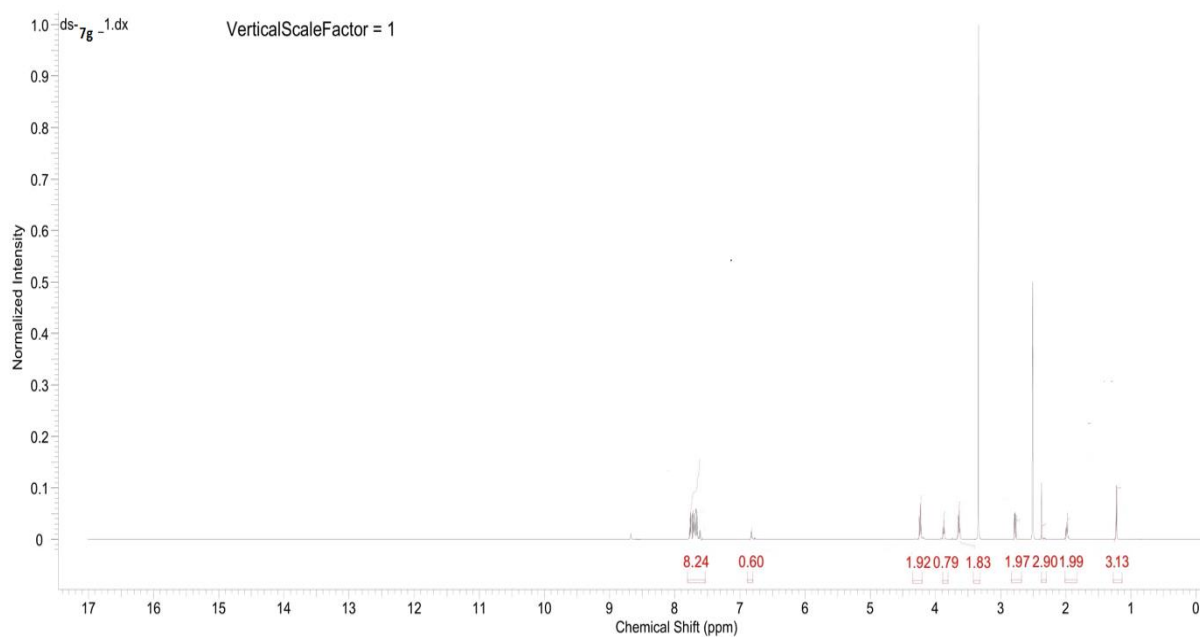

# Compound 7h

## <sup>13</sup>C NMR spectrum

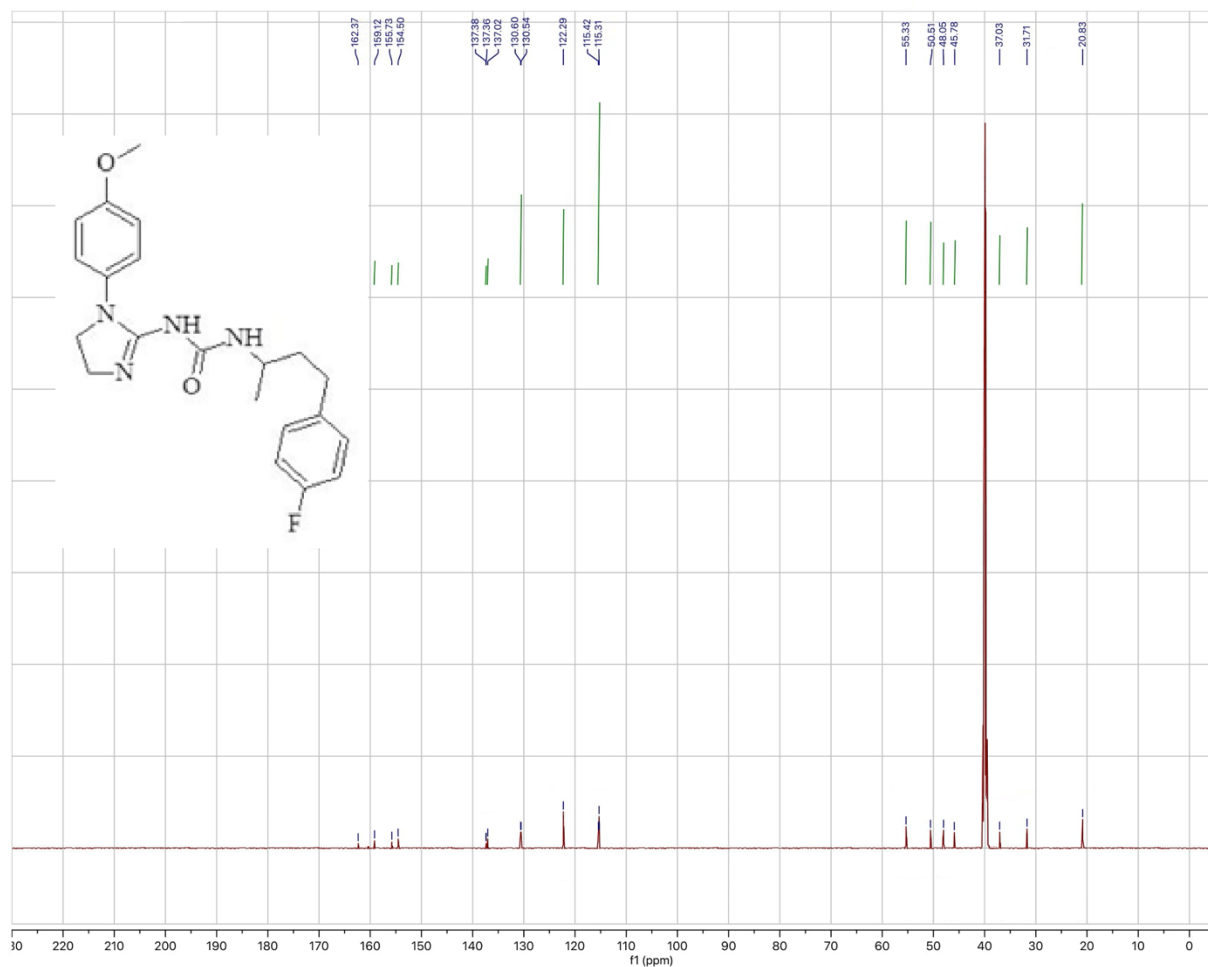

MS spectrum: C<sub>21</sub>H<sub>25</sub>FN<sub>4</sub>O<sub>2</sub> (m.m. calc. 385.2034). HRMS (ESI) *m/z* [M+H]<sup>+</sup>: 385.2501.

## Spectrum View

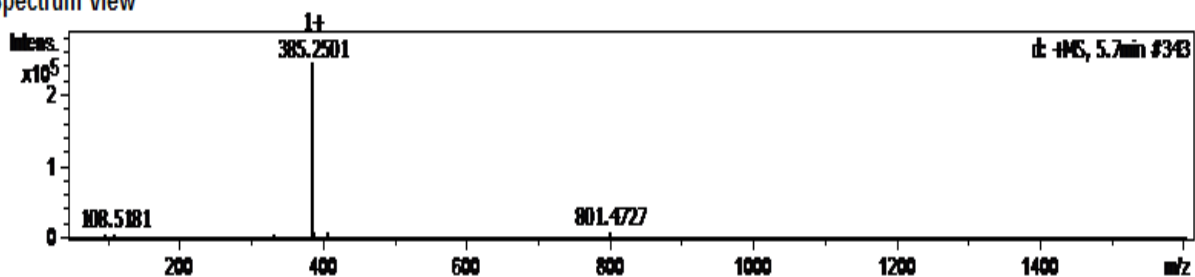

## <sup>1</sup>H NMR spectrum

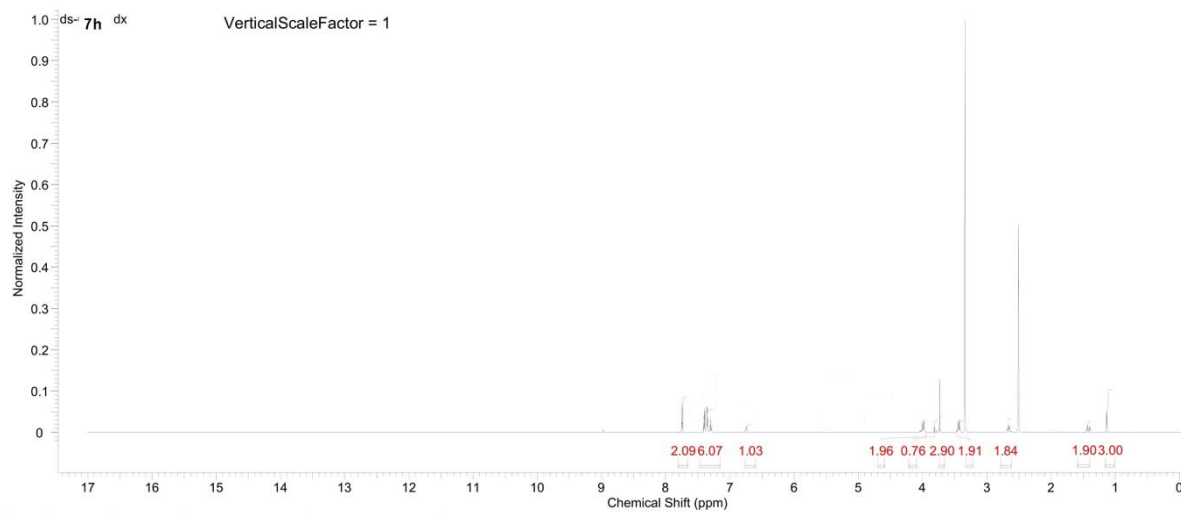

## Compound 7i

## <sup>13</sup>C NMR spectrum

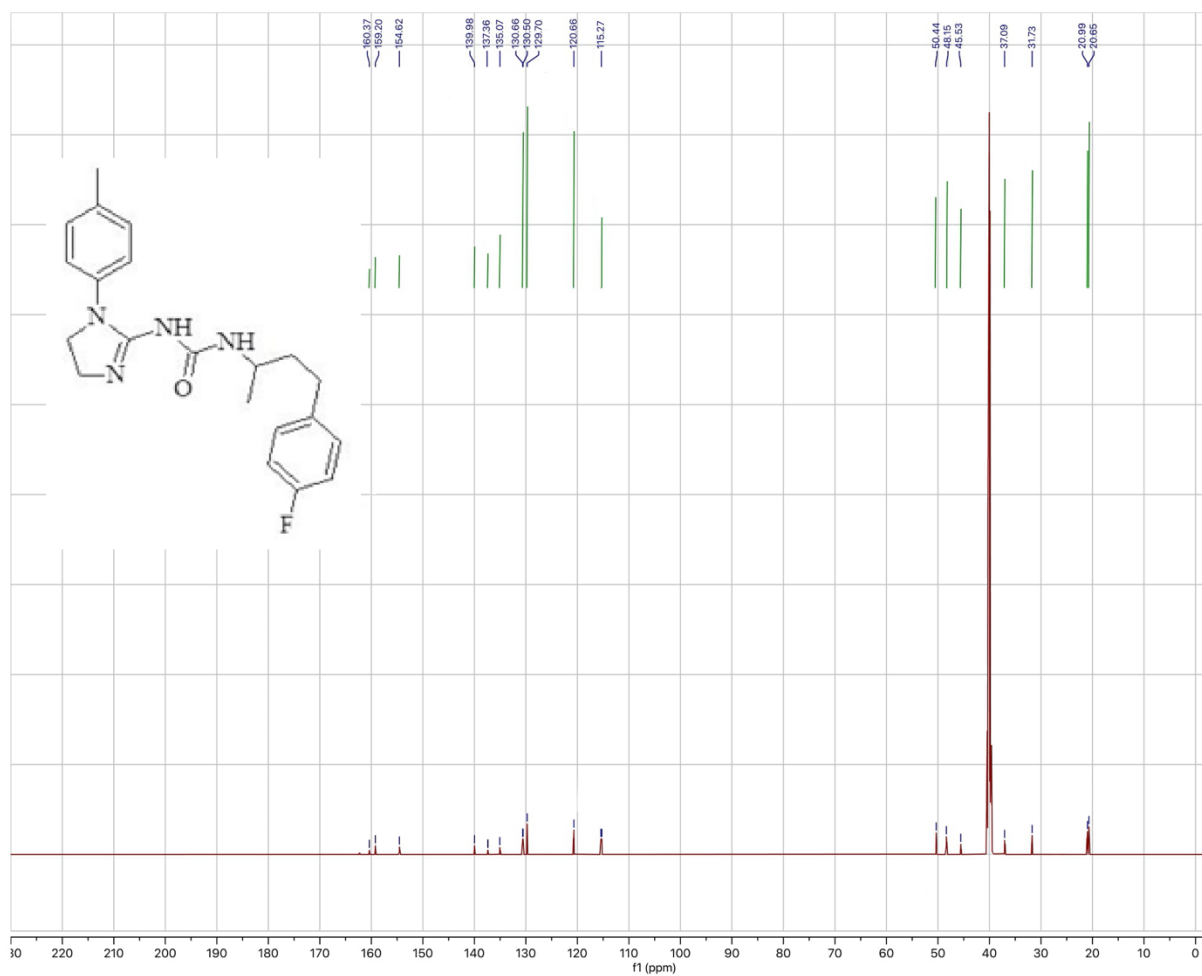

**MS spectrum:** C<sub>21</sub>H<sub>25</sub>FN<sub>4</sub>O (m.m. calc. 369.2085). HRMS (ESI)  $m/z$  [M+H]<sup>+</sup>: 369.2069.

**Spectrum View**

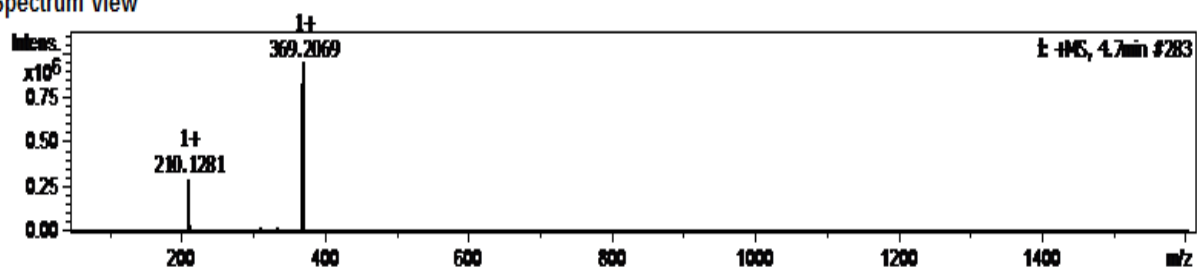

**<sup>1</sup>H NMR spectrum**

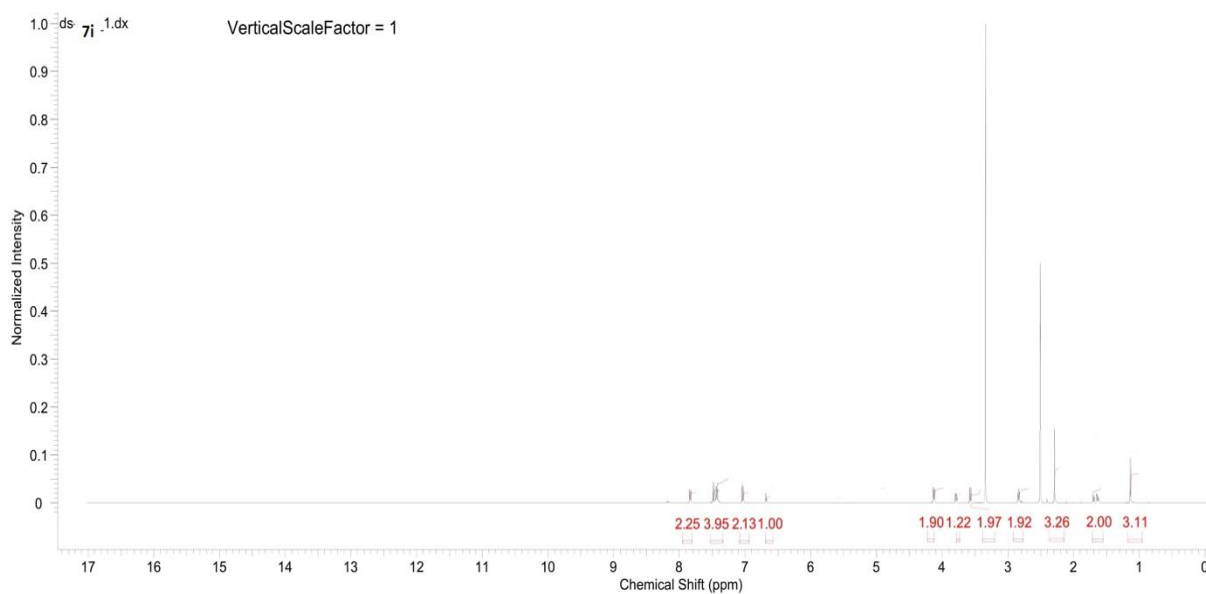

# Compound 7j

## <sup>13</sup>C NMR spectrum

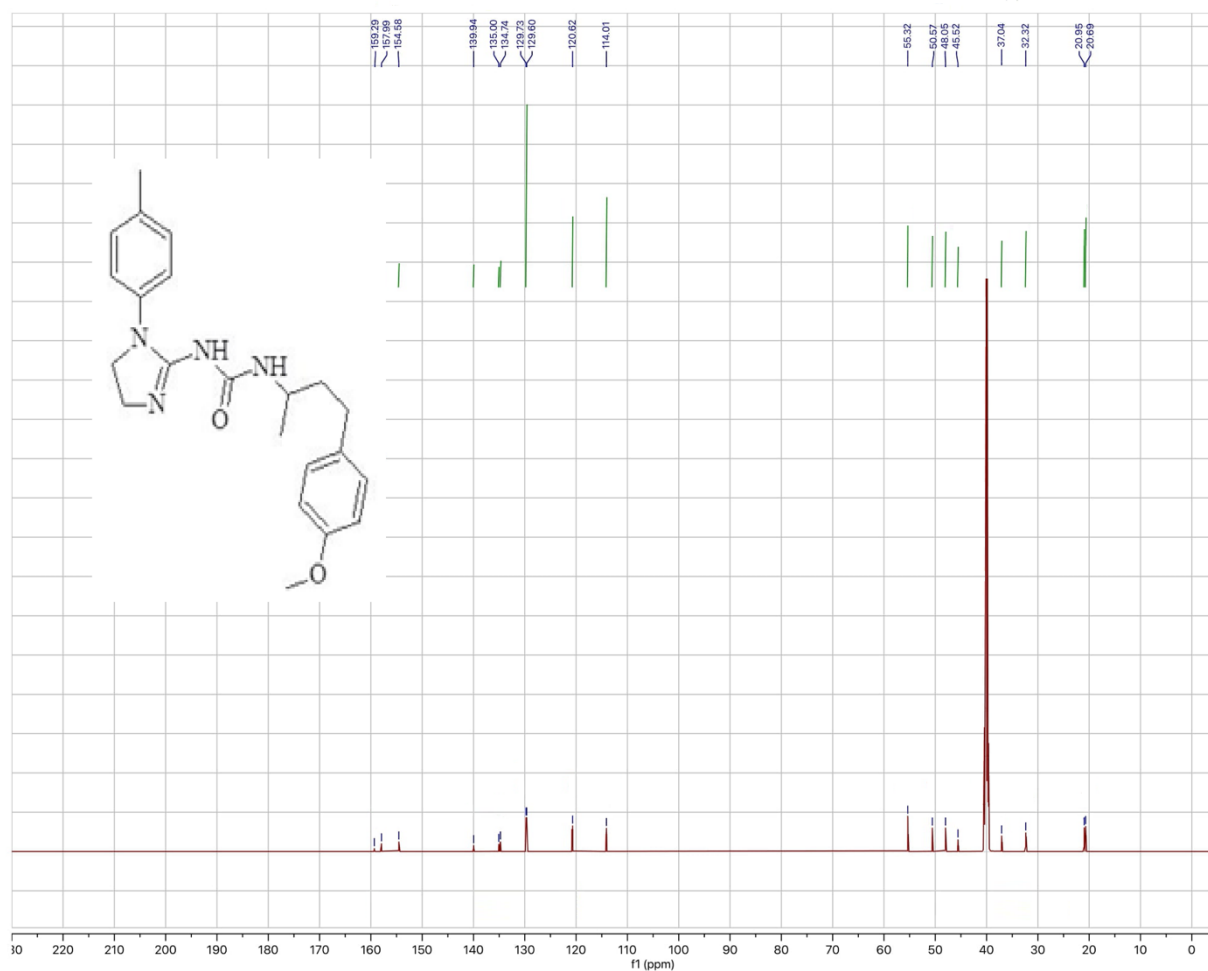

**MS spectrum:** C<sub>22</sub>H<sub>28</sub>N<sub>4</sub>O<sub>2</sub> (m.m. calc. 381.2285). HRMS (ESI) *m/z* [M+H]<sup>+</sup>: 381.234.

## Spectrum View

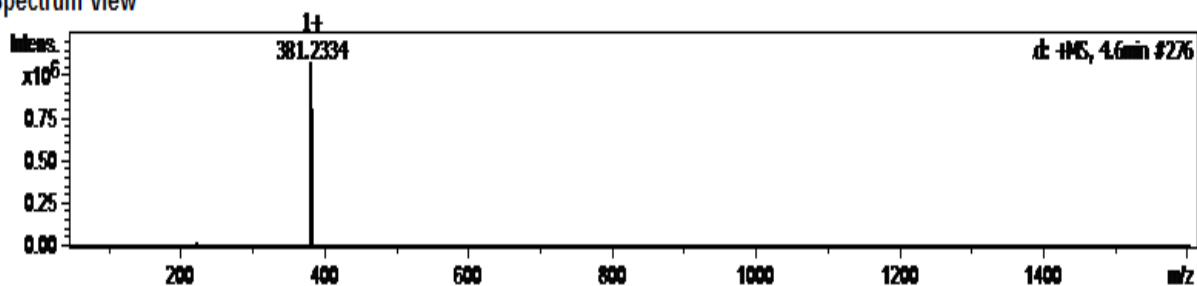

## <sup>1</sup>H NMR spectrum

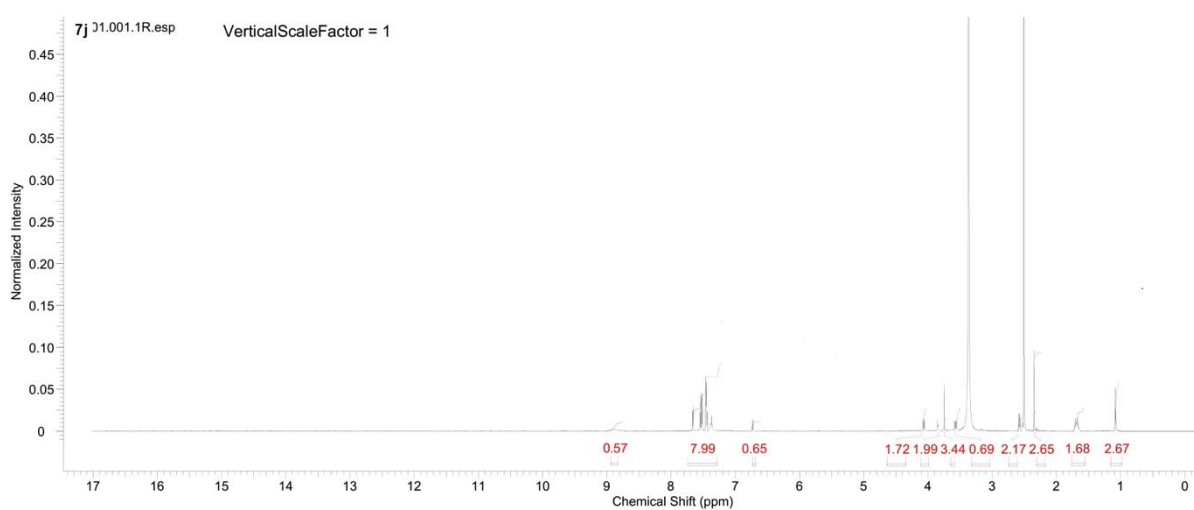

## Compound 7k

## <sup>13</sup>C NMR spectrum

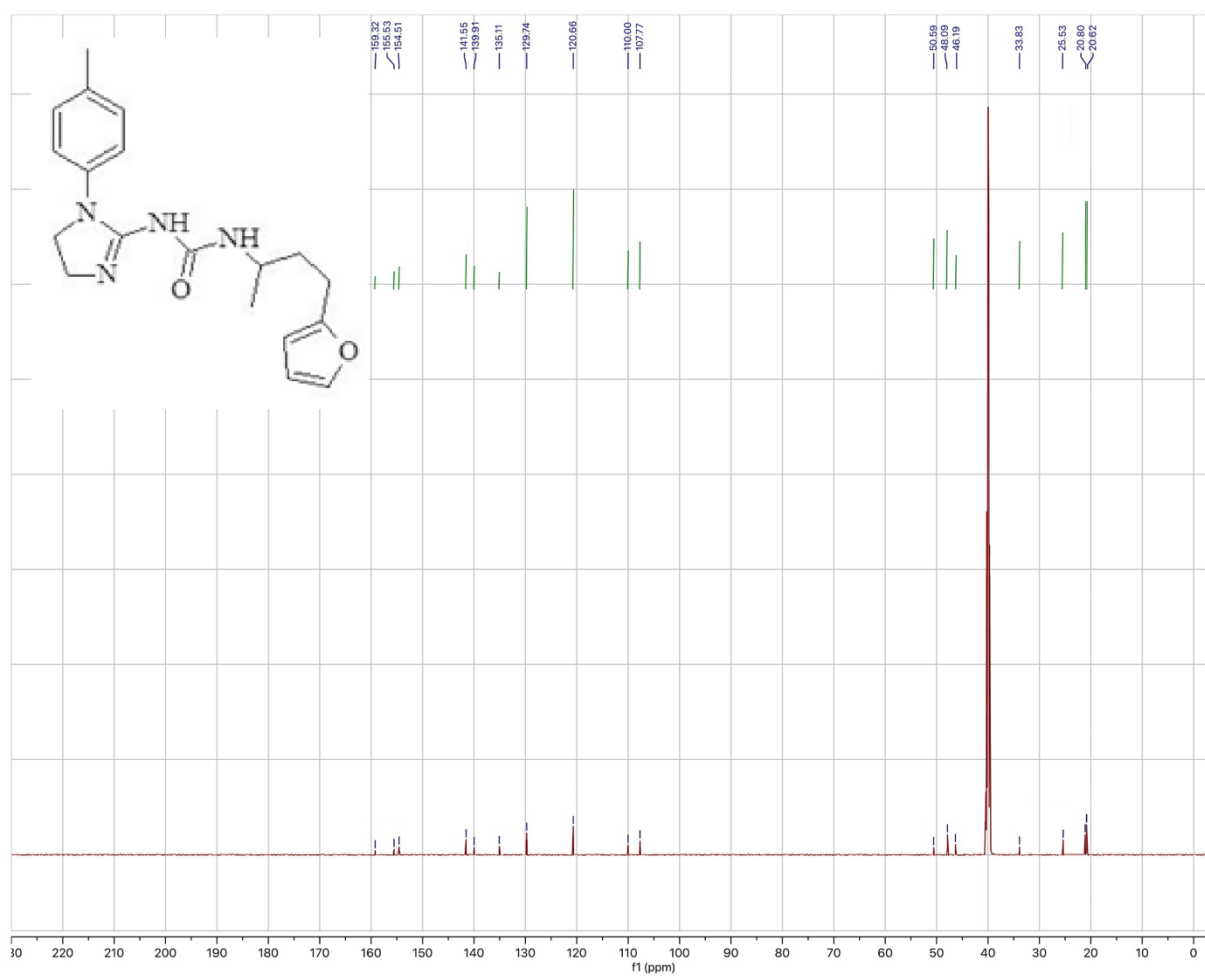

**MS spectrum:** C<sub>19</sub>H<sub>24</sub>N<sub>4</sub>O<sub>2</sub> (m.m. calc. 341.1972). HRMS (ESI)  $m/z$  [M+H]<sup>+</sup>: 341.2591.

**Spectrum View**

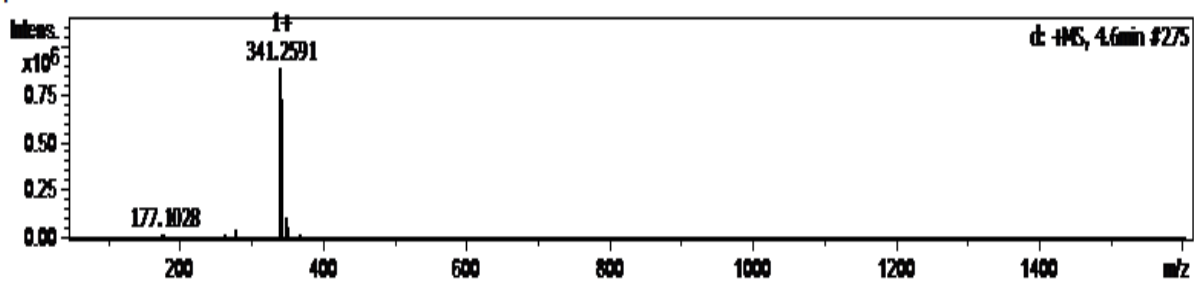

**<sup>1</sup>H NMR spectrum**

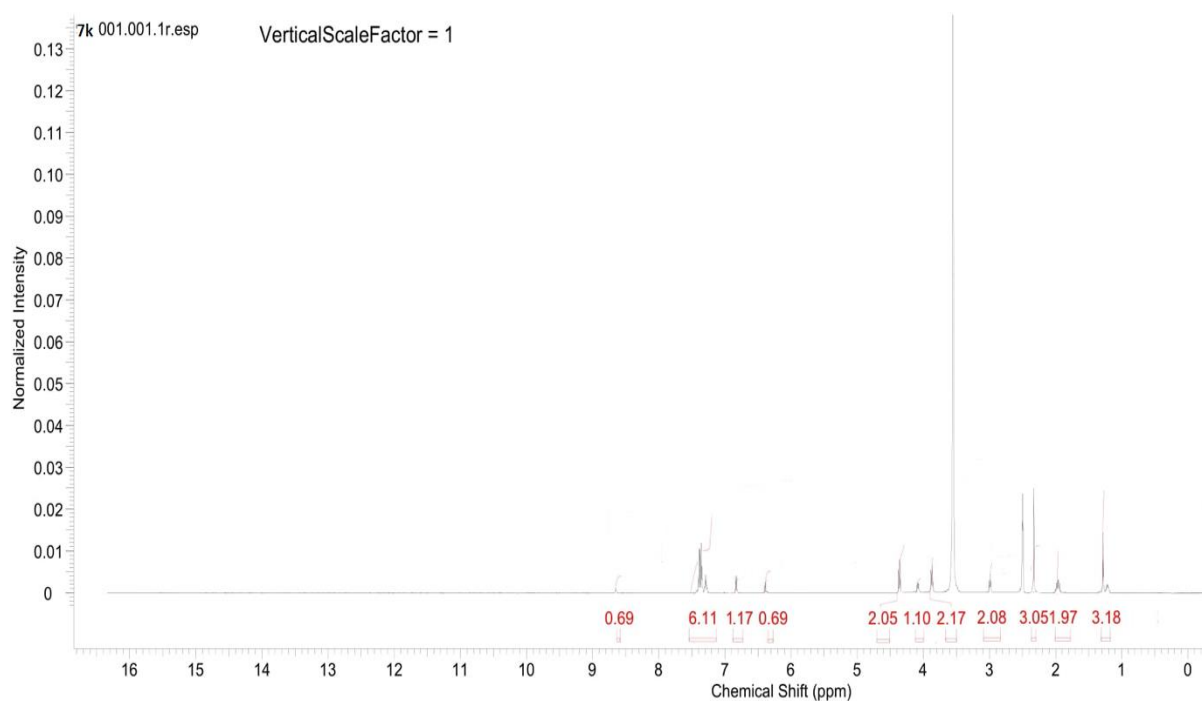

# Compound 7l

## <sup>13</sup>C NMR spectrum

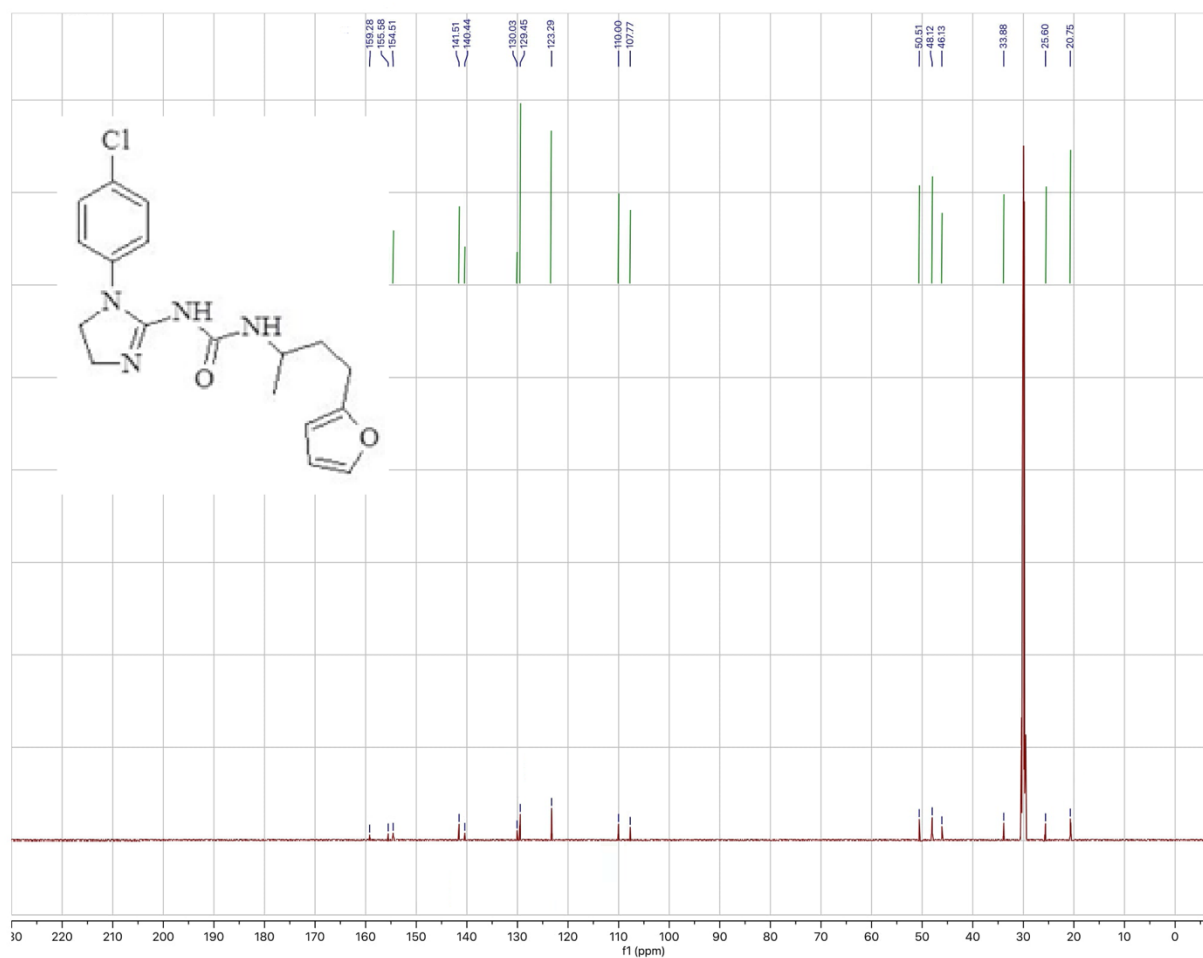

**MS spectrum:** C<sub>18</sub>H<sub>21</sub>ClN<sub>4</sub>O<sub>2</sub> (m.m. calc. 361.1426). HRMS (ESI) *m/z* [M+H]<sup>+</sup>: 361.2080.

## Spectrum View

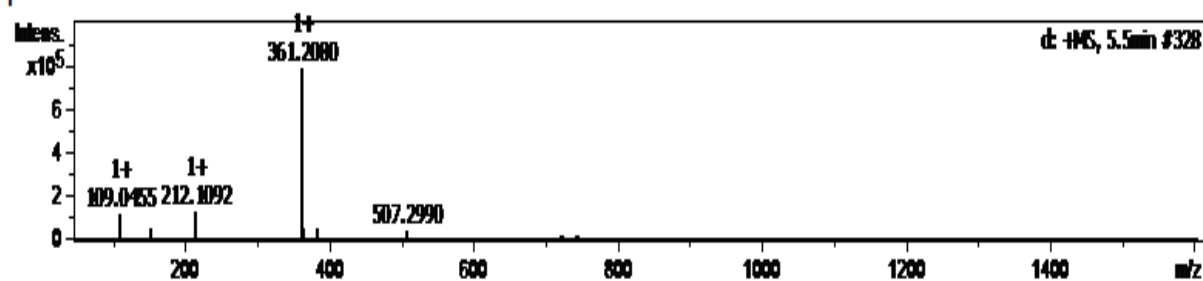

# <sup>1</sup>H NMR spectrum

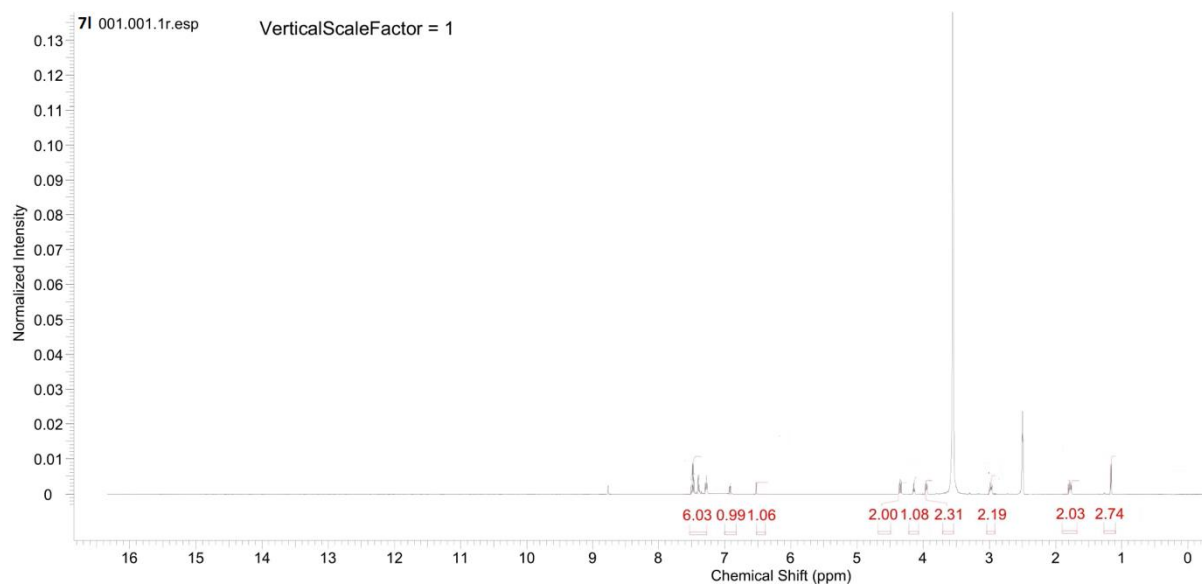

## Compound 7m

# <sup>13</sup>C NMR spectrum

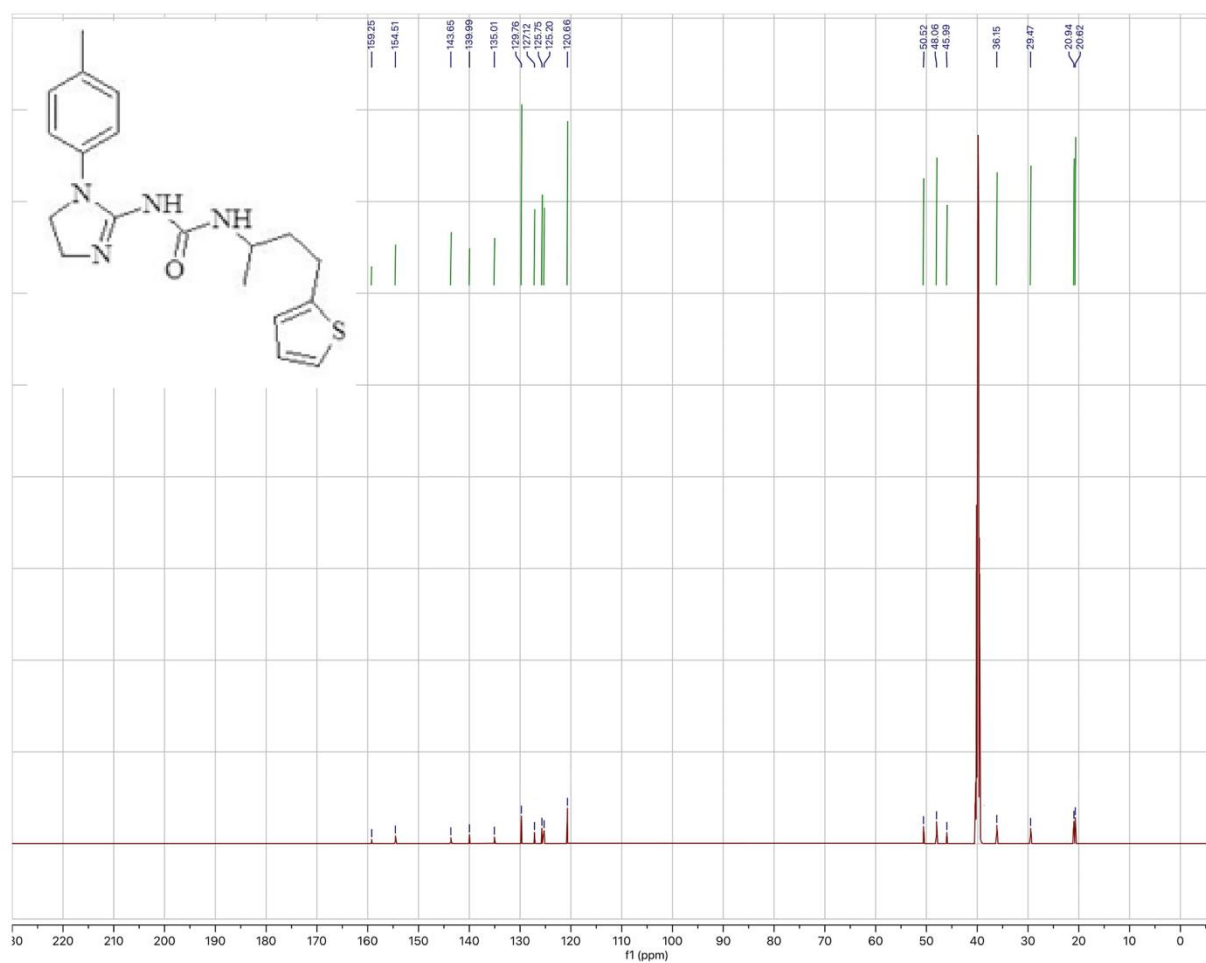

**MS spectrum:** C<sub>19</sub>H<sub>28</sub>N<sub>4</sub>OS (m.m. calc. 357.1744). HRMS (ESI)  $m/z$  [M+H]<sup>+</sup>: 357.1744.

Spectrum View

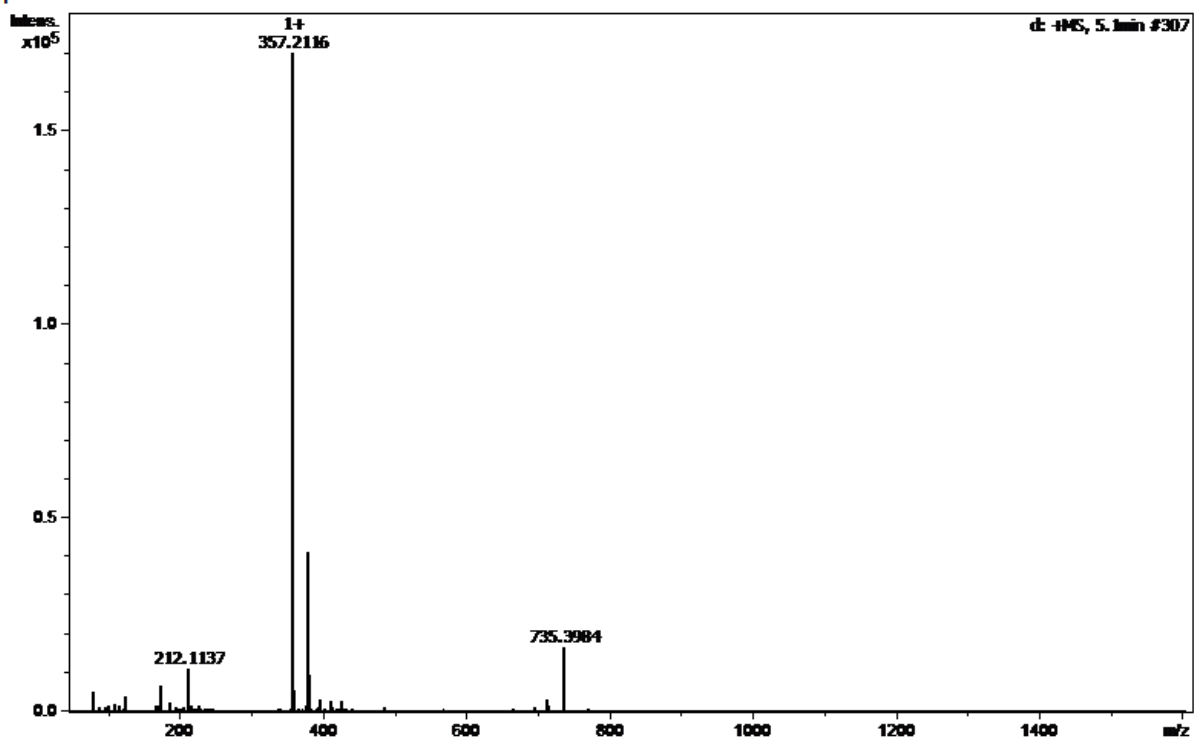

<sup>1</sup>H NMR spectrum

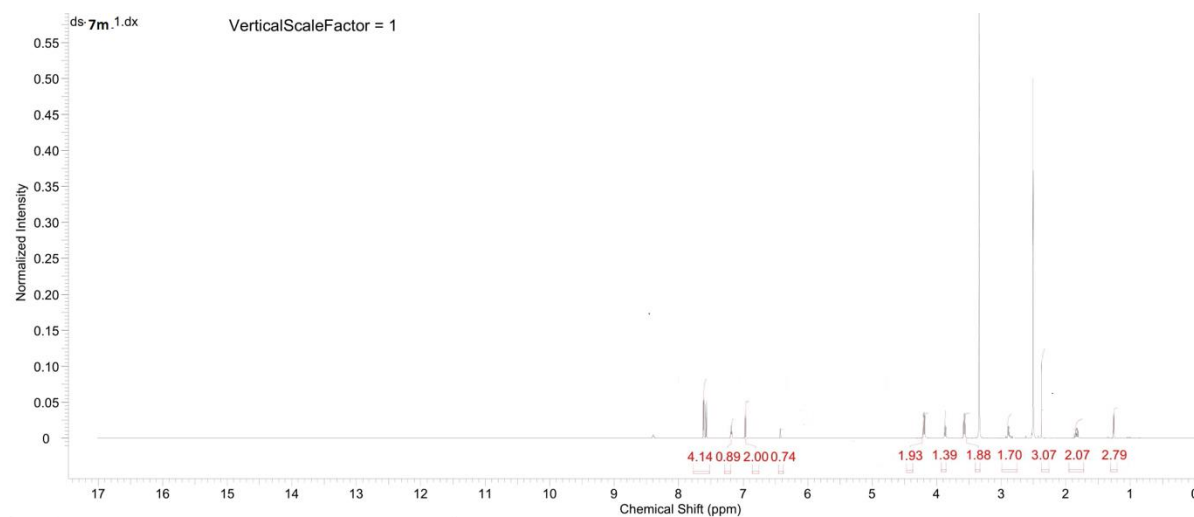

# Compound 7n

## <sup>13</sup>C NMR spectrum

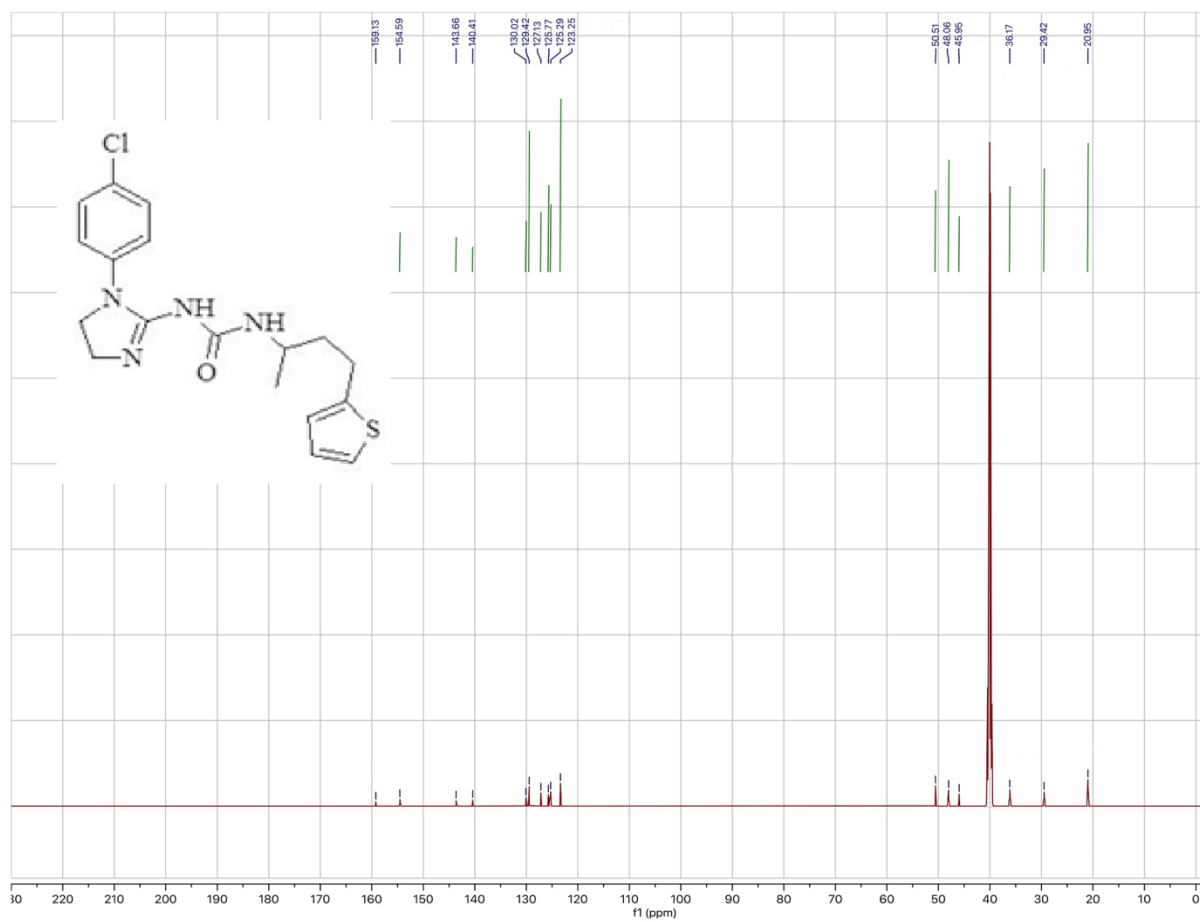

MS spectrum: C<sub>18</sub>H<sub>21</sub>ClN<sub>4</sub>OS (m.m. calc. 377.1197). HRMS (ESI) *m/z* [M+H]<sup>+</sup>: 377.1122.

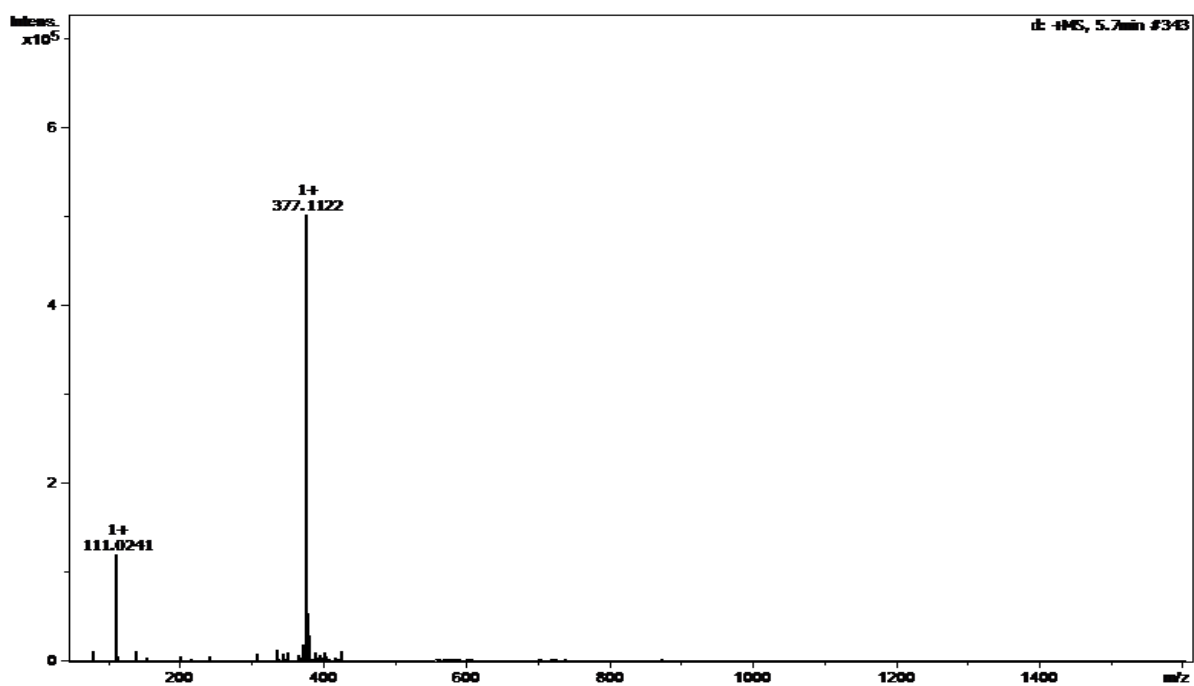

## <sup>1</sup>H NMR spectrum

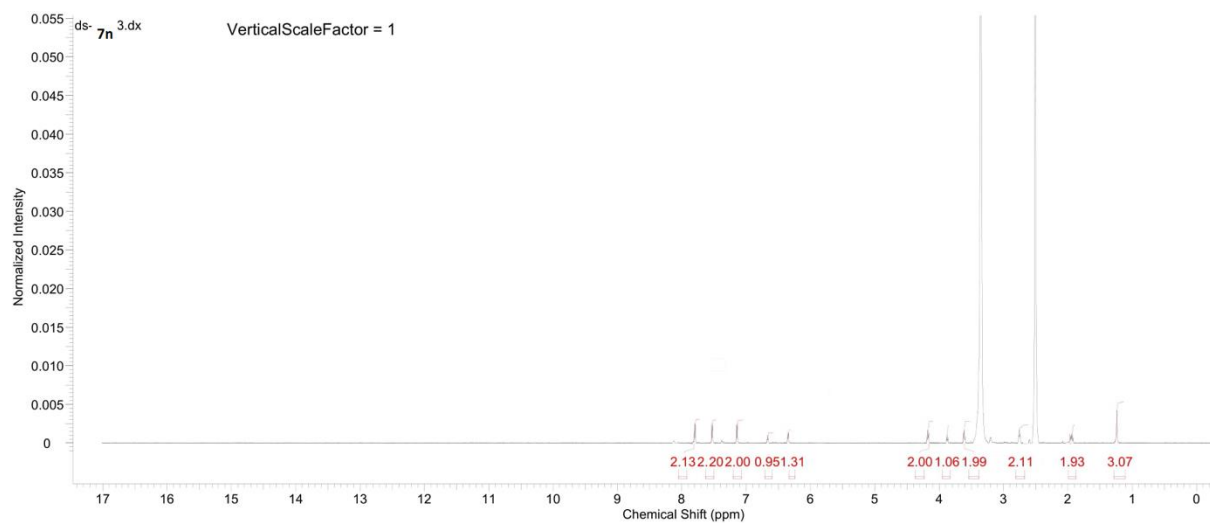

## Compound 7o

## <sup>13</sup>C NMR spectrum

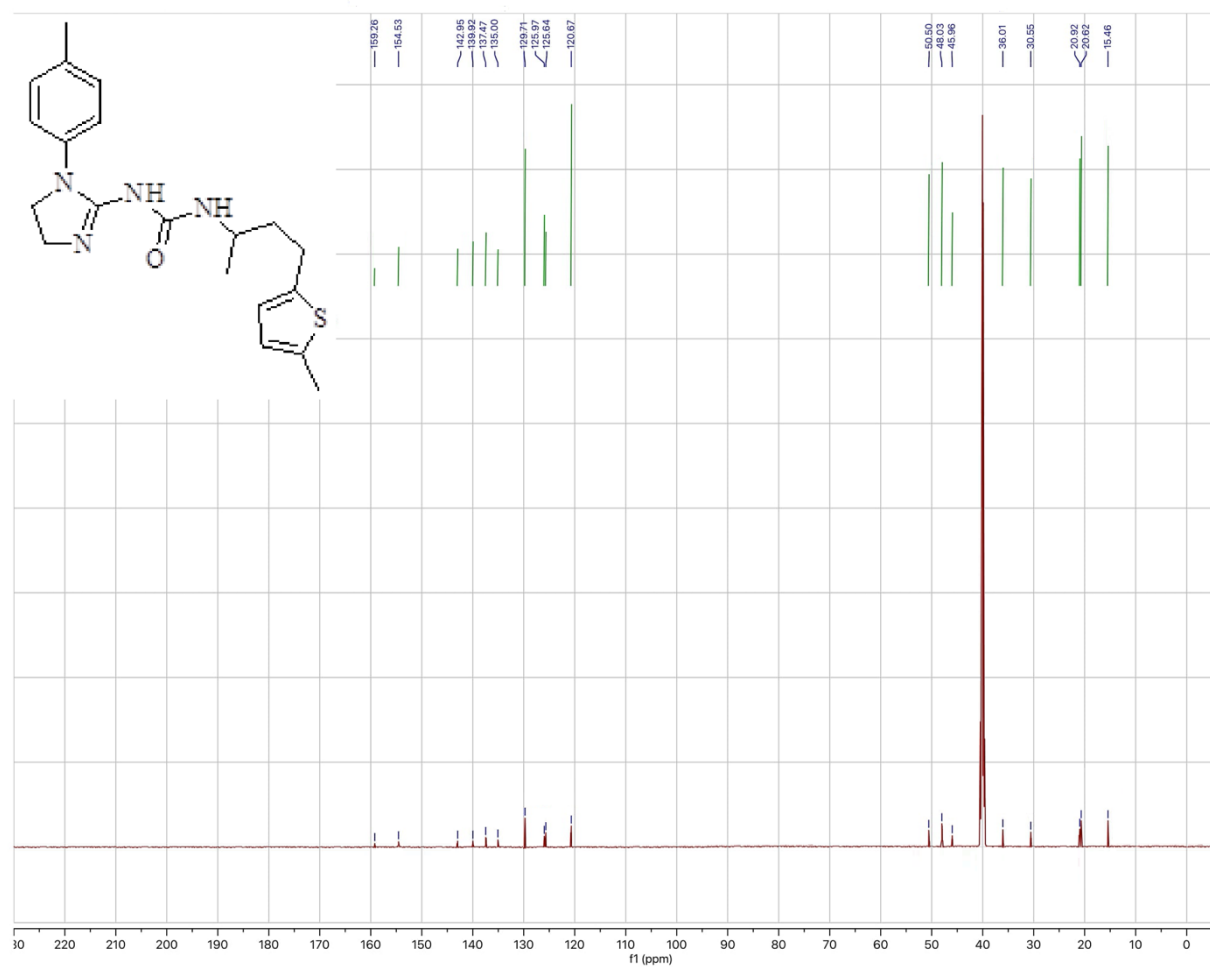

**MS spectrum:** C<sub>20</sub>H<sub>26</sub>N<sub>4</sub>OS (m.m. calc. 371.1900). HRMS (ESI)  $m/z$  [M+H]<sup>+</sup>: 371.1632.

**Spectrum View**

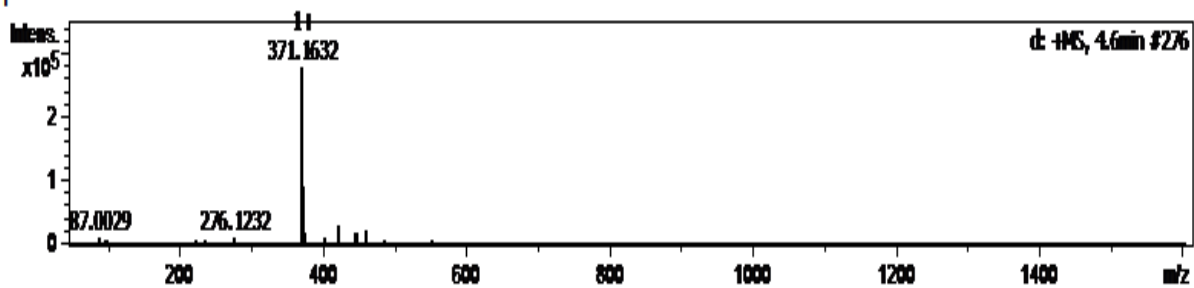

**<sup>1</sup>H NMR spectrum**

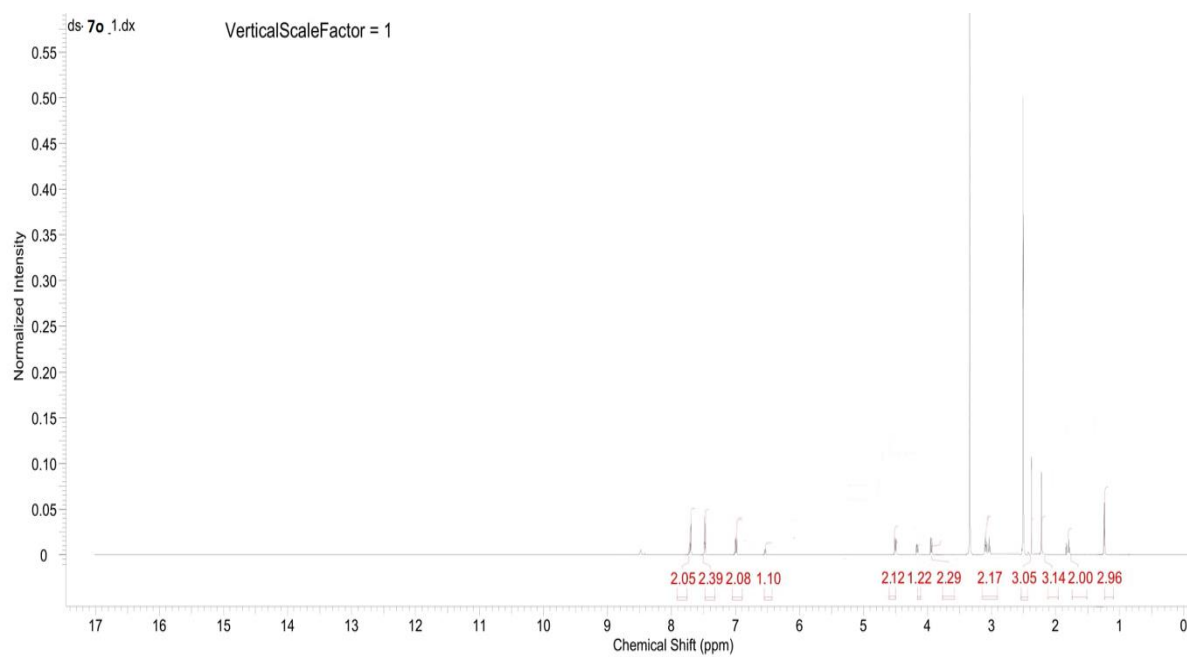

# Compound 7p

## <sup>13</sup>C NMR spectrum

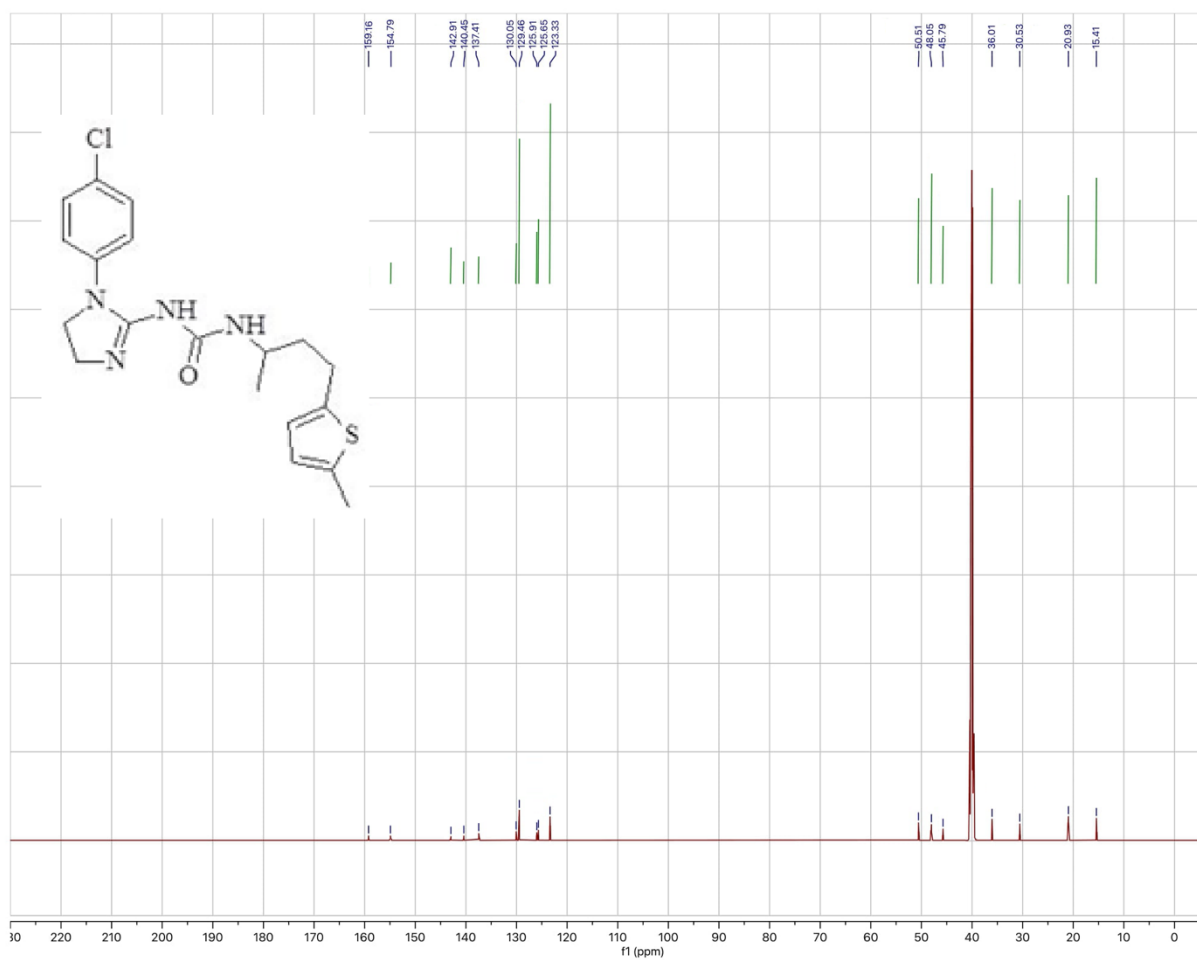

MS spectrum: C<sub>19</sub>H<sub>23</sub>ClN<sub>4</sub>OS (m.m. calc. 391.1354). HRMS (ESI) *m/z* [M+H]<sup>+</sup>: 391.1201.

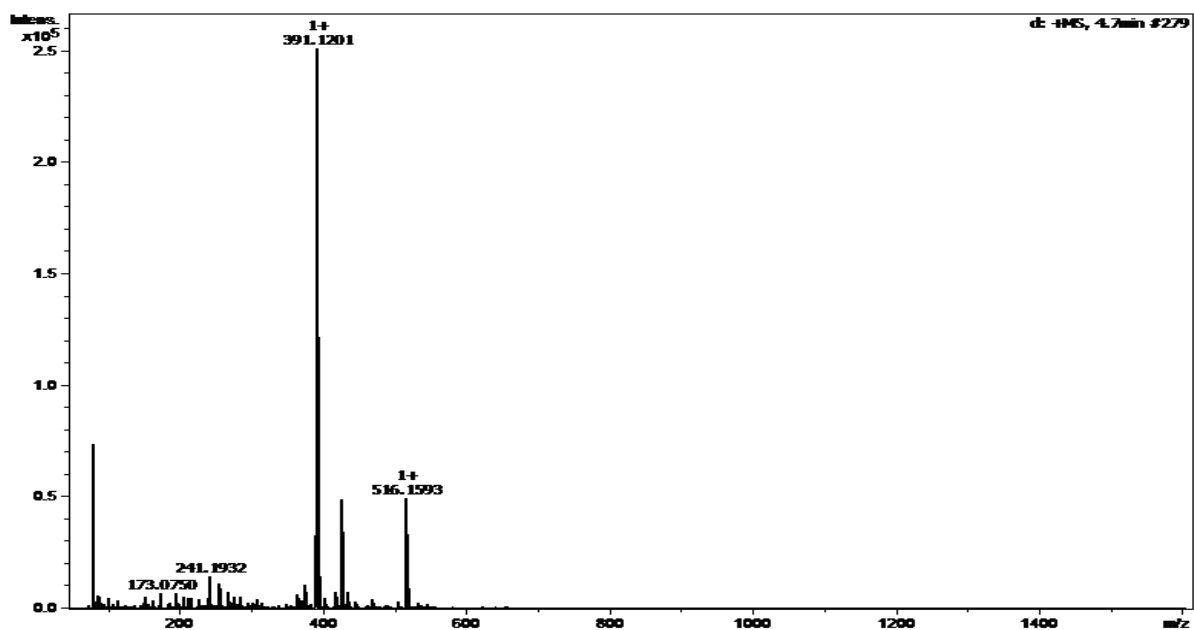

# <sup>1</sup>H NMR spectrum

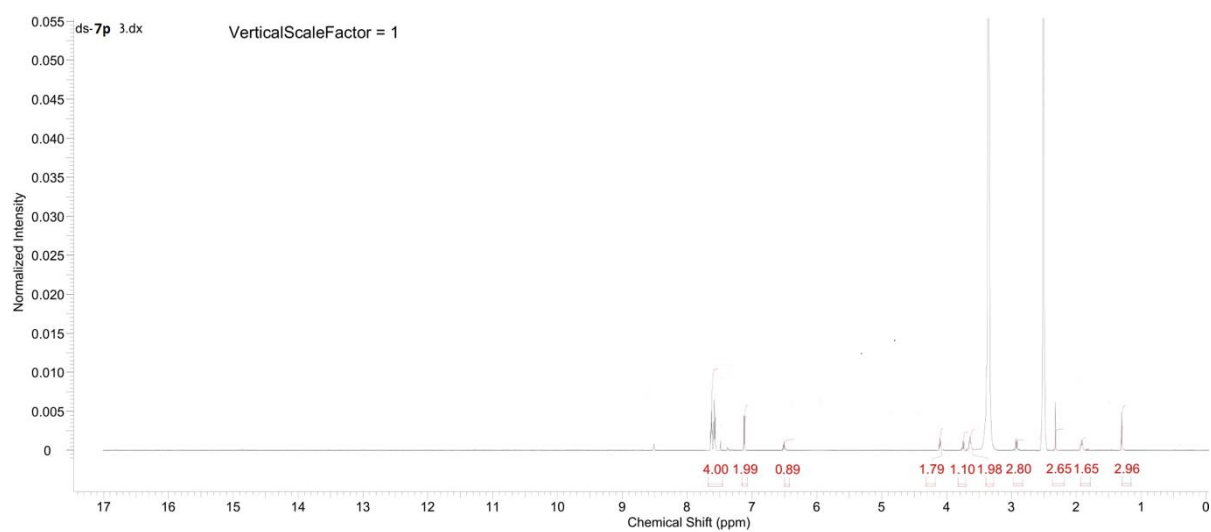

Supplement: s1 [file s1]
